# Supplementary material for: Rhodium(iii)-catalyzed Oxidative Coupling of N-Methoxybenzamides and Ethenesulfonyl fluoride: a C–H Bond Activation Strategy for the Preparation of 2-Aryl ethenesulfonyl fluorides and Sulfonyl fluoride Substituted γ-Lactams
Source: Royal Society of Chemistry journal article supplement (doi:10.1039/c7qo01128h), 2018-01-01
Supplement: c7qo01128h1.pdf [file c7qo01128h1.pdf]

Rhodium(III)-catalyzed Oxidative Coupling of *N*-Methoxybenzamides and Ethenesulfonyl fluoride: a C-H Bond Activation Strategy for the Preparation of 2-Aryl ethenesulfonyl fluorides and Sulfonyl fluoride Substituted  $\gamma$ -Lactams.

Shi-Meng Wang,<sup>a</sup> Chen Li,<sup>a</sup> Jing Leng,<sup>a</sup> Syed Nasir Abbas Bukhari<sup>a</sup> and Hua-Li Qin<sup>\*a</sup>

School of Chemistry, Chemical Engineering and Life Science, Wuhan University of Technology, 205 Luoshi Road, Wuhan, 430070, China

Email: qinhuali@whut.edu.cn

#### Table of content

|                                                                                                                                                                                 |      |
|---------------------------------------------------------------------------------------------------------------------------------------------------------------------------------|------|
| 1. General considerations.....                                                                                                                                                  | S2   |
| 2. Screening the optimized conditions for oxidative coupling of <b>1a</b> or <b>6a</b> with <b>2</b> via rhodium(III)-catalyzed monoselective <i>ortho</i> -C-H activation..... | S2   |
| 3. Procedure for the synthesis of <b>3</b> .....                                                                                                                                | S6   |
| 4. Procedure for the synthesis of <b>5</b> .....                                                                                                                                | S14  |
| 5. Procedure for the synthesis of <b>7</b> .....                                                                                                                                | S15  |
| 6. Competition reaction between methyl acrylate and ESF as coupling partners in the Rh(III)-catalyzed C-H coupling reaction. ....                                               | S20  |
| 7. Diverse derivations of <b>3</b> .....                                                                                                                                        | S22  |
| 8. NMR spectra of <b>3</b> , <b>5</b> , <b>7</b> , <b>10</b> and <b>11</b> .....                                                                                                | S23  |
| 9. Data of crystal structures.....                                                                                                                                              | S82  |
| 10. References.....                                                                                                                                                             | S114 |

## 1. General considerations

All reactions were carried out under an air atmosphere. Unless otherwise specified, NMR spectra were recorded in CDCl<sub>3</sub> on a 500 MHz (for <sup>1</sup>H), 471 MHz (for <sup>19</sup>F), and 126 MHz (for <sup>13</sup>C) spectrometer. All chemical shifts were reported in ppm relative to TMS (<sup>1</sup>H NMR, 0 ppm) as internal standards. The HPLC experiments were carried out on a Waters e2695 instrument (column: J&K, RP-C18, 5 μm, 4.6 × 150 mm), and the yields of the products were determined by using the corresponding pure compounds as the external standards. Ethenesulfonyl fluoride<sup>[1]</sup> and N-methoxybenzamides<sup>[2]</sup> were prepared according to literature. Melting points of the products were measured on a micro melting point apparatus (SGW X-4) and uncorrected. HRMS experiments were performed on a TOF-Q ESI or CI/EI instrument. Reagents used in the reactions were all purchased from commercial sources and used without further purification.

## 2. Screening the optimized conditions for oxidative coupling of **1a** or **6a** with **2**

**Table 1** The reaction of **1a** with **2** in the presence of different oxidants<sup>a</sup>

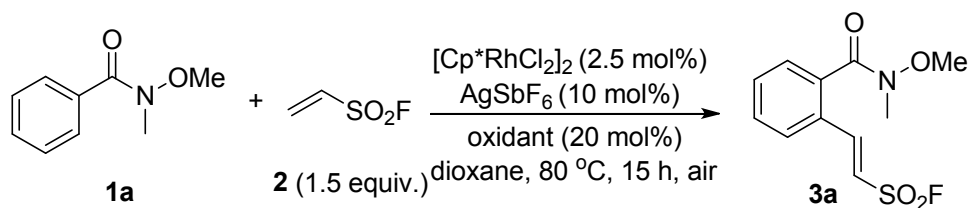

| Entry | oxidant                                      | Yield (%) <sup>b</sup> |
|-------|----------------------------------------------|------------------------|
| 1     | Cu(OAc) <sub>2</sub>                         | 48                     |
| 2     | CuO                                          | trace                  |
| 3     | CuI                                          | trace                  |
| 4     | AgOTf                                        | trace                  |
| 5     | Ag <sub>2</sub> CO <sub>3</sub>              | trace                  |
| 6     | AgTFA                                        | trace                  |
| 7     | Ag <sub>2</sub> O                            | trace                  |
| 8     | K <sub>2</sub> S <sub>2</sub> O <sub>8</sub> | trace                  |

<sup>a</sup> Reaction conditions: A mixture of **1a** (0.2 mmol, 1.0 equiv.), **2** (0.3 mmol, 1.5 equiv.), [Cp\**RhCl*<sub>2</sub>]<sub>2</sub> (2.5 mol%), AgSbF<sub>6</sub> (10 mol%), oxidant (20 mol%) and dioxane (2.0 mL) was reacted at 80 °C for 15h. <sup>b</sup> The yield was determined by HPLC using **3a** (t<sub>R</sub> = 8.879 min, λ<sub>max</sub> = 270 nm, water / methanol = 50 : 50 (v / v)) as the external standard.

**Table 2** The reaction of **1a** with **2** in the presence of different solvents.<sup>a</sup>

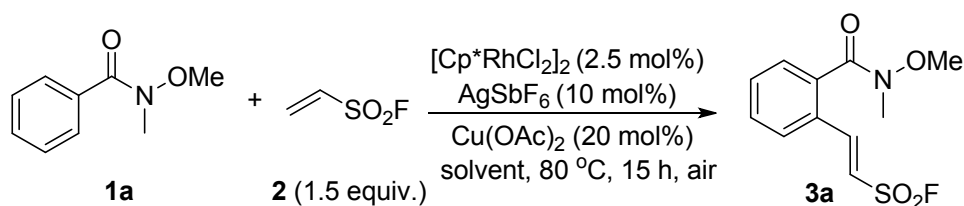

| Entry | solvent | Yield (%) <sup>b</sup> |
|-------|---------|------------------------|
| 1     | DCE     | 53                     |
| 2     | THF     | 50                     |
| 3     | HFIP    | 19                     |
| 4     | dioxane | 48                     |
| 5     | AcOH    | 14                     |
| 6     | acetone | 34                     |

<sup>a</sup> Reaction conditions: A mixture of **1a** (0.2 mmol, 1.0 equiv.), **2** (0.3 mmol, 1.5 equiv.),  $[\text{Cp}^*\text{RhCl}_2]_2$  (2.5 mol%),  $\text{AgSbF}_6$  (10 mol%),  $\text{Cu(OAc)}_2$  (20 mol%) in solvent (2.0 mL) was reacted at 80 °C for 15h. <sup>b</sup> The yield was determined by HPLC using **3a** ( $t_R = 8.879$  min,  $\lambda_{\text{max}} = 270$  nm, water / methanol = 50 : 50 (v / v)) as the external standard.

**Table 3** The reaction of **1a** with **2** in the presence of different additives. <sup>a</sup>

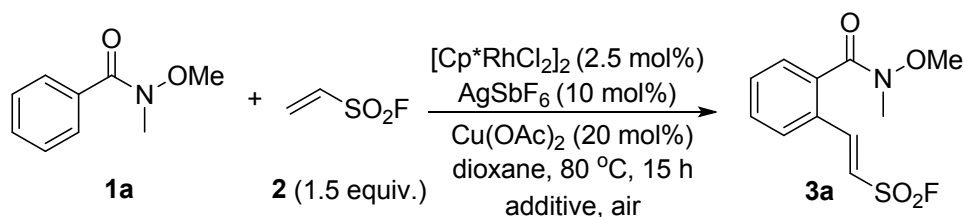

| Entry | Additive                          | Yield (%) <sup>b</sup> |
|-------|-----------------------------------|------------------------|
| 1     | 1 equiv. AcOH                     | 9                      |
| 2     | 1 equiv. NaOPiv                   | trace                  |
| 3     | 1 equiv. $\text{K}_3\text{PO}_4$  | trace                  |
| 4     | 1 equiv. $\text{Cs}_2\text{CO}_3$ | trace                  |
| 5     | 20 mol% Pyridine                  | trace                  |
| 6     | 20 mol% 2-Picoline                | trace                  |
| 7     | 20 mol% 2,6-Lutidine              | trace                  |

<sup>a</sup> Reaction conditions: A mixture of **1a** (0.2 mmol, 1.0 equiv.), **2** (0.3 mmol, 1.5 equiv.),  $[\text{Cp}^*\text{RhCl}_2]_2$  (2.5 mol%),  $\text{AgSbF}_6$  (10 mol%),  $\text{Cu(OAc)}_2$  (20 mol%) and additive in 1,4-dioxane (2.0 mL) was reacted at 80 °C for 15h. <sup>b</sup> The yield was determined by HPLC using **3a** ( $t_R = 8.879$  min,  $\lambda_{\text{max}} = 270$  nm, water / methanol = 50 : 50 (v / v)) as the external standard.

**Table 4** The reaction of **1a** with **2** under different temperatures. <sup>a</sup>

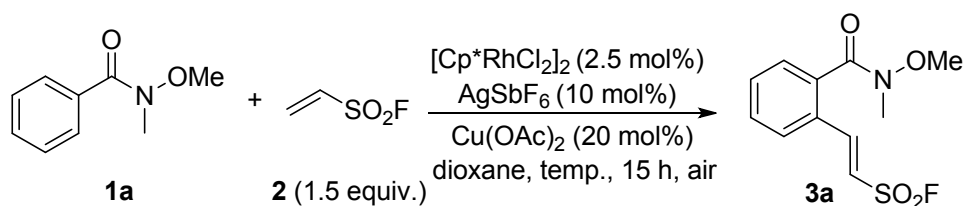

| Entry          | Temp (°C) | Yield (%) <sup>b</sup> |
|----------------|-----------|------------------------|
| 1              | 80        | 48                     |
| 2 <sup>c</sup> | 80        | 90                     |
| 3              | 100       | 92                     |
| 4              | 120       | 75                     |
| 5 <sup>d</sup> | 100       | trace                  |
| 6 <sup>e</sup> | 100       | trace                  |

<sup>a</sup> Reaction conditions: A mixture of **1a** (0.2 mmol, 1.0 equiv.), **2** (0.3 mmol, 1.5 equiv.),  $[\text{Cp}^*\text{RhCl}_2]_2$  (2.5 mol%),  $\text{AgSbF}_6$  (10 mol%),  $\text{Cu(OAc)}_2$  (20 mol%) in 1,4-dioxane (2.0 mL) was reacted at different temperature for 15h. <sup>b</sup> The yield was determined by HPLC using **3a** ( $t_R = 8.879$  min,  $\lambda_{\text{max}} = 270$  nm, water / methanol = 50 : 50 (v / v)) as the external standard. <sup>c</sup>  $\text{AgSbF}_6$  (1.0 equiv.) was used. <sup>d</sup> Without  $\text{Cu(OAc)}_2$ . <sup>e</sup> Without  $\text{AgSbF}_6$ .

**Table 5** The reaction of **6a** with **2** in the presence of different oxidants<sup>a</sup>

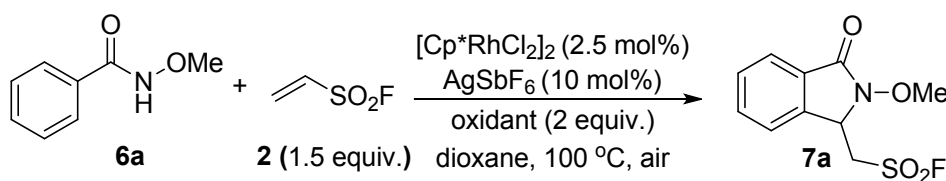

| Entry           | oxidant                          | Yield (%) <sup>b</sup> |
|-----------------|----------------------------------|------------------------|
| 1               | $\text{Cu(OAc)}_2$               | 52                     |
| 2               | $\text{CuO}$                     | trace                  |
| 3               | $\text{CuI}$                     | trace                  |
| 4               | $\text{CuF}_2$                   | 38                     |
| 5               | $\text{AgOTf}$                   | 40                     |
| 6               | $\text{Ag}_2\text{CO}_3$         | trace                  |
| 7               | $\text{AgF}$                     | trace                  |
| 8               | $\text{AgTFA}$                   | trace                  |
| 9               | $\text{Ag}_2\text{O}$            | trace                  |
| 10              | DDQ                              | trace                  |
| 11              | m-CPBA                           | trace                  |
| 12              | $\text{K}_2\text{S}_2\text{O}_8$ | trace                  |
| 13 <sup>c</sup> | $\text{Cu(OAc)}_2$               | 84                     |

<sup>a</sup> Reaction conditions: A mixture of **6a** (0.2 mmol, 1.0 equiv.), **2** (0.3 mmol, 1.5 equiv.),  $[\text{Cp}^*\text{RhCl}_2]_2$  (2.5 mol%),  $\text{AgSbF}_6$  (10 mol%), oxidant (2 equiv.) in dioxane (2.0 mL) was reacted at 100 °C for 15h. <sup>b</sup> The yield was determined by HPLC using **7a** ( $t_R = 4.592$  min,  $\lambda_{\text{max}} = 230$  nm, water / methanol = 50 : 50 (v / v)) as the external

standard. <sup>c</sup> Cu(OAc)<sub>2</sub> (20 mol%) was used.

**Table 6** The reaction of **6a** with **2** in the presence of different solvents <sup>a</sup>

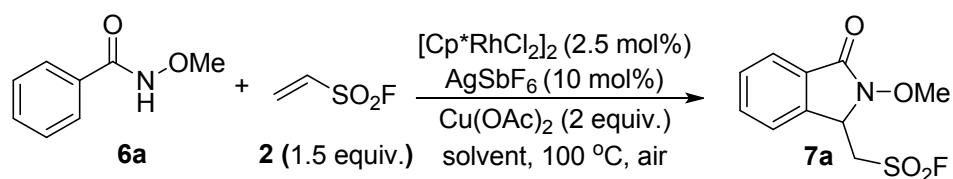

| Entry | solvent | Yield (%) <sup>b</sup> |
|-------|---------|------------------------|
| 1     | dioxane | 52                     |
| 2     | toluene | 28                     |
| 3     | DMF     | trace                  |
| 4     | DMSO    | trace                  |
| 5     | THF     | 57                     |
| 6     | DCE     | 53                     |
| 7     | MeCN    | trace                  |

<sup>a</sup> Reaction conditions: A mixture of **6a** (0.2 mmol, 1.0 equiv.), **2** (0.3 mmol, 1.5 equiv.), [Cp\*RhCl<sub>2</sub>]<sub>2</sub> (2.5 mol%), AgSbF<sub>6</sub> (10 mol%), Cu(OAc) (0.4 mmol, 2 equiv.) in solvent (2.0 mL) was reacted at 100 °C for 15h. <sup>b</sup> The yield was determined by HPLC using **7a** (*t<sub>R</sub>* = 4.592 min, λ<sub>max</sub> = 230 nm, water / methanol = 50 : 50 (v / v)) as the external standard.

**Table 7** The reaction of **6a** with **2** in the presence of different additives <sup>a</sup>

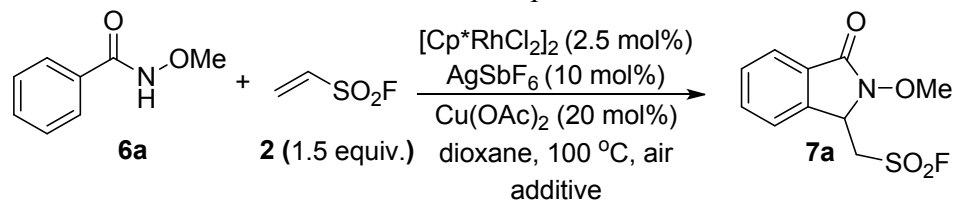

| Entry | additive                    | Yield (%) <sup>b</sup> |
|-------|-----------------------------|------------------------|
| 1     | 10 mol% PPh <sub>3</sub>    | 35                     |
| 2     | 10 mol% DPPP                | trace                  |
| 3     | 10 mol% bpy                 | trace                  |
| 4     | 10 mol% 1,10-Phen           | 38                     |
| 5     | 1 equiv. AcOH               | 47                     |
| 6     | 1 equiv. TFA                | 41                     |
| 7     | 1 equiv. NaHCO <sub>3</sub> | trace                  |
| 8     | 1 equiv. NaOAc              | trace                  |
| 9     | 1 equiv. Pyridine           | 59                     |
| 10    | 1 equiv Et <sub>3</sub> N   | trace                  |

<sup>a</sup> Reaction conditions: A mixture of **6a** (0.2 mmol, 1.0 equiv.), **2** (0.3 mmol, 1.5 equiv.), [Cp\*RhCl<sub>2</sub>]<sub>2</sub> (2.5 mol%), AgSbF<sub>6</sub> (10 mol%), Cu(OAc) (20 mol%) and additive in dioxane (2.0 mL) was reacted at 100 °C for 15h. <sup>b</sup> The yield was determined by HPLC using **7a** (*t<sub>R</sub>* = 4.592 min, λ<sub>max</sub> = 230 nm, water / methanol = 50 : 50 (v / v)) as the external standard.

**Table 8** The reaction of **6a** with **2** in the presence of different temperature <sup>a</sup>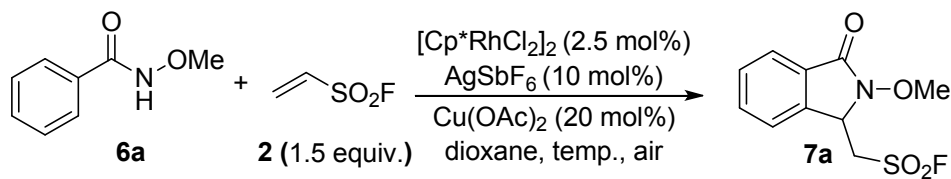

| Entry | Temp. (°C) | Yield (%) <sup>b</sup> |
|-------|------------|------------------------|
| 1     | 100        | 84                     |
| 2     | 120        | 61                     |
| 3     | 80         | 90                     |
| 4     | 60         | 50                     |

<sup>a</sup> Reaction conditions: A mixture of **6a** (0.2 mmol, 1.0 equiv.), **2** (0.3 mmol, 1.5 equiv.),  $[\text{Cp}^*\text{RhCl}_2]_2$  (2.5 mol%),  $\text{AgSbF}_6$  (10 mol%),  $\text{Cu}(\text{OAc})_2$  (20 mol%) in dioxane (2.0 mL) was reacted at different temperature for 15h. <sup>b</sup> The yield was determined by HPLC using **7a** ( $t_R = 4.592$  min,  $\lambda_{\text{max}} = 230$  nm, water / methanol = 50 : 50 (v / v)) as the external standard.

**Table 9** The reaction of **5a** with **2** in the presence of different  $\text{AgSbF}_6$  loading <sup>a</sup>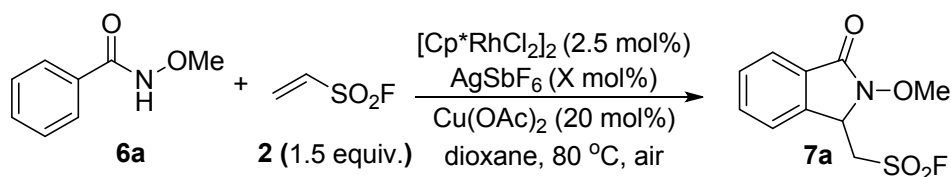

| Entry | X   | Yield (%) <sup>b</sup> |
|-------|-----|------------------------|
| 1     | 10  | 84                     |
| 2     | 25  | 80                     |
| 3     | 100 | 95                     |

<sup>a</sup> Reaction conditions: A mixture of **6a** (0.2 mmol, 1.0 equiv.), **2** (0.3 mmol, 1.5 equiv.),  $[\text{Cp}^*\text{RhCl}_2]_2$  (2.5 mol%),  $\text{AgSbF}_6$  (X mol%),  $\text{Cu}(\text{OAc})_2$  (20 mol%) in dioxane (2.0 mL) was reacted at 80 °C for 15h. <sup>b</sup> The yield was determined by HPLC using **7a** ( $t_R = 4.592$  min,  $\lambda_{\text{max}} = 230$  nm, water / methanol = 50 : 50 (v / v)) as the external standard.

### 3. Procedures for the synthesis of **3**

An oven-dried screw cap test tube was charged with *N*-methoxy-*N*-methylbenzamide (**1**, 0.5 mmol), ethenesulfonyl fluoride (ESF, **2**, 0.75 mmol, 1.5 equiv.),  $[\text{Cp}^*\text{RhCl}_2]_2$  (2.5 mol%),  $\text{AgSbF}_6$  (10 mol%),  $\text{Cu}(\text{OAc})_2$  (20 mol%) and 1,4-dioxane (5 mL) under an air atmosphere. The resulting mixture was stirred at 100 °C for 15 h before concentrating under vacuum. The residue was purified by column chromatography on silica gel using a mixture of petroleum ether and ethyl acetate as eluents to give the desired product (**3**).

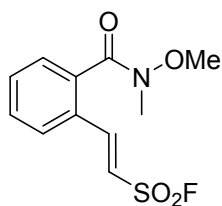

(*E*)-2-(2-(methoxy(methyl)carbamoyl)phenyl)ethenesulfonyl fluoride (**3a**). Petroleum ether / ethyl acetate = 5 : 1 (v / v) as eluent for column chromatography. Yellow oil, 123.0 mg, 90% yield. <sup>1</sup>H NMR (500 MHz, CDCl<sub>3</sub>) δ 7.88 (d, *J* = 15.5 Hz, 1H), 7.62 (d, *J* = 7.6 Hz, 1H), 7.56-7.47 (m, 3H), 6.87 (d, *J* = 15.5 Hz, 1H), 3.42 (s, 3H), 3.36 (s, 3H). <sup>19</sup>F NMR (471 MHz, CDCl<sub>3</sub>) δ 61.8 (s, 1F). <sup>13</sup>C NMR (126 MHz, CDCl<sub>3</sub>) δ 168.5 (s), 146.0 (d, *J* = 2.0 Hz), 136.6 (s), 131.8 (s), 130.1 (s), 128.6 (s), 128.0 (s), 127.4 (s), 120.2 (d, *J* = 27.7 Hz), 61.3 (s), 32.7 (s). HRMS ESI (m/z): [M+Na]<sup>+</sup> calcd for C<sub>11</sub>H<sub>12</sub>FNO<sub>4</sub>SNa: 296.0363, found: 296.0359.

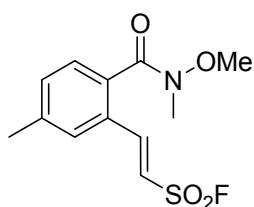

(*E*)-2-(2-(methoxy(methyl)carbamoyl)-5-methylphenyl)ethenesulfonyl fluoride (**3b**). Petroleum ether / ethyl acetate = 5 : 1 (v / v) as eluent for column chromatography. White solid, 104.9 mg, 73% yield. <sup>1</sup>H NMR (500 MHz, CDCl<sub>3</sub>) δ 7.88 (d, *J* = 15.5 Hz, 1H), 7.43 (s, 1H), 7.39 (d, *J* = 7.8 Hz, 1H), 7.35 (d, *J* = 7.8 Hz, 1H), 6.85 (d, *J* = 15.4 Hz, 1H), 3.45 (s, 3H), 3.35 (s, 3H), 2.43 (s, 3H). <sup>19</sup>F NMR (471 MHz, CDCl<sub>3</sub>) δ 61.9 (s, 1F). <sup>13</sup>C NMR (126 MHz, CDCl<sub>3</sub>) δ 168.7 (s), 146.3 (d, *J* = 1.3 Hz), 140.4 (s), 133.8 (s), 132.6 (s), 128.6 (s), 128.1 (s), 127.9 (s), 119.8 (d, *J* = 28.6 Hz), 61.3 (s), 32.8 (s), 21.3 (s). Mp 98-100 °C. HRMS ESI (m/z): [M+Na]<sup>+</sup> calcd for C<sub>12</sub>H<sub>14</sub>FNO<sub>4</sub>SNa: 310.0520, found: 310.0520.

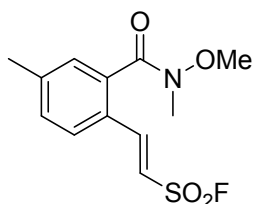

(*E*)-2-(2-(methoxy(methyl)carbamoyl)-4-methylphenyl)ethenesulfonyl fluoride (**3c**). Petroleum ether / ethyl acetate = 5 : 1 (v / v) as eluent for column chromatography. White solid, 99.1 mg, 69% yield. <sup>1</sup>H NMR (500 MHz, CDCl<sub>3</sub>) δ 7.83 (d, *J* = 15.5 Hz, 1H), 7.52 (d, *J* = 8.0 Hz, 1H), 7.31 (d, *J* = 8.1 Hz, 1H), 7.28 (s, 1H), 6.82 (d, *J* = 15.6 Hz, 1H), 3.34 (br, 6H), 2.43 (s, 3H). <sup>19</sup>F NMR (471 MHz, CDCl<sub>3</sub>) δ 62.1 (s, 1F). <sup>13</sup>C NMR (126 MHz, CDCl<sub>3</sub>) δ 168.9 (s), 146.0 (d, *J* = 2.0 Hz), 143.0 (s), 136.8 (s), 130.9 (s), 128.5 (s), 127.4 (s), 125.7 (s), 118.9 (d, *J* = 30.2 Hz), 61.3 (s), 32.6 (s), 21.5 (s).

Mp 80-82 °C. HRMS ESI (m/z): [M+Na]<sup>+</sup> calcd for C<sub>12</sub>H<sub>14</sub>FNO<sub>4</sub>SNa: 310.0520, found: 310.0515.

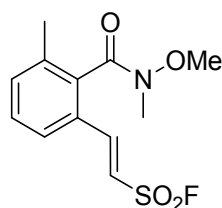

(*E*)-2-(2-(methoxy(methyl)carbamoyl)-3-methylphenyl)ethenesulfonyl fluoride (**3d**). Petroleum ether / ethyl acetate = 5 : 1 (v / v) as eluent for column chromatography. White solid, 90.5 mg, 63% yield. The product were obtained as two rotational isomers. Major : minor = 1 : 0.25. Major: <sup>1</sup>H NMR (500 MHz, CDCl<sub>3</sub>) δ 7.76 (d, *J* = 15.4 Hz, 1H), 7.45-7.44 (m, 1H), 7.37-7.36 (m, 2H), 6.86 (dd, *J* = 15.4, 2.2 Hz, 1H), 3.41 (s, 3H), 3.36 (s, 3H), 2.34 (s, 3H). <sup>19</sup>F NMR (471 MHz, CDCl<sub>3</sub>) δ 61.9 (s, 1F). <sup>13</sup>C NMR (126 MHz, CDCl<sub>3</sub>) δ 169.3 (s), 146.3 (d, *J* = 2.8 Hz), 137.1 (s), 136.1 (s), 133.7 (s), 129.3 (s), 127.8 (s), 124.6 (s), 120.0 (d, *J* = 28.2 Hz), 61.4 (s), 32.5 (s), 19.2 (s). Minor: <sup>1</sup>H NMR (500 MHz, CDCl<sub>3</sub>) δ 7.82 (d, *J* = 15.5 Hz, 0.25H), 7.45-7.44 (m, 0.36H), 7.40-7.39 (m, 0.56H), 6.92 (dd, *J* = 15.5, 1.9 Hz, 0.26H), 3.94 (s, 0.75H), 3.01 (s, 0.73H), 2.37 (s, 0.81H). <sup>19</sup>F NMR (471 MHz, CDCl<sub>3</sub>) δ 61.8 (s, 0.23F). <sup>13</sup>C NMR (126 MHz, CDCl<sub>3</sub>) δ 164.9 (s), 145.1 (d, *J* = 2.7 Hz), 136.2 (s), 136.1 (s), 134.3 (s), 130.0 (s), 127.9 (s), 125.4 (s), 121.0 (d, *J* = 28.5 Hz), 61.0 (s), 35.7 (s), 18.9 (s). Mp 77-79 °C. HRMS ESI (m/z): [M+Na]<sup>+</sup> calcd for C<sub>12</sub>H<sub>14</sub>FNO<sub>4</sub>SNa: 310.0520, found: 310.0515.

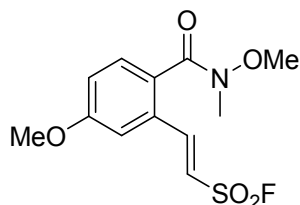

(*E*)-2-(5-methoxy-2-(methoxy(methyl)carbamoyl)phenyl)ethenesulfonyl fluoride (**3e**). Petroleum ether / ethyl acetate = 3 : 1 (v / v) as eluent for column chromatography. Yellow solid, 110.7 mg, 73% yield. <sup>1</sup>H NMR (500 MHz, CDCl<sub>3</sub>) δ 7.92 (d, *J* = 15.4 Hz, 1H), 7.46 (d, *J* = 8.4 Hz, 1H), 7.07 (s, 1H), 7.06 (d, *J* = 11.6 Hz, 1H), 6.83 (d, *J* = 15.3 Hz, 1H), 3.88 (s, 3H), 3.46 (s, 3H), 3.34 (s, 3H). <sup>19</sup>F NMR (471 MHz, CDCl<sub>3</sub>) δ 61.9 (s). <sup>13</sup>C NMR (126 MHz, CDCl<sub>3</sub>) δ 168.2 (s), 160.7 (s), 146.3 (s), 130.5 (s), 123.0 (s), 128.7 (s), 120.2 (d, *J* = 28.2 Hz), 117.2 (s), 112.4 (s), 61.2 (s), 55.6 (s), 33.3 (s). Mp 89-92 °C. HRMS ESI (m/z): [M+Na]<sup>+</sup> calcd for C<sub>12</sub>H<sub>14</sub>FNO<sub>5</sub>SNa: 326.0469, found: 326.0465.



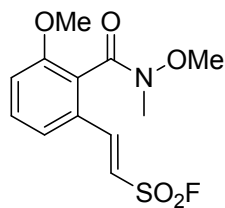

(*E*)-2-(3-methoxy-2-(methoxy(methyl)carbamoyl)phenyl)ethenesulfonyl fluoride (**3f**). Petroleum ether / ethyl acetate = 3 : 1 (v /v) as eluent for column chromatography. White solid, 109.2 mg, 72% yield. The product were obtained as two rotational isomers. Major : minor = 1 : 0.28. Major: <sup>1</sup>H NMR (500 MHz, CDCl<sub>3</sub>) δ 7.71 (d, *J* = 15.5 Hz, 1H), 7.42 (t, *J* = 8.1 Hz, 1H), 7.19 (d, *J* = 7.8 Hz, 1H), 7.07 (d, *J* = 8.3 Hz, 1H), 6.88 (dd, *J* = 15.5, 1.9 Hz, 1H), 3.86 (s, 3H), 3.41 (s, 3H), 3.39 (s, 3H). <sup>19</sup>F NMR (471 MHz, CDCl<sub>3</sub>) δ 61.8 (s, 1F). <sup>13</sup>C NMR (126 MHz, CDCl<sub>3</sub>) δ 167.1 (s), 156.4 (s), 145.6 (d, *J* = 2.4 Hz), 130.5 (s), 129.1 (s), 127.0 (s), 120.7 (d, *J* = 28.3 Hz), 119.4 (s), 114.4 (s), 61.4 (s), 56.2 (s), 32.4 (s). Minor: <sup>1</sup>H NMR (500 MHz, CDCl<sub>3</sub>) δ 7.79 (d, *J* = 15.5 Hz, 0.28H), 7.42 (t, *J* = 8.1 Hz, 0.36H), 7.19 (d, *J* = 7.8 Hz, 0.39H), 7.07 (d, *J* = 8.3 Hz, 0.34H), 6.94 (d, *J* = 15.6 Hz, 0.32H), 3.89 (s, 0.93H), 3.86 (s, 1.06H), 3.05 (s, 0.81H). <sup>19</sup>F NMR (471 MHz, CDCl<sub>3</sub>) δ 61.7 (s, 0.28F). <sup>13</sup>C NMR (126 MHz, CDCl<sub>3</sub>) δ 163.1 (s), 144.8 (s), 131.3 (s), 129.5 (s), 126.0 (s), 121.4 (d, *J* = 28.2 Hz), 119.9 (s), 114.5 (s), 60.9 (s), 35.8 (s). Theoretically, there should be twelve peaks, due to the compact overlaying, it is difficult to specify the overlaying peaks. Mp 129-131 °C. HRMS ESI (m/z): [M+Na]<sup>+</sup> calcd for C<sub>12</sub>H<sub>14</sub>FNO<sub>5</sub>SNa: 326.0469, found: 326.0464.

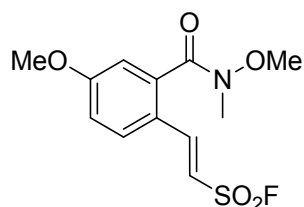

(*E*)-2-(4-methoxy-2-(methoxy(methyl)carbamoyl)phenyl)ethenesulfonyl fluoride (**3g**). Petroleum ether / ethyl acetate = 3 : 1 (v /v) as eluent for column chromatography. Yellow solid, 51.6 mg, 34% yield. <sup>1</sup>H NMR (500 MHz, CDCl<sub>3</sub>) δ 7.78 (d, *J* = 15.4 Hz, 1H), 7.59 (d, *J* = 8.7 Hz, 1H), 7.01 (d, *J* = 8.8 Hz, 1H), 6.96 (s, 1H), 6.72 (d, *J* = 15.3 Hz, 1H), 3.88 (s, 3H), 3.41 (br, 6H). <sup>19</sup>F NMR (471 MHz, CDCl<sub>3</sub>) δ 62.6 (s, 1F). <sup>13</sup>C NMR (126 MHz, CDCl<sub>3</sub>) δ 168.4 (s), 162.4 (s), 145.6 (d, *J* = 4.6 Hz), 138.9 (s), 129.4 (s), 120.7 (s), 116.9 (d, *J* = 28.1 Hz), 116.0 (s), 113.0 (s), 61.4 (s), 55.8 (s), 32.5 (s). Mp 102-104 °C. HRMS ESI (m/z): [M+Na]<sup>+</sup> calcd for C<sub>12</sub>H<sub>14</sub>FNO<sub>5</sub>SNa: 326.0469, found: 326.0467.

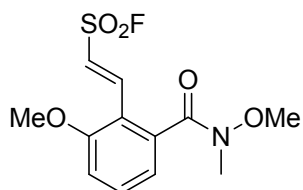

(*E*)-2-(2-methoxy-6-(methoxy(methyl)carbamoyl)phenyl)ethenesulfonyl fluoride (**3h**). Petroleum ether / ethyl acetate = 3 : 1 (v /v) as eluent for column chromatography. Yellow oil, 54.6 mg, 36% yield. <sup>1</sup>H NMR (500 MHz, CDCl<sub>3</sub>) δ 7.77 (d, *J* = 15.3 Hz, 1H), 7.49 (t, *J* = 7.9 Hz, 1H), 7.26 (d, *J* = 15.3 Hz, 1H), 7.03 (t, *J* = 7.6 Hz, 2H), 3.97 (s, 3H), 3.39 (s, 6H). <sup>19</sup>F NMR (471 MHz, CDCl<sub>3</sub>) δ 61.6 (s, 1F). <sup>13</sup>C NMR (126 MHz, CDCl<sub>3</sub>) δ 169.2 (s), 159.3 (s), 141.9 (d, *J* = 2.0 Hz), 139.2 (s), 132.9 (s), 121.7 (d, *J* = 24.6 Hz), 119.4 (s), 112.0 (s), 100.0 (s), 61.4 (s), 56.0 (s), 32.5 (s). HRMS ESI (m/z): [M+Na]<sup>+</sup> calcd for C<sub>12</sub>H<sub>14</sub>FNO<sub>5</sub>SNa: 326.0469, found: 326.0466.

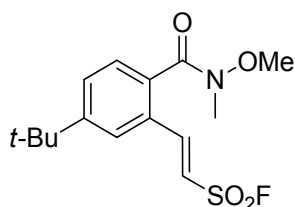

(*E*)-2-(5-(tert-butyl)-2-(methoxy(methyl)carbamoyl)phenyl)ethenesulfonyl fluoride (**3i**). Petroleum ether / ethyl acetate = 5 : 1 (v /v) as eluent for column chromatography. White solid, 107.1 mg, 65% yield. <sup>1</sup>H NMR (500 MHz, CDCl<sub>3</sub>) δ 7.91 (d, *J* = 15.5 Hz, 1H), 7.58 (s, 1H), 7.57 (d, *J* = 8.4 Hz, 1H), 7.42 (d, *J* = 8.0 Hz, 1H), 6.87 (d, *J* = 15.2 Hz, 1H), 3.47 (s, 3H), 3.35 (s, 3H), 1.35 (s, 9H). <sup>19</sup>F NMR (471 MHz, CDCl<sub>3</sub>) δ 62.0 (s, 1F). <sup>13</sup>C NMR (126 MHz, CDCl<sub>3</sub>) δ 168.5 (s), 153.6 (s), 146.7 (s), 133.8 (s), 129.1 (s), 128.3 (s), 127.9 (s), 124.4 (s), 119.8 (d, *J* = 28.6 Hz), 61.3 (s), 35.0 (s), 31.2 (s), 31.1 (s). Mp 82-83 °C. HRMS ESI (m/z): [M+Na]<sup>+</sup> calcd for C<sub>15</sub>H<sub>20</sub>FNO<sub>4</sub>SNa: 352.0989, found: 352.0985.

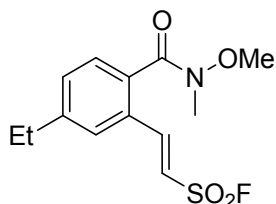

(*E*)-2-(5-ethyl-2-(methoxy(methyl)carbamoyl)phenyl)ethenesulfonyl fluoride (**3j**). Petroleum ether / ethyl acetate = 5 : 1 (v /v) as eluent for column chromatography. White solid, 78.3 mg, 52% yield. <sup>1</sup>H NMR (500 MHz, CDCl<sub>3</sub>) δ 7.89 (d, *J* = 15.5 Hz, 1H), 7.43 (s, 1H), 7.41 (d, *J* = 7.8 Hz, 1H), 7.37 (d, *J* = 7.8 Hz, 1H), 6.86 (d, *J* = 15.4 Hz, 1H), 3.46 (s, 3H), 3.34 (s, 3H), 2.71 (q, *J* = 7.6 Hz, 2H), 1.27 (t, *J* = 7.6 Hz, 3H). <sup>19</sup>F NMR (471 MHz, CDCl<sub>3</sub>) δ 61.9 (s, 1F). <sup>13</sup>C NMR (126 MHz, CDCl<sub>3</sub>) δ 168.6 (s), 146.6 (s), 146.3 (s), 134.0 (s), 131.5 (s), 128.6 (s), 128.2 (s), 126.8 (s), 119.8 (d, *J* =

27.4 Hz), 61.3 (s), 33.1 (s), 28.6 (s), 15.1 (s). Mp 85-87 °C. HRMS ESI (m/z): [M+Na]<sup>+</sup> calcd for C<sub>13</sub>H<sub>16</sub>FNO<sub>4</sub>SNa: 324.0676, found: 324.0674.

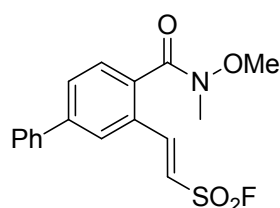

(*E*)-2-(4-(methoxy(methyl)carbamoyl)-[1,1'-biphenyl]-3-yl)ethenesulfonyl fluoride (**3k**). Petroleum ether / ethyl acetate = 5 : 1 (v /v) as eluent for column chromatography. White solid, 118.8 mg, 68% yield. <sup>1</sup>H NMR (500 MHz, CDCl<sub>3</sub>) δ 7.97 (d, *J* = 15.5 Hz, 1H), 7.80 (d, *J* = 1.1 Hz, 1H), 7.75 (dd, *J* = 8.0, 1.6 Hz, 1H), 7.61-7.57 (m, 3H), 7.49 (t, *J* = 7.4 Hz, 2H), 7.43 (t, *J* = 7.3 Hz, 1H), 6.94 (d, *J* = 15.5 Hz, 1H), 3.50 (s, 3H), 3.39 (s, 3H). <sup>19</sup>F NMR (471 MHz, CDCl<sub>3</sub>) δ 61.9 (s, 1F). <sup>13</sup>C NMR (126 MHz, CDCl<sub>3</sub>) δ 168.4 (s), 146.1 (s), 143.3 (s), 139.0 (s), 135.1 (s), 130.3 (s), 129.2 (s), 129.2 (s), 128.7 (s), 128.5 (s), 127.2 (s), 126.1 (s), 120.5 (d, *J* = 28.1 Hz), 61.4 (s), 33.0 (s). Mp 116-117 °C. HRMS ESI (m/z): [M+Na]<sup>+</sup> calcd for C<sub>17</sub>H<sub>16</sub>FNO<sub>4</sub>SNa: 372.0676, found: 372.0671.

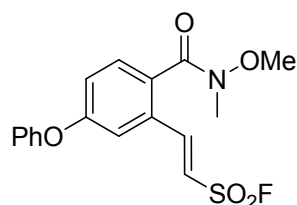

(*E*)-2-(2-(methoxy(methyl)carbamoyl)-5-phenoxyphenyl)ethenesulfonyl fluoride (**3l**). Petroleum ether / ethyl acetate = 3 : 1 (v /v) as eluent for column chromatography. White solid, 124.2 mg, 68% yield. <sup>1</sup>H NMR (500 MHz, CDCl<sub>3</sub>) δ 7.88 (d, *J* = 15.5 Hz, 1H), 7.47 (d, *J* = 8.5 Hz, 1H), 7.41 (t, *J* = 7.9 Hz, 2H), 7.22 (t, *J* = 7.4 Hz, 1H), 7.18 (d, *J* = 1.9 Hz, 1H), 7.12 (dd, *J* = 8.5, 2.1 Hz, 1H), 7.05 (d, *J* = 7.7 Hz, 2H), 6.76 (dd, *J* = 15.4, 1.7 Hz, 1H), 3.48 (s, 3H), 3.35 (s, 3H). <sup>19</sup>F NMR (471 MHz, CDCl<sub>3</sub>) δ 61.9 (s, 1F). <sup>13</sup>C NMR (126 MHz, CDCl<sub>3</sub>) δ 168.0 (s), 159.1 (s), 155.4 (s), 145.6 (s), 130.7 (s), 130.7 (d, *J* = 3.1 Hz), 130.3 (s), 130.1 (s), 124.9 (s), 120.9 (s), 120.7 (d, *J* = 28.5 Hz), 119.9 (s), 116.1 (s), 61.3 (s), 32.9 (s). Mp 118-120 °C. HRMS ESI (m/z): [M+Na]<sup>+</sup> calcd for C<sub>17</sub>H<sub>16</sub>FNO<sub>5</sub>SNa: 388.0625, found: 388.0621.

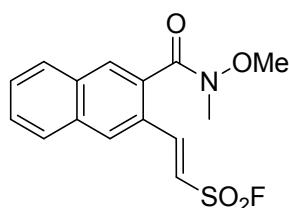

(*E*)-2-(3-(methoxy(methyl)carbamoyl)naphthalen-2-yl)ethenesulfonyl fluoride (**3m**). Petroleum ether / ethyl acetate = 3 : 1 (v /v) as eluent for column chromatography. White solid, 111.5 mg, 69% yield. <sup>1</sup>H NMR (500 MHz, CDCl<sub>3</sub>) δ 8.11 (s, 1H), 8.02 (d, *J* = 15.5 Hz, 1H), 7.98 (s, 1H), 7.90 (d, *J* = 9.6 Hz, 2H), 7.65-7.60 (m, 2H), 6.95 (dd, *J* = 15.4, 1.3 Hz, 1H), 3.45 (s, 3H), 3.40 (s, 3H). <sup>19</sup>F NMR (471 MHz, CDCl<sub>3</sub>) δ 62.0 (s, 1F). <sup>13</sup>C NMR (126 MHz, CDCl<sub>3</sub>) δ 168.7 (s), 146.7 (s), 133.8 (s), 132.9 (s), 132.4 (s), 129.2 (s), 129.0 (s), 128.7 (s), 128.3 (s), 128.3 (s), 128.1 (s), 126.2 (s), 119.9 (d, *J* = 28.1 Hz), 61.3 (s), 33.2 (s). Mp 121-122 °C. HRMS ESI (m/z): [M+Na]<sup>+</sup> calcd for C<sub>15</sub>H<sub>14</sub>FNO<sub>4</sub>SNa: 346.0520, found: 346.0517.

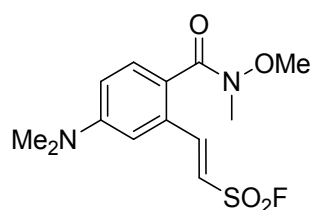

(*E*)-2-(5-(dimethylamino)-2-(methoxy(methyl)carbamoyl)phenyl)ethenesulfonyl fluoride (**3n**). Petroleum ether / ethyl acetate = 2 : 1 (v /v) as eluent for column chromatography. Orange solid, 117.0 mg, 74% yield. <sup>1</sup>H NMR (500 MHz, CDCl<sub>3</sub>) δ 7.99 (d, *J* = 15.4 Hz, 1H), 7.39 (d, *J* = 8.7 Hz, 1H), 6.83-6.74 (m, 3H), 3.47 (s, 3H), 3.29 (s, 3H), 3.02 (s, 3H). <sup>19</sup>F NMR (471 MHz, CDCl<sub>3</sub>) δ 62.0 (s). <sup>13</sup>C NMR (126 MHz, CDCl<sub>3</sub>) δ 168.9 (s), 151.1 (s), 148.1 (d, *J* = 2.0 Hz), 130.4 (s), 129.9 (s), 122.9 (s), 119.0 (d, *J* = 27.7 Hz), 114.5 (s), 109.4 (s), 61.1 (s), 40.1 (s), 33.7 (s). Mp 90-91 °C. HRMS ESI (m/z): [M+Na]<sup>+</sup> calcd for C<sub>13</sub>H<sub>17</sub>FN<sub>2</sub>O<sub>4</sub>SNa: 339.0785, found: 339.0781.

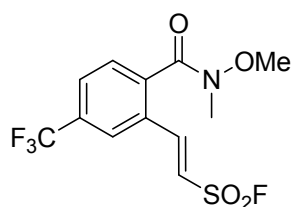

(*E*)-2-(2-(methoxy(methyl)carbamoyl)-5-(trifluoromethyl)phenyl)ethenesulfonyl fluoride (**3o**). Petroleum ether / ethyl acetate = 5 : 1 (v /v) as eluent for column chromatography. White solid, 99.0 mg, 58% yield. <sup>1</sup>H NMR (500 MHz, CDCl<sub>3</sub>) δ 7.88 (d, *J* = 14.2 Hz, 1H), 7.86 (s, 1H), 7.79 (d, *J* = 8.0 Hz, 1H), 7.63 (d, *J* = 8.0 Hz, 1H), 6.97 (d, *J* = 15.4 Hz, 1H), 3.40 (s, 6H). <sup>19</sup>F NMR (471 MHz, CDCl<sub>3</sub>) δ 61.6 (s, 1F), -63.1 (s, 3F). <sup>13</sup>C NMR (126 MHz, CDCl<sub>3</sub>) δ 167.4 (s), 144.3 (s), 139.7 (s), 132.4 (q, *J* = 33.4 Hz), 129.6 (s), 128.7 (s), 128.1 (s), 124.3 (s), 123.1 (q, *J* = 273.2 Hz), 122.3 (d, *J* = 30.0 Hz), 61.5 (s), 32.5 (s). Mp 95-97 °C. HRMS ESI (m/z): [M+Na]<sup>+</sup> calcd for C<sub>12</sub>H<sub>11</sub>F<sub>4</sub>NO<sub>4</sub>SNa: 364.0237, found: 364.0234.

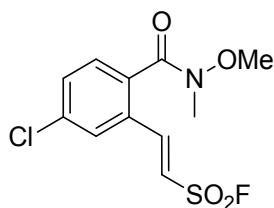

(*E*)-2-(5-chloro-2-(methoxy(methyl)carbamoyl)phenyl)ethenesulfonyl fluoride (**3p**). Petroleum ether / ethyl acetate = 5 : 1 (v / v) as eluent for column chromatography. White solid, 110.8 mg, 72% yield. <sup>1</sup>H NMR (500 MHz, CDCl<sub>3</sub>) δ 7.83 (d, *J* = 15.5 Hz, 1H), 7.60 (s, 1H), 7.50 (d, *J* = 8.3 Hz, 1H), 7.45 (d, *J* = 8.2 Hz, 1H), 6.89 (d, *J* = 15.4 Hz, 1H), 3.44 (s, 3H), 3.35 (s, 3H). <sup>19</sup>F NMR (471 MHz, CDCl<sub>3</sub>) δ 61.7 (s, 1F). <sup>13</sup>C NMR (126 MHz, CDCl<sub>3</sub>) δ 167.5 (s), 144.6 (s), 136.3 (s), 134.7 (s), 131.6 (s), 130.5 (s), 129.5 (s), 127.3 (s), 121.6 (d, *J* = 28.8 Hz), 61.4 (s), 32.7 (s). Mp 92-94 °C. HRMS ESI (*m/z*): [M+Na]<sup>+</sup> calcd for C<sub>11</sub>H<sub>11</sub>ClFNO<sub>4</sub>SNa: 329.9974, found: 329.9973, 331.9945.

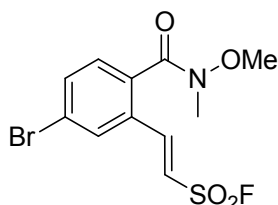

(*E*)-2-(5-bromo-2-(methoxy(methyl)carbamoyl)phenyl)ethenesulfonyl fluoride (**3q**). Petroleum ether / ethyl acetate = 5 : 1 (v / v) as eluent for column chromatography. Yellow solid, 142.6 mg, 81% yield. <sup>1</sup>H NMR (500 MHz, CDCl<sub>3</sub>) δ 7.82 (d, *J* = 15.5 Hz, 1H), 7.76 (s, 1H), 7.66 (d, *J* = 8.2 Hz, 1H), 7.38 (d, *J* = 8.2 Hz, 1H), 6.88 (d, *J* = 15.6 Hz, 1H), 3.44 (s, 3H), 3.36 (s, 3H). <sup>19</sup>F NMR (471 MHz, CDCl<sub>3</sub>) δ 61.8 (s, 1F). <sup>13</sup>C NMR (126 MHz, CDCl<sub>3</sub>) δ 167.6 (s), 144.5 (s), 135.2 (s), 134.5 (s), 130.7 (s), 130.2 (s), 129.6 (s), 124.3 (s), 121.6 (d, *J* = 29.0 Hz), 61.5 (s), 32.7 (s). Mp 93-95 °C. HRMS ESI (*m/z*): [M+Na]<sup>+</sup> calcd for C<sub>11</sub>H<sub>11</sub>BrFNO<sub>4</sub>SNa: 373.9468, found: 373.9466, 375.9448.

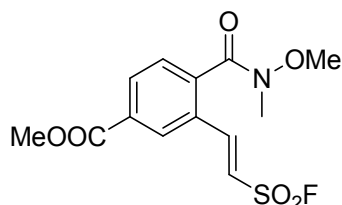

(*E*)-methyl 3-(2-(fluorosulfonyl)vinyl)-4-(methoxy(methyl)carbamoyl)benzoate (**3r**). Petroleum ether / ethyl acetate = 3 : 1 (v / v) as eluent for column chromatography. White solid, 129.2 mg, 78% yield. <sup>1</sup>H NMR (500 MHz, CDCl<sub>3</sub>) δ 8.29 (s, 1H), 8.18 (d, *J* = 8.0 Hz, 1H), 7.87 (d, *J* = 15.5 Hz, 1H), 7.57 (d, *J* = 8.0 Hz, 1H), 6.98 (d, *J* = 15.3 Hz, 1H), 3.97 (s, 3H), 3.39 (s, 6H). <sup>19</sup>F NMR (471 MHz, CDCl<sub>3</sub>) δ 61.7 (s, 1F). <sup>13</sup>C NMR (126 MHz, CDCl<sub>3</sub>) δ 167.8 (s), 165.3 (s), 144.9 (s), 140.4 (s), 132.3 (s),

131.8 (s), 129.0 (s), 128.5 (s), 128.2 (s), 121.5 (d,  $J = 26.7$  Hz), 61.5 (s), 52.7 (s), 32.5 (s). Mp 110-112 °C. HRMS ESI (m/z):  $[M+Na]^+$  calcd for  $C_{13}H_{14}FNO_6SNa$ : 354.0418, found: 354.0415.

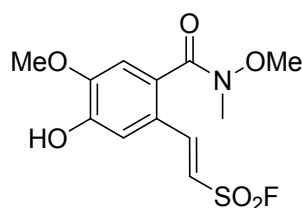

(*E*)-2-(5-hydroxy-4-methoxy-2-(methoxy(methyl)carbamoyl)phenyl)ethenesulfonyl fluoride (**3s**). Petroleum ether / ethyl acetate = 2 : 1 (v /v) as eluent for column chromatography. Brown solid, 87.8 mg, 55% yield.  $^1H$  NMR (500 MHz, DMSO- $d_6$ )  $\delta$  9.76 (s, 1H), 7.66 (s, 2H), 7.39 (s, 1H), 7.09 (s, 1H), 3.88 (s, 3H), 3.52 (s, 3H), 3.25 (s, 3H).  $^{19}F$  NMR (471 MHz, DMSO- $d_6$ )  $\delta$  63.0 (s, 1F).  $^{13}C$  NMR (126 MHz, DMSO- $d_6$ )  $\delta$  172.5 (s), 156.3 (s), 153.0 (s), 150.8 (s), 135.3 (s), 126.2 (s), 122.2 (d,  $J = 25.5$  Hz), 118.9 (d,  $J = 6.1$  Hz), 115.9 (s), 66.1 (s), 61.3 (s), 38.4 (s). Mp 88-89 °C. HRMS ESI (m/z):  $[M+Na]^+$  calcd for  $C_{12}H_{14}FNO_6SNa$ : 324.0418, found: 324.0414.

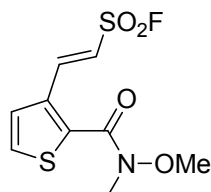

(*E*)-2-(2-(methoxy(methyl)carbamoyl)thiophen-3-yl)ethenesulfonyl fluoride (**3t**). Petroleum ether / ethyl acetate = 2 : 1 (v /v) as eluent for column chromatography. White solid, 93.6 mg, 67% yield.  $^1H$  NMR (500 MHz,  $CDCl_3$ )  $\delta$  8.71 (d,  $J = 15.6$  Hz, 1H), 7.54 (d,  $J = 5.3$  Hz, 1H), 7.30 (d,  $J = 5.3$  Hz, 1H), 6.75 (d,  $J = 15.6$  Hz, 1H), 3.71 (s, 3H), 3.37 (s, 3H).  $^{19}F$  NMR (471 MHz,  $CDCl_3$ )  $\delta$  62.5 (s, 1F).  $^{13}C$  NMR (126 MHz,  $CDCl_3$ )  $\delta$  161.7 (s), 142.5 (d,  $J = 2.6$  Hz), 138.2 (s), 133.5 (s), 130.9 (s), 125.7 (s), 119.8 (d,  $J = 28.1$  Hz), 61.8 (s), 33.1 (s). Mp 100-101 °C. HRMS ESI (m/z):  $[M+Na]^+$  calcd for  $C_9H_{10}FNO_4S_2Na$ : 301.9928, found: 301.9924.

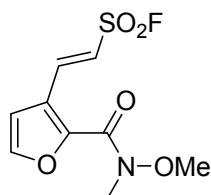

(*E*)-2-(2-(methoxy(methyl)carbamoyl)furan-3-yl)ethenesulfonyl fluoride (**3u**). Petroleum ether / ethyl acetate = 2 : 1 (v /v) as eluent for column chromatography. White solid, 110.5 mg, 84% yield.  $^1H$  NMR (500 MHz,  $CDCl_3$ )  $\delta$  8.35 (d,  $J = 15.6$  Hz, 1H), 7.53 (d,  $J = 1.7$  Hz, 1H), 6.75 (d,  $J = 15.6$  Hz, 1H), 6.70 (d,  $J = 1.7$  Hz, 1H), 3.82 (s, 3H), 3.34 (s, 3H).  $^{19}F$  NMR (471 MHz,  $CDCl_3$ )  $\delta$  62.2 (s, 1F).  $^{13}C$  NMR (126 MHz,  $CDCl_3$ )  $\delta$  159.3 (s), 146.9 (s), 144.6 (s), 139.5 (s), 124.3 (s), 120.4 (d,  $J = 28.7$

Hz), 109.2 (s), 62.2 (s), 33.7 (s). Mp 95-97 °C. HRMS ESI (m/z): [M+Na]<sup>+</sup> calcd for C<sub>9</sub>H<sub>10</sub>FNO<sub>5</sub>SNa: 286.0156, found: 286.0152.

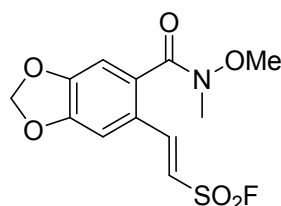

(*E*)-2-(6-(methoxy(methyl)carbamoyl)benzo[d][1,3]dioxol-5-yl)ethenesulfonyl fluoride (**3v**). Petroleum ether / ethyl acetate = 2 : 1 (v /v) as eluent for column chromatography. Yellow oil, 71.4 mg, 45% yield. <sup>1</sup>H NMR (500 MHz, CDCl<sub>3</sub>) δ 7.68 (d, *J* = 15.4 Hz, 1H), 7.27 (d, *J* = 15.3 Hz, 1H), 7.01 (d, *J* = 8.0 Hz, 1H), 6.94 (d, *J* = 8.0 Hz, 1H), 6.18 (s, 2H), 3.49 (s, 3H), 3.34 (s, 3H). <sup>19</sup>F NMR (471 MHz, CDCl<sub>3</sub>) δ 61.9 (s, 1F). <sup>13</sup>C NMR (126 MHz, CDCl<sub>3</sub>) δ 167.7 (s), 149.0 (s), 147.6 (s), 140.6 (s), 129.9 (s), 122.3 (d, *J* = 28.0 Hz), 122.1 (s), 111.9 (s), 110.9 (s), 102.6 (s), 61.3 (s), 33.2 (s). HRMS ESI (m/z): [M+Na]<sup>+</sup> calcd for C<sub>12</sub>H<sub>12</sub>FNO<sub>6</sub>SNa: 340.0262, found: 340.0258.

#### 4. Procedures for the synthesis of 5

An oven-dried screw cap test tube was charged with *N*-methoxy-*N*-methylbenzamide (**1**, 0.5 mmol), ethenesulfonyl fluoride (ESF, **2**, 0.75 mmol, 1.5 equiv.), [Cp\*RhCl<sub>2</sub>]<sub>2</sub> (2.5 mol%), AgSbF<sub>6</sub> (0.5 mmol, 1 equiv.), Cu(OAc)<sub>2</sub> (20 mol%) and 1,4-dioxane (5 mL) under an air atmosphere. The resulting mixture was stirred at 100 °C for 15 h before concentrating under vacuum. The residue was purified by column chromatography on silica gel using a mixture of petroleum ether and ethyl acetate as eluents to give the desired products (**5**).

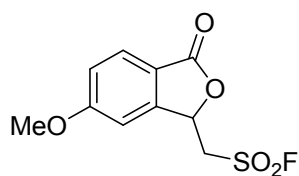

(6-Methoxy-3-oxo-1,3-dihydroisobenzofuran-1-yl)methanesulfonyl fluoride (**5a**). Petroleum ether / ethyl acetate = 3 : 1 (v /v) as eluent for column chromatography. White solid, 98.9 mg, 76% yield. <sup>1</sup>H NMR (500 MHz, DMSO-d<sub>6</sub>) δ 7.79 (d, *J* = 8.5 Hz, 1H), 7.44 (s, 1H), 7.18 (d, *J* = 8.5 Hz, 1H), 6.03 (d, *J* = 8.5 Hz, 1H), 5.02 (dd, *J* = 15.1, 9.6 Hz, 1H), 4.61 (dd, *J* = 15.2, 9.4 Hz, 1H), 3.89 (s, 3H). <sup>19</sup>F NMR (471 MHz, DMSO) δ 61.0 (d, *J* = 9.8 Hz, 1F). <sup>13</sup>C NMR (126 MHz, DMSO-d<sub>6</sub>) δ 169.0 (s), 165.0 (s), 149.8 (s), 127.2 (s), 118.0 (s), 117.7 (s), 107.9 (s), 74.3 (s), 56.5 (s), 53.9 (d, *J* = 13.8 Hz). Mp 175-177 °C. HRMS ESI (m/z): [M+Na]<sup>+</sup> calcd for C<sub>10</sub>H<sub>9</sub>FO<sub>5</sub>SNa: 283.0047, found: 283.0047.

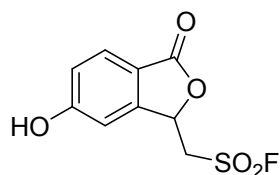

(6-Hydroxy-3-oxo-1,3-dihydroisobenzofuran-1-yl)methanesulfonyl fluoride (**5b**). Petroleum ether / ethyl acetate = 2 : 1 (v /v) as eluent for column chromatography. White solid, 83.7 mg, 68% yield.  $^1\text{H}$  NMR (500 MHz, DMSO- $d_6$ )  $\delta$  10.86 (s, 1H), 7.70 (d,  $J$  = 8.4 Hz, 1H), 7.13 (s, 1H), 7.01 (d,  $J$  = 8.4 Hz, 1H), 5.95 (d,  $J$  = 9.0 Hz, 1H), 4.97 (dd,  $J$  = 15.0, 10.2 Hz, 1H), 4.57 (dd,  $J$  = 15.2, 9.3 Hz, 1H).  $^{19}\text{F}$  NMR (471 MHz, DMSO- $d_6$ )  $\delta$  61.4 (d,  $J$  = 10.1 Hz, 1F).  $^{13}\text{C}$  NMR (126 MHz, DMSO- $d_6$ )  $\delta$  169.1 (s), 163.9 (s), 149.8 (s), 127.5 (s), 118.6 (s), 116.1 (s), 109.6 (s), 74.0 (s), 54.0 (d,  $J$  = 13.5 Hz). Mp 213-214 °C. HRMS ESI (m/z):  $[\text{M}+\text{Na}]^+$  calcd for  $\text{C}_9\text{H}_7\text{FO}_5\text{SNa}$ : 268.9890, found: 268.9891.

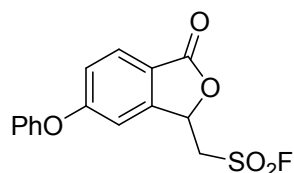

(3-Oxo-6-phenoxy-1,3-dihydroisobenzofuran-1-yl)methanesulfonyl fluoride (**5c**). Petroleum ether / ethyl acetate = 2 : 1 (v /v) as eluent for column chromatography. White solid, 106.4 mg, 66% yield.  $^1\text{H}$  NMR (500 MHz,  $\text{CDCl}_3$ )  $\delta$  7.87 (d,  $J$  = 8.5 Hz, 1H), 7.45 (t,  $J$  = 7.6 Hz, 2H), 7.27 (t,  $J$  = 7.5 Hz, 1H), 7.19 (dd,  $J$  = 8.5, 1.9 Hz, 1H), 7.10 (d,  $J$  = 8.4 Hz, 2H), 7.04 (s, 1H), 5.85 (dd,  $J$  = 8.0, 3.2 Hz, 1H), 3.94 (ddd,  $J$  = 15.2, 8.3, 3.5 Hz, 1H), 3.78 (dd,  $J$  = 15.3, 8.1 Hz, 1H).  $^{19}\text{F}$  NMR (471 MHz,  $\text{CDCl}_3$ )  $\delta$  61.2 (d,  $J$  = 8.2 Hz, 1F).  $^{13}\text{C}$  NMR (126 MHz,  $\text{CDCl}_3$ )  $\delta$  168.0 (s), 164.2 (s), 154.6 (s), 148.0 (s), 130.5 (s), 128.2 (s), 125.7 (s), 120.6 (s), 120.2 (s), 119.1 (s), 109.9 (s), 73.3 (s), 54.6 (d,  $J$  = 17.5 Hz). Mp 118-120 °C. HRMS ESI (m/z):  $[\text{M}+\text{Na}]^+$  calcd for  $\text{C}_{15}\text{H}_{11}\text{FO}_5\text{SNa}$ : 345.0203, found: 345.0200.

## 5. Procedures for the synthesis of 7

An oven-dried screw cap test tube was charged with *N*-methoxybenzamide (**6**, 0.5 mmol), ethenesulfonyl fluoride (ESF, **2**, 0.75 mmol, 1.5 equiv.),  $[\text{Cp}^*\text{RhCl}_2]_2$  (2.5 mol%),  $\text{AgSbF}_6$  (0.5 mmol, 1 equiv.),  $\text{Cu}(\text{OAc})_2$  (20 mol%) and 1,4-dioxane (5 mL) under an air atmosphere. The resulting mixture was stirred at 80 °C for 15 h before concentrating under vacuum. The residue was purified by column chromatography on silica gel using a mixture of petroleum ether and ethyl acetate as eluents to give the desired products (**7**).

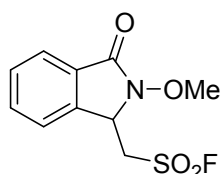



(2-Methoxy-3-oxoisindolin-1-yl)methanesulfonyl fluoride (**7a**). Petroleum ether / ethyl acetate = 3 : 1 (v/v) as eluent for column chromatography. Yellow solid, 118.0 mg, 91% yield. <sup>1</sup>H NMR (500 MHz, CDCl<sub>3</sub>) δ 7.89 (d, *J* = 7.6 Hz, 1H), 7.69-7.63 (m, 2H), 7.58 (t, *J* = 7.3 Hz, 1H), 5.25 (dd, *J* = 6.4, 4.3 Hz, 1H), 4.14 (dt, *J* = 15.2, 3.6 Hz, 1H), 4.03 (s, 3H), 3.74 (dt, *J* = 15.3, 4.8 Hz, 1H). <sup>19</sup>F NMR (471 MHz, CDCl<sub>3</sub>) δ 61.6 (s, 1F). <sup>13</sup>C NMR (126 MHz, CDCl<sub>3</sub>) δ 164.8 (s), 138.7 (s), 133.2 (s), 130.1 (s), 129.3 (s), 124.4 (s), 123.4 (s), 64.2 (s), 54.6 (s), 52.2 (d, *J* = 16.8 Hz). Mp 89-90 °C. HRMS ESI (m/z): [M+Na]<sup>+</sup> calcd for C<sub>10</sub>H<sub>10</sub>FNO<sub>4</sub>SNa: 282.0207, found: 282.0205.

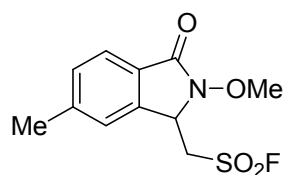

(2-Methoxy-6-methyl-3-oxoisindolin-1-yl)methanesulfonyl fluoride (**7b**). Petroleum ether / ethyl acetate = 3 : 1 (v/v) as eluent for column chromatography. Yellow solid, 106.6 mg, 78% yield. <sup>1</sup>H NMR (500 MHz, CDCl<sub>3</sub>) δ 7.75 (d, *J* = 7.8 Hz, 1H), 7.42 (s, 1H), 7.37 (d, *J* = 7.8 Hz, 1H), 5.19 (t, *J* = 4.8 Hz, 1H), 4.11 (dt, *J* = 15.0, 3.2 Hz, 1H), 4.01 (s, 3H), 3.73 (dt, *J* = 15.1, 4.9 Hz, 1H), 2.48 (s, 3H). <sup>19</sup>F NMR (471 MHz, CDCl<sub>3</sub>) δ 61.5 (s, 1F). <sup>13</sup>C NMR (126 MHz, CDCl<sub>3</sub>) δ 165.2 (s), 144.4 (s), 139.2 (s), 131.0 (s), 126.5 (s), 124.3 (s), 123.7 (s), 64.2 (s), 54.6 (s), 52.4 (d, *J* = 16.8 Hz), 22.1 (s). Mp 123-124 °C. HRMS ESI (m/z): [M+Na]<sup>+</sup> calcd for C<sub>11</sub>H<sub>12</sub>FNO<sub>4</sub>SNa: 296.0363, found: 296.0360.

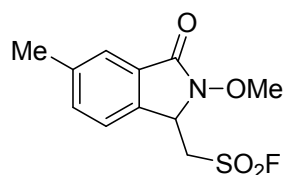

(2-Methoxy-5-methyl-3-oxoisindolin-1-yl)methanesulfonyl fluoride (**7c**). Petroleum ether / ethyl acetate = 3 : 1 (v/v) as eluent for column chromatography. Yellow solid, 103.9 mg, 76% yield. <sup>1</sup>H NMR (500 MHz, CDCl<sub>3</sub>) δ 7.63 (s, 1H), 7.49 (d, *J* = 7.9 Hz, 1H), 7.43 (d, *J* = 7.8 Hz, 1H), 5.18 (t, *J* = 5.0 Hz, 1H), 4.10 (dt, *J* = 15.2, 3.5 Hz, 1H), 3.99 (s, 3H), 3.75 (dt, *J* = 15.0, 4.9 Hz, 1H), 2.42 (s, 3H). <sup>19</sup>F NMR (471 MHz, CDCl<sub>3</sub>) δ 61.8 (s, 1F). <sup>13</sup>C NMR (126 MHz, CDCl<sub>3</sub>) δ 165.1 (s), 140.4 (s), 135.9 (s), 134.1 (s), 129.2 (s), 124.5 (s), 123.1 (s), 64.1 (s), 54.5 (s), 52.3 (d, *J* = 16.5 Hz), 21.4 (s). Mp 114-116 °C. HRMS ESI (m/z): [M+Na]<sup>+</sup> calcd for C<sub>11</sub>H<sub>12</sub>FNO<sub>4</sub>SNa: 296.0363, found: 296.0358.

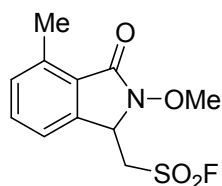

(2-Methoxy-4-methyl-3-oxoisindolin-1-yl)methanesulfonyl fluoride (**7d**). Petroleum ether / ethyl acetate = 3 : 1 (v / v) as eluent for column chromatography. Brown solid, 60.1 mg, 44% yield. <sup>1</sup>H NMR (500 MHz, CDCl<sub>3</sub>) δ 7.50 (t, *J* = 7.6 Hz, 1H), 7.40 (d, *J* = 7.6 Hz, 1H), 7.29 (d, *J* = 7.6 Hz, 1H), 5.17 (t, *J* = 5.2 Hz, 1H), 4.08 (dt, *J* = 15.1, 3.7 Hz, 1H), 4.00 (s, 3H), 3.76 (dt, *J* = 15.2, 5.3 Hz, 1H), 2.67 (s, 3H). <sup>19</sup>F NMR (471 MHz, CDCl<sub>3</sub>) δ 61.7 (s, 1F). <sup>13</sup>C NMR (126 MHz, CDCl<sub>3</sub>) δ 166.4 (s), 139.4 (s), 138.9 (s), 132.7 (s), 131.9 (s), 126.2 (s), 120.6 (s), 64.1 (s), 54.3 (s), 52.6 (d, *J* = 16.5 Hz), 17.2 (s). Mp 89-91 °C. HRMS ESI (m/z): [M+Na]<sup>+</sup> calcd for C<sub>11</sub>H<sub>12</sub>FNO<sub>4</sub>SNa: 296.0363, found: 296.0358.

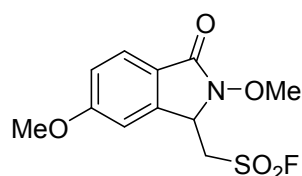

(2,6-Dimethoxy-3-oxoisindolin-1-yl)methanesulfonyl fluoride (**7e**). Petroleum ether / ethyl acetate = 2 : 1 (v / v) as eluent for column chromatography. Yellow solid, 94.0 mg, 65% yield. <sup>1</sup>H NMR (500 MHz, CDCl<sub>3</sub>) δ 7.77 (d, *J* = 8.5 Hz, 1H), 7.11 (s, 1H), 7.05 (d, *J* = 8.5 Hz, 1H), 5.17 (dd, *J* = 6.4, 4.3 Hz, 1H), 4.13 (dt, *J* = 15.2, 3.3 Hz, 1H), 3.99 (s, 3H), 3.88 (s, 3H), 3.73 (dt, *J* = 15.1, 5.0 Hz, 1H). <sup>19</sup>F NMR (471 MHz, CDCl<sub>3</sub>) δ 61.5 (s, 1F). <sup>13</sup>C NMR (126 MHz, CDCl<sub>3</sub>) δ 165.6 (s), 164.0 (s), 141.3 (s), 126.1 (s), 121.2 (s), 116.5 (s), 108.4 (s), 64.3 (s), 55.9 (s), 54.7 (s), 52.4 (d, *J* = 16.9 Hz). Mp 128-129 °C. HRMS ESI (m/z): [M+Na]<sup>+</sup> calcd for C<sub>11</sub>H<sub>12</sub>FNO<sub>5</sub>SNa: 312.0312, found: 312.0308.

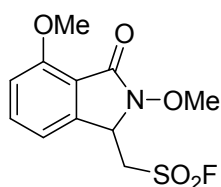

(2,4-Dimethoxy-3-oxoisindolin-1-yl)methanesulfonyl fluoride (**7f**). Petroleum ether / ethyl acetate = 2 : 1 (v / v) as eluent for column chromatography. Yellow solid, 92.6 mg, 64% yield. <sup>1</sup>H NMR (500 MHz, CDCl<sub>3</sub>) δ 7.60 (t, *J* = 8.0 Hz, 1H), 7.16 (d, *J* = 7.6 Hz, 1H), 7.00 (d, *J* = 8.4 Hz, 1H), 5.15 (t, *J* = 5.0 Hz, 1H), 4.09 (dt, *J* = 15.2, 3.8 Hz, 1H), 4.00 (s, 3H), 3.98 (s, 3H), 3.74 (dt, *J* = 15.2, 5.3 Hz, 1H). <sup>19</sup>F NMR (471 MHz, CDCl<sub>3</sub>) δ 61.7 (s, 1F). <sup>13</sup>C NMR (126 MHz, CDCl<sub>3</sub>) δ 164.9 (s), 157.8 (s), 141.3 (s), 135.1 (s), 116.2 (s), 115.1 (s), 112.2 (s), 64.1 (s), 56.1 (s), 54.5 (s), 52.5 (d, *J* = 16.7 Hz). Mp 120-122 °C. HRMS ESI (m/z): [M+Na]<sup>+</sup> calcd for C<sub>11</sub>H<sub>12</sub>FNO<sub>5</sub>SNa: 312.0312, found: 312.0308.

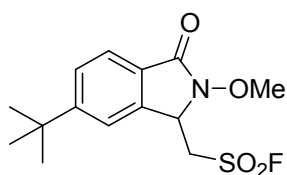

(6-(Tert-butyl)-2-methoxy-3-oxoisindolin-1-yl)methanesulfonyl fluoride (**7g**). Petroleum ether / ethyl acetate = 3 : 1 (v /v) as eluent for column chromatography. Brown solid, 99.4 mg, 63% yield.  $^1\text{H}$  NMR (500 MHz,  $\text{CDCl}_3$ )  $\delta$  7.78 (d,  $J$  = 8.1 Hz, 1H), 7.63 (s, 1H), 7.60 (d,  $J$  = 8.2 Hz, 1H), 5.22 (t,  $J$  = 5.2 Hz, 1H), 4.14 (dt,  $J$  = 15.0, 3.5 Hz, 1H), 4.00 (s, 3H), 3.74 (dt,  $J$  = 15.4, 5.6 Hz, 1H), 1.35 (s, 9H).  $^{19}\text{F}$  NMR (471 MHz,  $\text{CDCl}_3$ )  $\delta$  61.7 (s, 1F).  $^{13}\text{C}$  NMR (126 MHz,  $\text{CDCl}_3$ )  $\delta$  165.1 (s), 157.7 (s), 138.9 (s), 127.4 (s), 126.4 (s), 124.1 (s), 120.3 (s), 64.2 (s), 54.7 (s), 52.5 (d,  $J$  = 16.7 Hz), 35.7 (s), 31.2 (s). Mp 121-123 °C. HRMS ESI (m/z):  $[\text{M}+\text{Na}]^+$  calcd for  $\text{C}_{14}\text{H}_{18}\text{FNO}_4\text{SNa}$ : 338.0833, found: 338.0828.

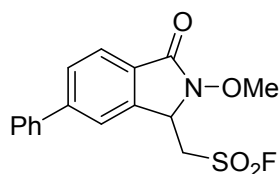

(2-Methoxy-3-oxo-6-phenylisindolin-1-yl)methanesulfonyl fluoride (**7h**). Petroleum ether / ethyl acetate = 3 : 1 (v /v) as eluent for column chromatography. White solid, 87.2 mg, 52% yield.  $^1\text{H}$  NMR (500 MHz,  $\text{CDCl}_3$ )  $\delta$  7.93 (d,  $J$  = 7.9 Hz, 1H), 7.83 (s, 1H), 7.78 (d,  $J$  = 7.9 Hz, 1H), 7.60 (d,  $J$  = 7.4 Hz, 2H), 7.49 (t,  $J$  = 7.4 Hz, 2H), 7.43 (t,  $J$  = 7.3 Hz, 1H), 5.30 (dd,  $J$  = 6.4, 4.3 Hz, 1H), 4.18 (dt,  $J$  = 15.1, 3.5 Hz, 1H), 4.04 (s, 3H), 3.78 (dt,  $J$  = 15.1, 5.5 Hz, 1H).  $^{19}\text{F}$  NMR (471 MHz,  $\text{CDCl}_3$ )  $\delta$  61.7 (s, 1F).  $^{13}\text{C}$  NMR (126 MHz,  $\text{CDCl}_3$ )  $\delta$  164.9 (s), 146.7 (s), 139.6 (s), 139.5 (s), 129.2 (s), 129.1 (s), 128.7 (s), 127.8 (s), 127.4 (s), 124.8 (s), 122.0 (s), 64.3 (s), 54.7 (s), 52.3 (d,  $J$  = 17.0 Hz). Mp 116-117 °C. HRMS ESI (m/z):  $[\text{M}+\text{Na}]^+$  calcd for  $\text{C}_{16}\text{H}_{14}\text{FNO}_4\text{SNa}$ : 358.0520, found: 358.0516.

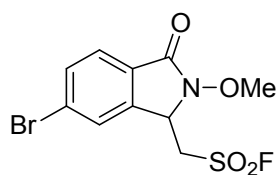

(6-Bromo-2-methoxy-3-oxoisindolin-1-yl)methanesulfonyl fluoride (**7i**). Petroleum ether / ethyl acetate = 3 : 1 (v /v) as eluent for column chromatography. Yellow solid, 52.4 mg, 31% yield.  $^1\text{H}$  NMR (500 MHz,  $\text{CDCl}_3$ )  $\delta$  7.81 (s, 1H), 7.76-7.71 (m, 2H), 5.22 (dd,  $J$  = 6.1, 4.0 Hz, 1H), 4.15-4.09 (m, 1H), 4.02 (s, 3H), 3.77-3.71 (m, 1H).  $^{19}\text{F}$  NMR (471 MHz,  $\text{CDCl}_3$ )  $\delta$  61.6 (s).  $^{13}\text{C}$  NMR (126 MHz,  $\text{CDCl}_3$ )  $\delta$  163.9 (s), 140.4 (s), 133.7 (s), 128.2 (s), 128.0 (s), 126.9 (s), 125.9 (s), 64.4 (s), 54.2 (s), 51.9 (d,  $J$  = 17.4 Hz). Mp 150-152 °C. HRMS ESI (m/z):  $[\text{M}+\text{Na}]^+$  calcd for  $\text{C}_{10}\text{H}_9\text{BrFNO}_4\text{SNa}$ : 359.9312, found: 359.9312, 361.9290.

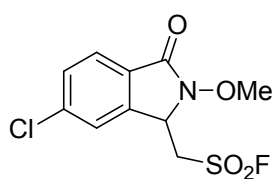

(6-Chloro-2-methoxy-3-oxoisindolin-1-yl)methanesulfonyl fluoride (**7j**). Petroleum ether / ethyl acetate = 3 : 1 (v /v) as eluent for column chromatography. Yellow solid, 54.3 mg, 37% yield.  $^1\text{H}$  NMR (500 MHz,  $\text{CDCl}_3$ )  $\delta$  7.82 (d,  $J = 8.1$  Hz, 1H), 7.65 (s, 1H), 7.56 (d,  $J = 8.0$  Hz, 1H), 5.22 (dd,  $J = 6.7, 3.9$  Hz, 1H), 4.15 (dt,  $J = 5.9, 3.3$  Hz, 1H), 4.03 (s, 3H), 3.74 (dt,  $J = 15.0, 5.5$  Hz, 1H).  $^{19}\text{F}$  NMR (471 MHz,  $\text{CDCl}_3$ )  $\delta$  61.6 (s, 1F).  $^{13}\text{C}$  NMR (126 MHz,  $\text{CDCl}_3$ )  $\delta$  163.8 (s), 140.3 (s), 139.8 (s), 130.8 (s), 127.7 (s), 125.8 (s), 124.0 (s), 64.4 (s), 54.3 (s), 51.9 (d,  $J = 17.4$  Hz). Mp 153-155 °C. HRMS ESI (m/z):  $[\text{M}+\text{Na}]^+$  calcd for  $\text{C}_{10}\text{H}_9\text{ClFNO}_4\text{SNa}$ : 315.9817, found: 315.9816, 317.9784.

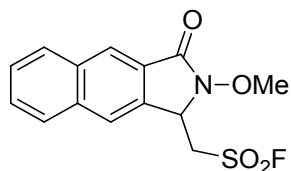

(2-Methoxy-3-oxo-2,3-dihydro-1H-benzo[f]isoindol-1-yl)methanesulfonyl fluoride (**7k**). Petroleum ether / ethyl acetate = 2 : 1 (v /v) as eluent for column chromatography. Yellow solid, 92.8 mg, 60% yield.  $^1\text{H}$  NMR (500 MHz,  $\text{CDCl}_3$ )  $\delta$  8.42 (s, 1H), 8.09 (s, 1H), 8.02 (d,  $J = 8.0$  Hz, 1H), 7.97 (d,  $J = 8.0$  Hz, 1H), 7.67 – 7.61 (m, 2H), 5.41 (t,  $J = 5.7$  Hz, 1H), 4.22 (dt,  $J = 15.0, 3.0$  Hz, 1H), 4.08 (s, 3H), 3.79 (dt,  $J = 15.3, 5.4$  Hz, 1H).  $^{19}\text{F}$  NMR (471 MHz,  $\text{CDCl}_3$ )  $\delta$  61.6 (s, 1F).  $^{13}\text{C}$  NMR (126 MHz,  $\text{CDCl}_3$ )  $\delta$  164.3 (s), 135.4 (s), 133.5 (s), 133.4 (s), 129.6 (s), 128.7 (s), 128.6 (s), 127.7 (s), 126.1 (s), 125.3 (s), 123.1 (s), 64.2 (s), 54.4 (s), 52.8 (d,  $J = 16.6$  Hz). Mp 181-182 °C. HRMS ESI (m/z):  $[\text{M}+\text{Na}]^+$  calcd for  $\text{C}_{14}\text{H}_{12}\text{FNO}_4\text{SNa}$ : 332.0363, found: 332.0360.

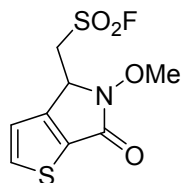

(5-Methoxy-6-oxo-5,6-dihydro-4H-thieno[2,3-c]pyrrol-4-yl)methanesulfonyl fluoride (**7l**). Petroleum ether / ethyl acetate = 2 : 1 (v /v) as eluent for column chromatography. Yellow oil, 54.4 mg, 41% yield.  $^1\text{H}$  NMR (500 MHz,  $\text{CDCl}_3$ )  $\delta$  7.81 (d,  $J = 4.9$  Hz, 1H), 7.25 (d,  $J = 4.8$  Hz, 1H), 5.14 (dd,  $J = 8.7, 3.5$  Hz, 1H), 4.19 (dt,  $J = 14.9, 3.7$  Hz, 1H), 4.01 (s, 3H), 3.64 (ddd,  $J = 14.8, 8.7, 4.2$  Hz, 1H).  $^{19}\text{F}$  NMR (471 MHz,  $\text{CDCl}_3$ )  $\delta$  61.1 (s, 1F).  $^{13}\text{C}$  NMR (126 MHz,  $\text{CDCl}_3$ )  $\delta$  162.8 (s), 148.6 (s),

136.8 (s), 132.7 (s), 122.2 (d,  $J = 1.8$  Hz), 64.9 (s), 55.1 (s), 51.8 (d,  $J = 17.1$  Hz). HRMS ESI (m/z):  $[M+Na]^+$  calcd for  $C_8H_8FNO_4S_2$ : 287.9771, found: 287.9770.

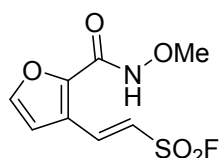

(*E*)-2-(2-(methoxycarbonyl)furan-3-yl)ethenesulfonyl fluoride (**7m**). Petroleum ether / ethyl acetate = 2 : 1 (v / v) as eluent for column chromatography. White solid, 47.3 mg, 38% yield (reaction temperature was 80 °C); 79.7 mg, 64% yield (reaction temperature was 100 °C).  $^1H$  NMR (500 MHz,  $CDCl_3$ )  $\delta$  9.17 (s, 1H), 8.51 (d,  $J = 15.6$  Hz, 1H), 7.48 (s, 1H), 6.91 (d,  $J = 15.7$  Hz, 1H), 6.73 (s, 1H), 3.89 (s, 3H).  $^{19}F$  NMR (471 MHz,  $CDCl_3$ )  $\delta$  62.0 (s).  $^{13}C$  NMR (126 MHz,  $CDCl_3$ )  $\delta$  159.4 (s), 144.6 (s), 144.5 (s), 138.8 (s), 138.2 (s), 122.0 (d,  $J = 29.2$  Hz), 110.3 (s), 65.2 (s). Mp 138-139 °C. HRMS ESI (m/z):  $[M+Na]^+$  calcd for  $C_8H_8FNO_5SNa$ : 271.9999, found: 271.9996.

## 6. Competition reaction between methyl acrylate and ESF as coupling partners in the Rh(III)-catalyzed C-H coupling reaction.

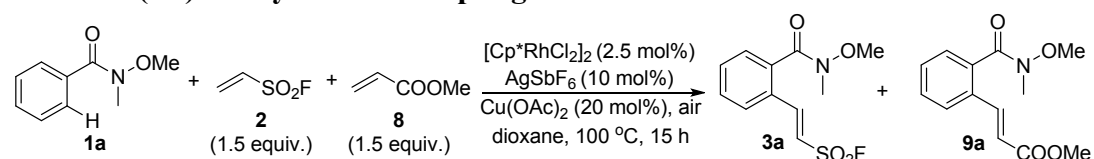

An oven-dried screw cap test tube was charged with *N*-methoxy-*N*-methylbenzamide (**1a**, 0.5 mmol), ethenesulfonyl fluoride (ESF, **2**, 0.75 mmol, 1.5 equiv.), methyl acrylate (**8**, 0.75 mmol),  $[Cp^*RhCl_2]_2$  (2.5 mol%),  $AgSbF_6$  (10 mol%),  $Cu(OAc)_2$  (20 mol%) and 1,4-dioxane (5 mL) under an air atmosphere. The resulting mixture was stirred at 100 °C for 15 h before concentrating under vacuum. The residue was purified by column chromatography on silica gel using a mixture of petroleum ether and ethyl acetate as eluents to give a mixture of **3a** and **9a**.

The chemical shifts of two olefin protons of **3a** are 7.88 ppm and 6.87 ppm. The chemical shifts of two olefin protons of **9a** are 7.73 ppm and 6.41 ppm.<sup>[3]</sup> The ratio of **3a** and **9a** is 1:1 from the  $^1H$  NMR.

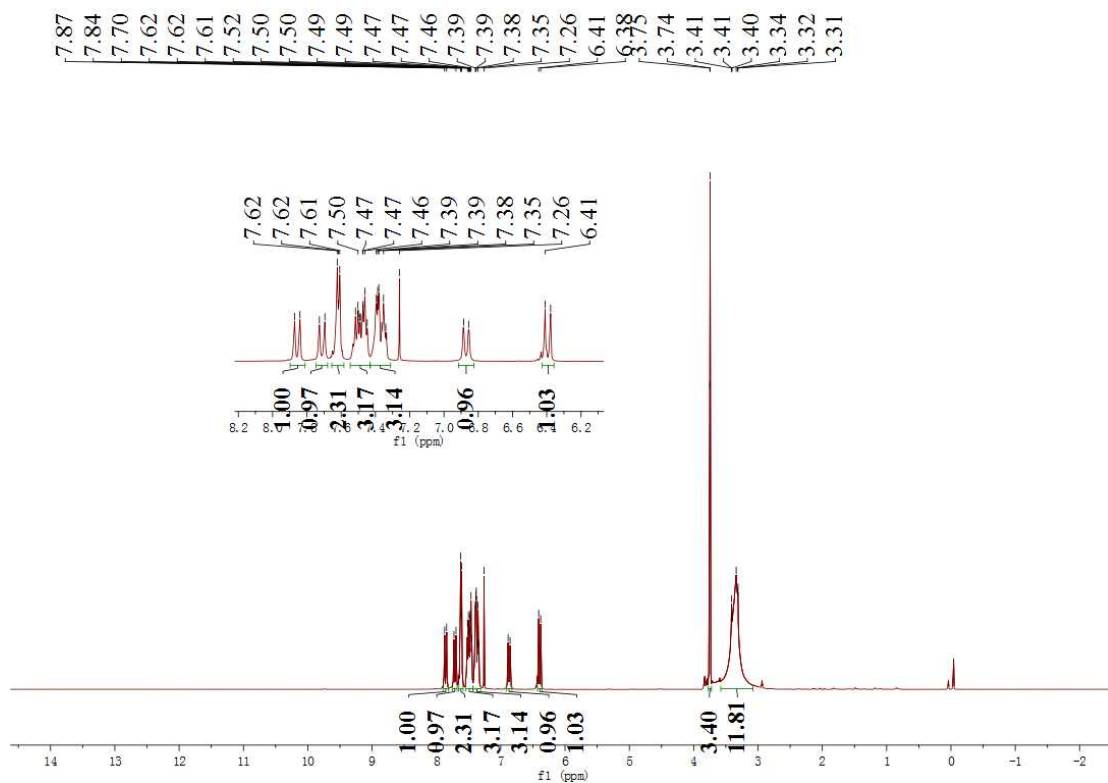

## 7. Diverse derivations of **3**

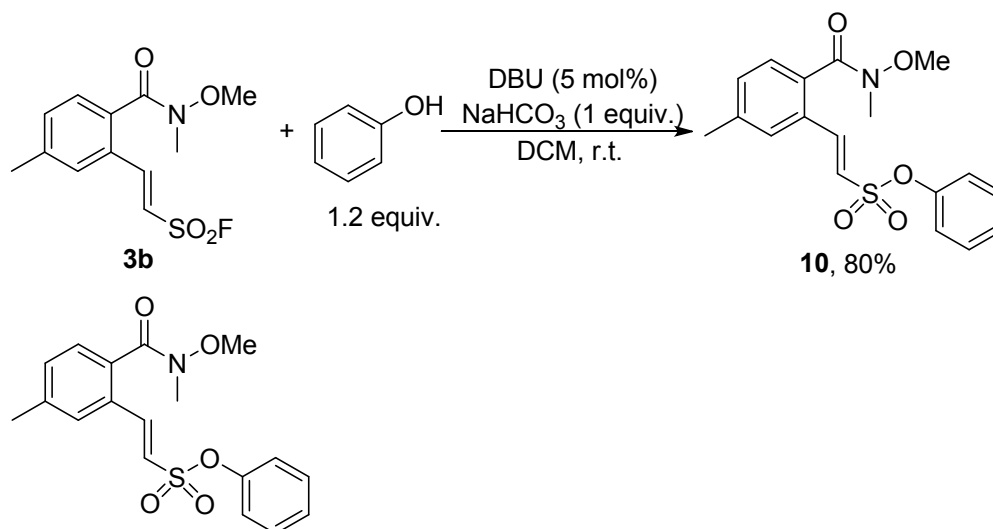

### *(E)*-phenyl 2-(2-(methoxy(methyl)carbamoyl)-5-methylphenyl)ethenesulfonate (**10**)

A mixture of **3b** (0.1 mmol, 1 equiv.), phenol (0.12 mmol, 1.2 equiv.), DBU (5 mol%) and NaHCO<sub>3</sub> (0.1 mmol, 1 equiv.) in dichloromethane (2 mL) was stirred at r.t. for 24 h. Upon completion, the reaction mixture was concentrated in vacuo and purified by column chromatography on silica gel using petroleum ether / ethyl acetate = 2 : 1 (v / v) as the eluent to afford the desired product **10** as a colorless oil (28.9 mg, 80% yield). <sup>1</sup>H NMR (500 MHz, CDCl<sub>3</sub>) δ 7.58 (d, *J* = 15.5 Hz, 1H), 7.38-7.24 (m, 8H), 6.84 (d, *J* = 15.5 Hz, 1H), 3.35 (s, 3H), 3.25 (s, 3H), 2.40 (s, 3H). <sup>13</sup>C NMR (126 MHz, CDCl<sub>3</sub>) δ 169.0 (s), 149.6 (s), 143.6 (s), 140.2 (s), 133.5 (s), 131.8 (s), 129.9 (s), 129.2 (s), 127.8 (s), 127.8 (s), 127.2 (s), 122.7 (s), 122.4 (s), 61.2 (s), 32.6 (s),

21.3 (s). HRMS ESI (m/z):  $[M+Na]^+$  calcd for  $C_{18}H_{19}NNaO_5S$ : 384.0879, found: 384.0883.

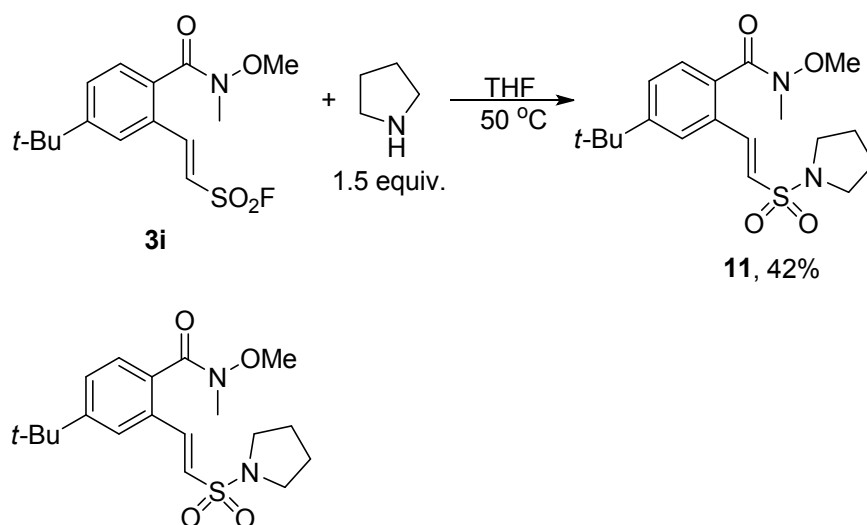

(*E*)-4-(tert-butyl)-*N*-methoxy-*N*-methyl-2-(2-(pyrrolidin-1-ylsulfonyl)vinyl)benzamide (**11**).

A mixture of **3i** (0.2 mmol, 1 equiv.) and tetrahydro pyrrole (0.3 mmol, 1.5 equiv.) in THF (2 mL) was stirred at 50 °C for 6 hours. Upon completion, the reaction mixture was concentrated in vacuo and purified by column chromatography on silica gel using petroleum ether / ethyl acetate = 1 : 1 (v / v) as the eluent to afford the desired product **11** as a colorless oil (32.0 mg, 42% yield).  $^1H$  NMR (500 MHz,  $CDCl_3$ )  $\delta$  7.55-7.52 (m, 2H), 7.46 (dd,  $J$  = 8.1, 1.8 Hz, 1H), 7.35 (d,  $J$  = 8.1 Hz, 1H), 6.69 (d,  $J$  = 15.5 Hz, 1H), 3.49 (s, 3H), 3.37-3.27 (m, 7H), 1.90-1.88 (m, 4H), 1.33 (s, 9H).  $^{13}C$  NMR (126 MHz,  $CDCl_3$ )  $\delta$  169.3 (s), 153.2 (s), 140.6 (s), 132.9 (s), 130.2 (s), 127.4 (s), 127.4 (s), 124.1 (s), 123.1 (s), 61.3 (s), 47.9 (s), 34.9 (s), 32.9 (s), 31.1 (s), 25.7 (s). HRMS ESI (m/z):  $[M+Na]^+$  calcd for  $C_{19}H_{28}N_2NaO_4S$ : 403.1668, found: 403.1663.

## 8. NMR spectra of 3, 5, 7, 10 and 11

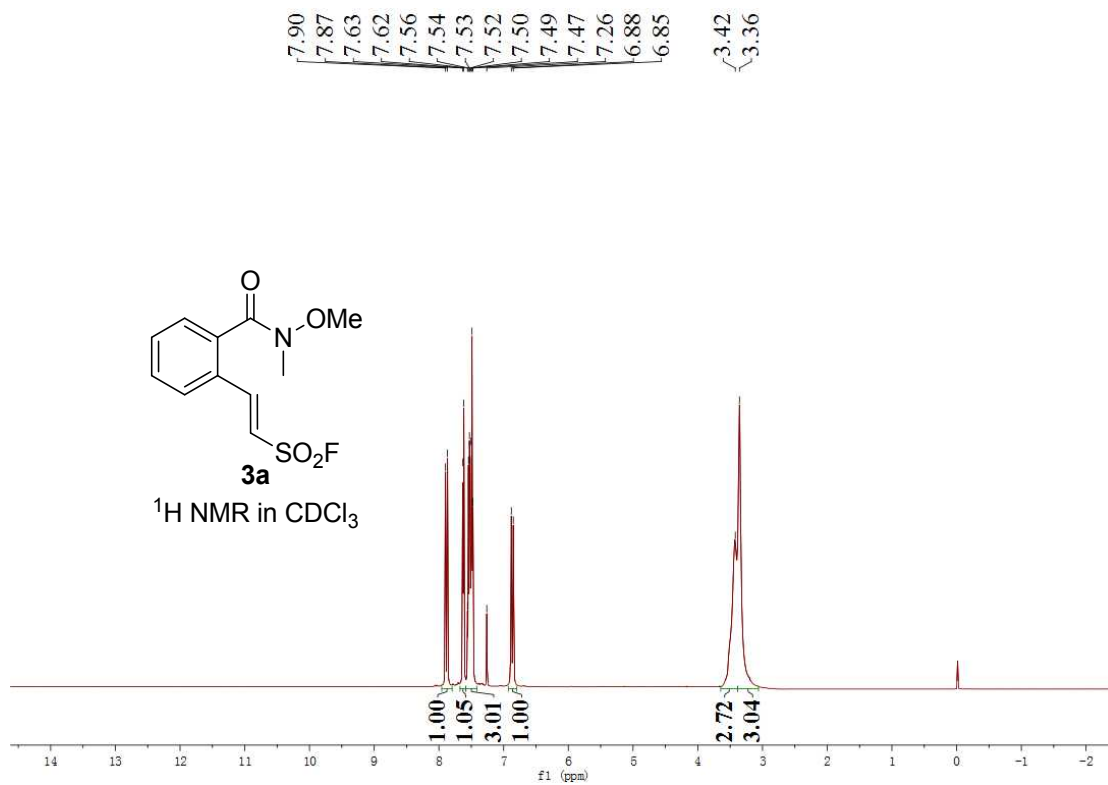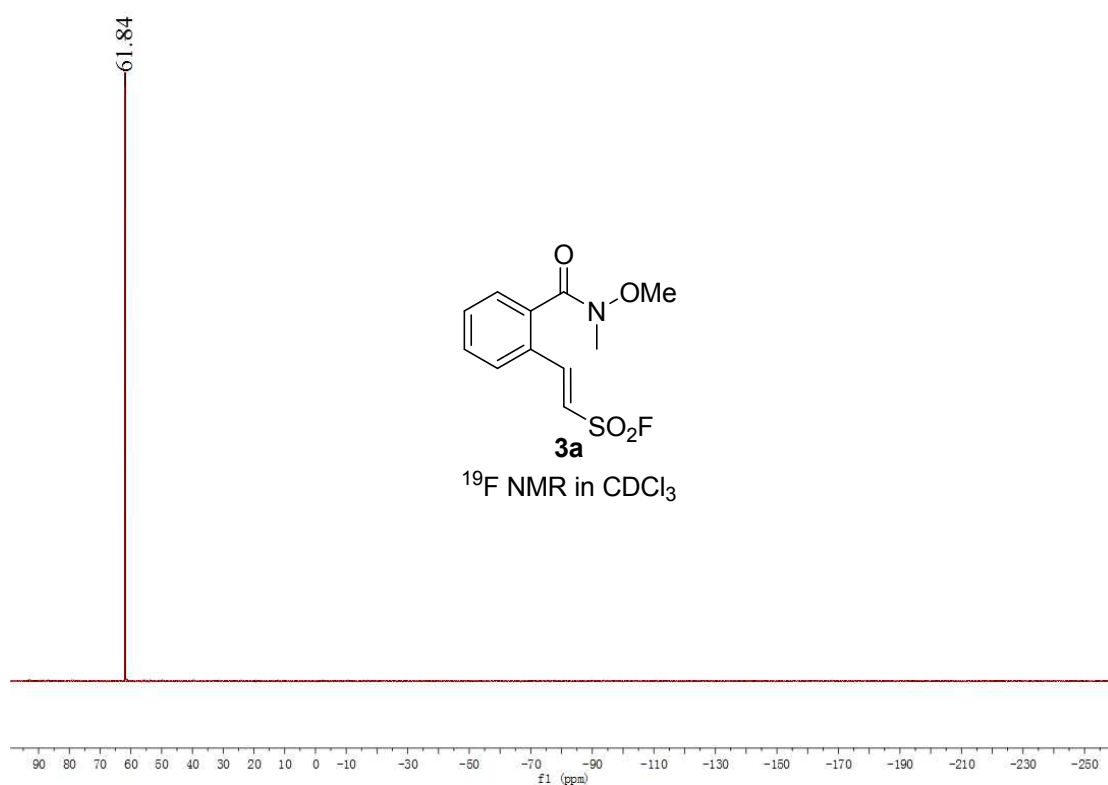



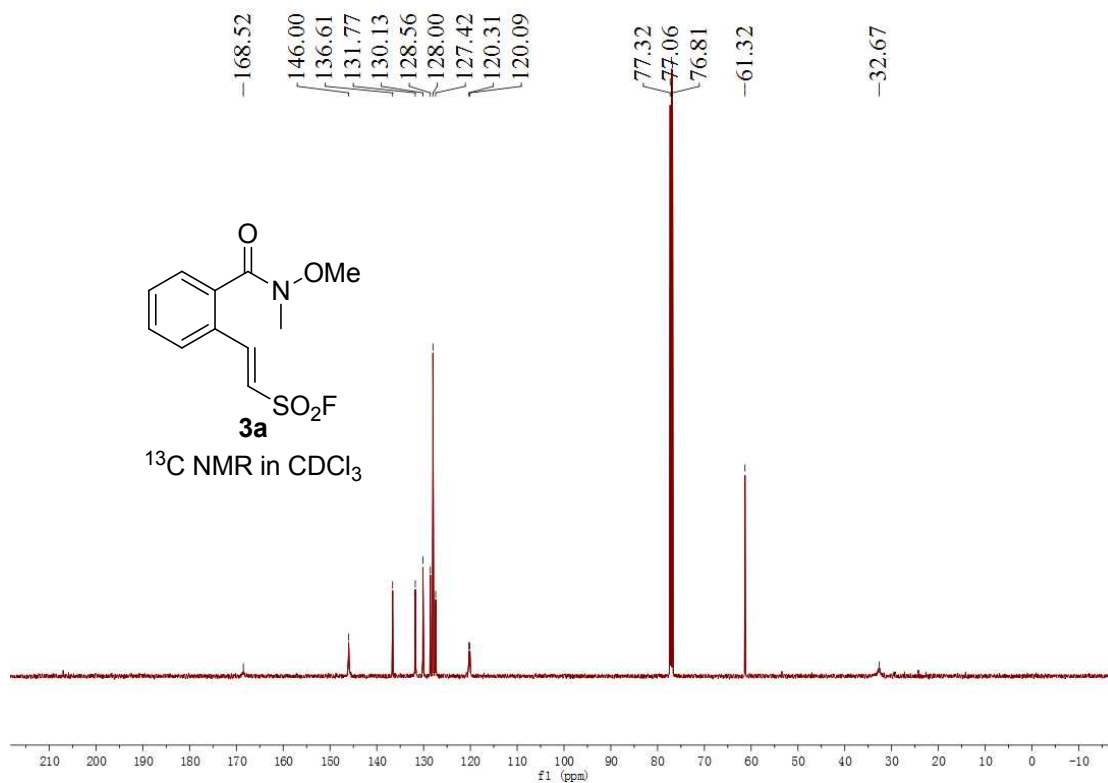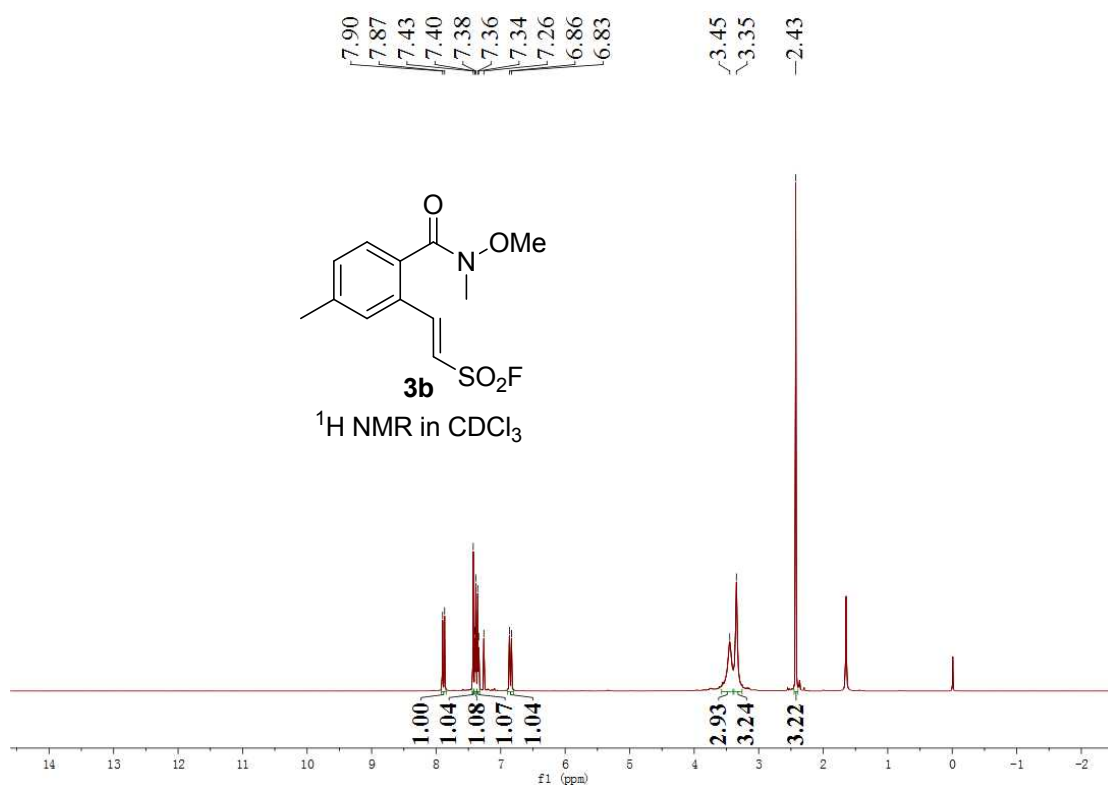

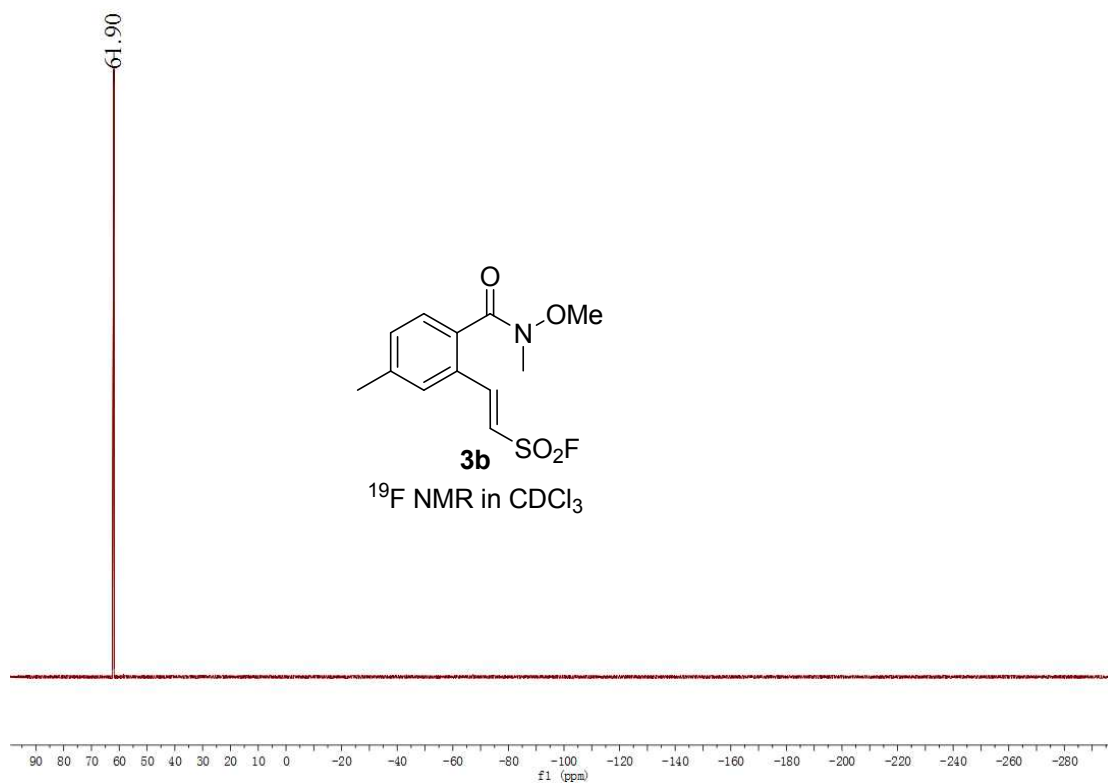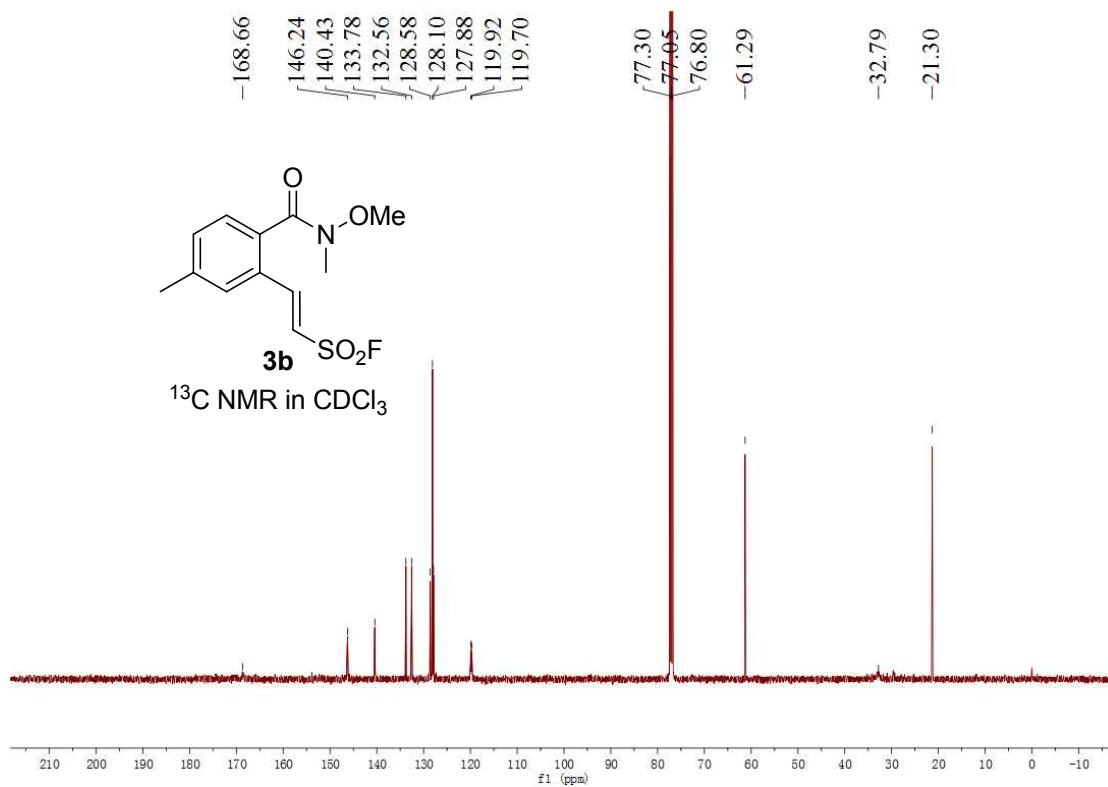

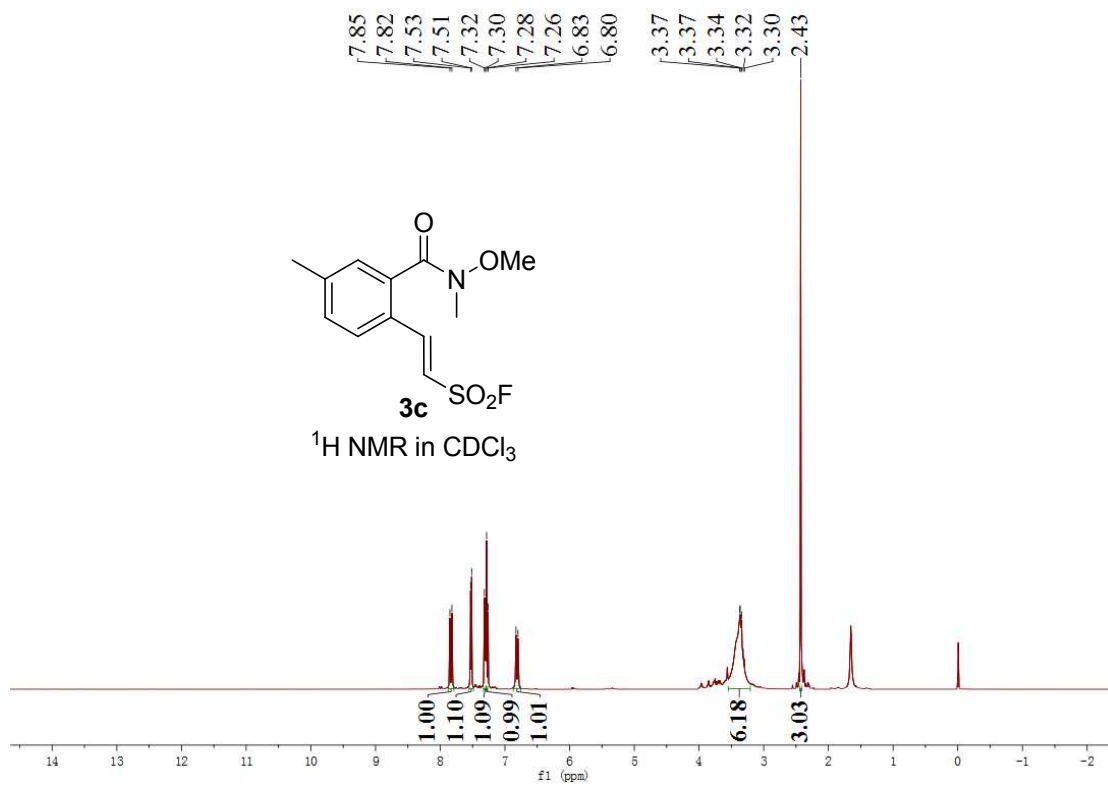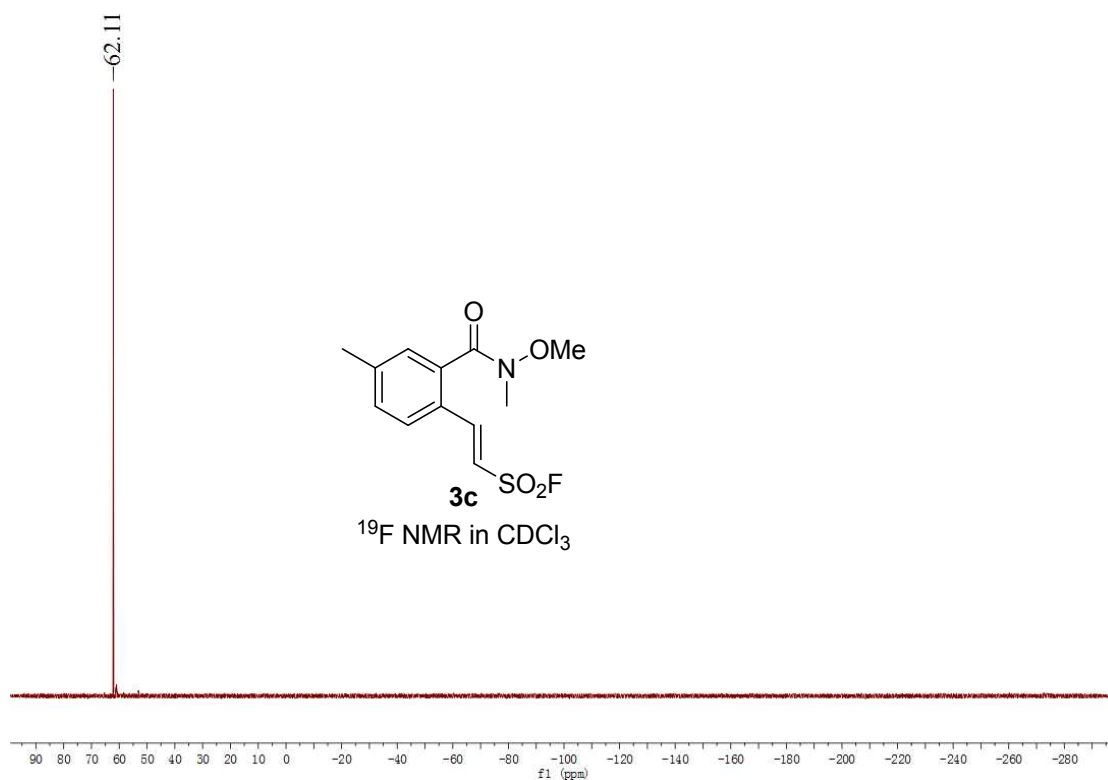

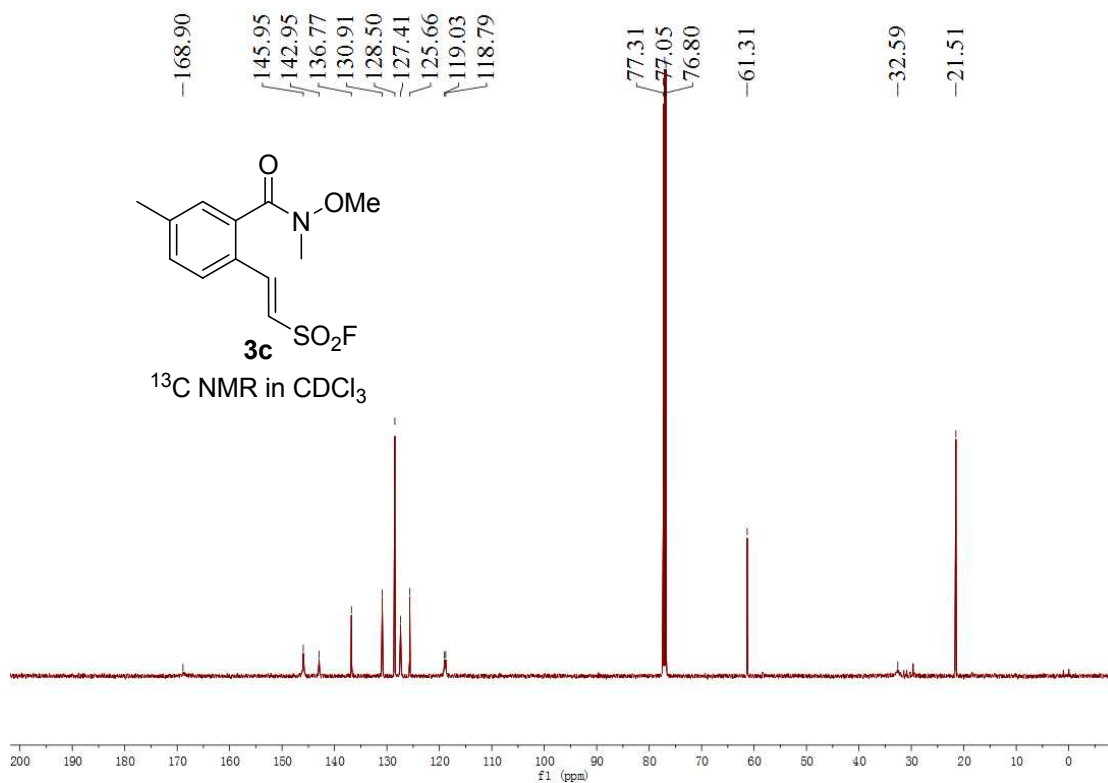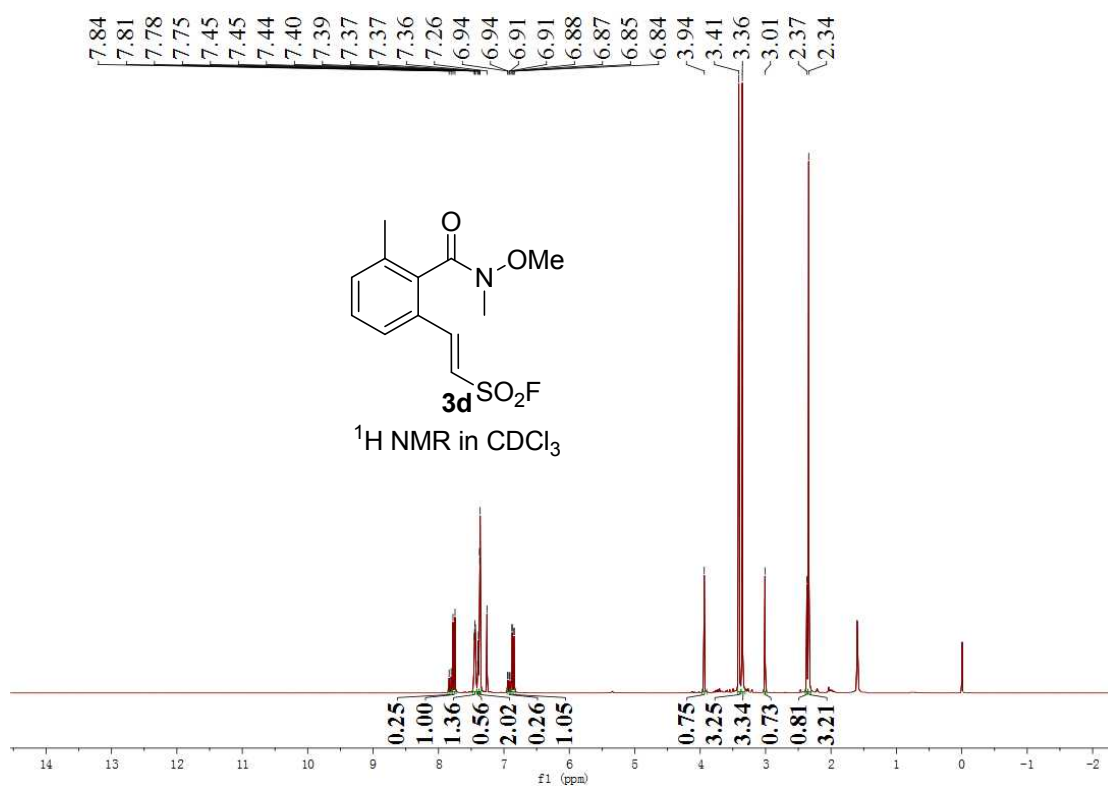

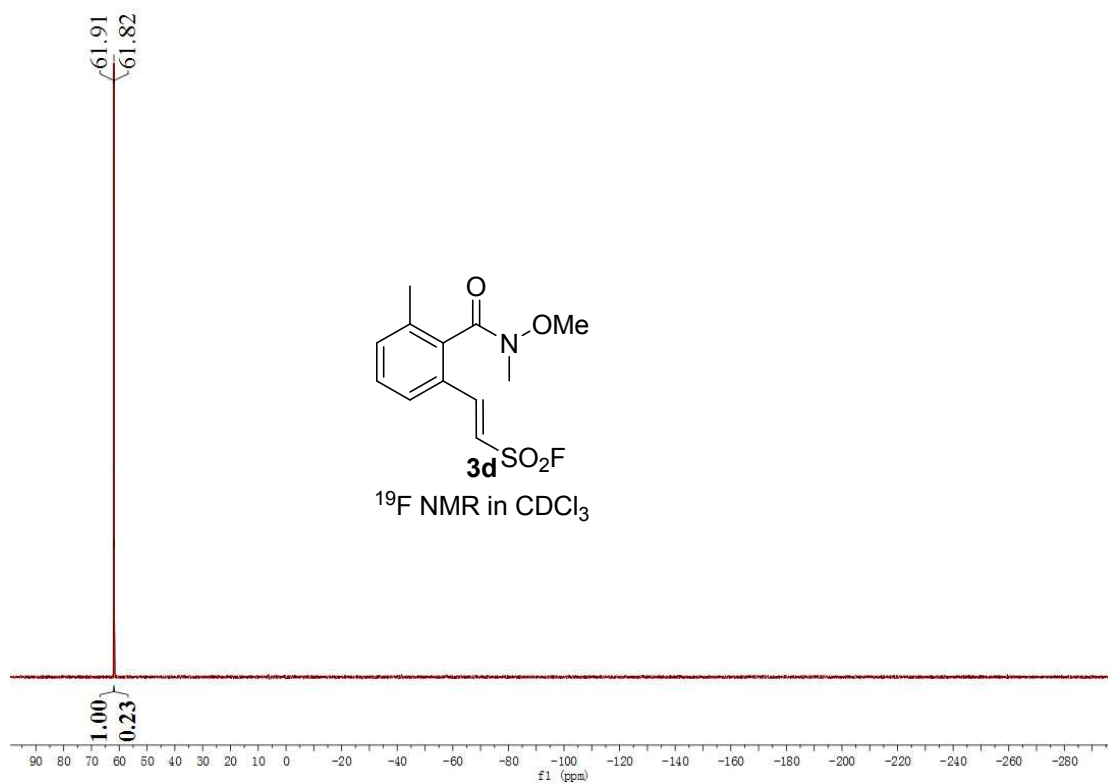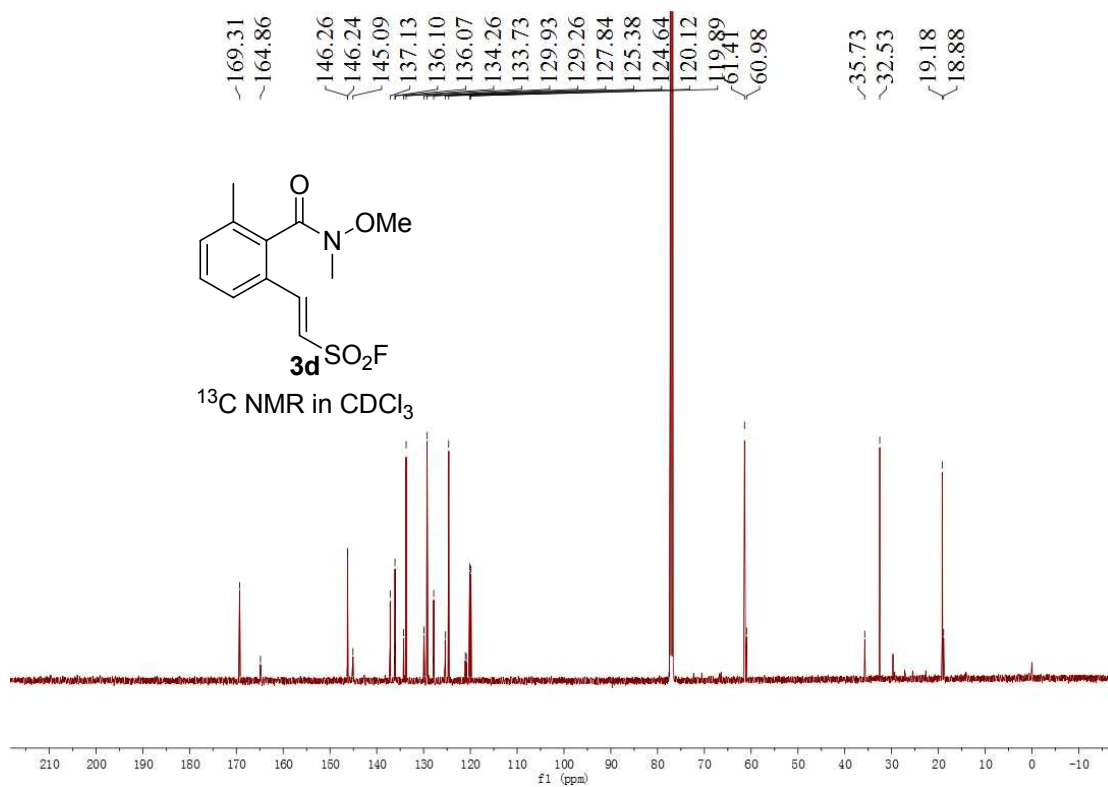

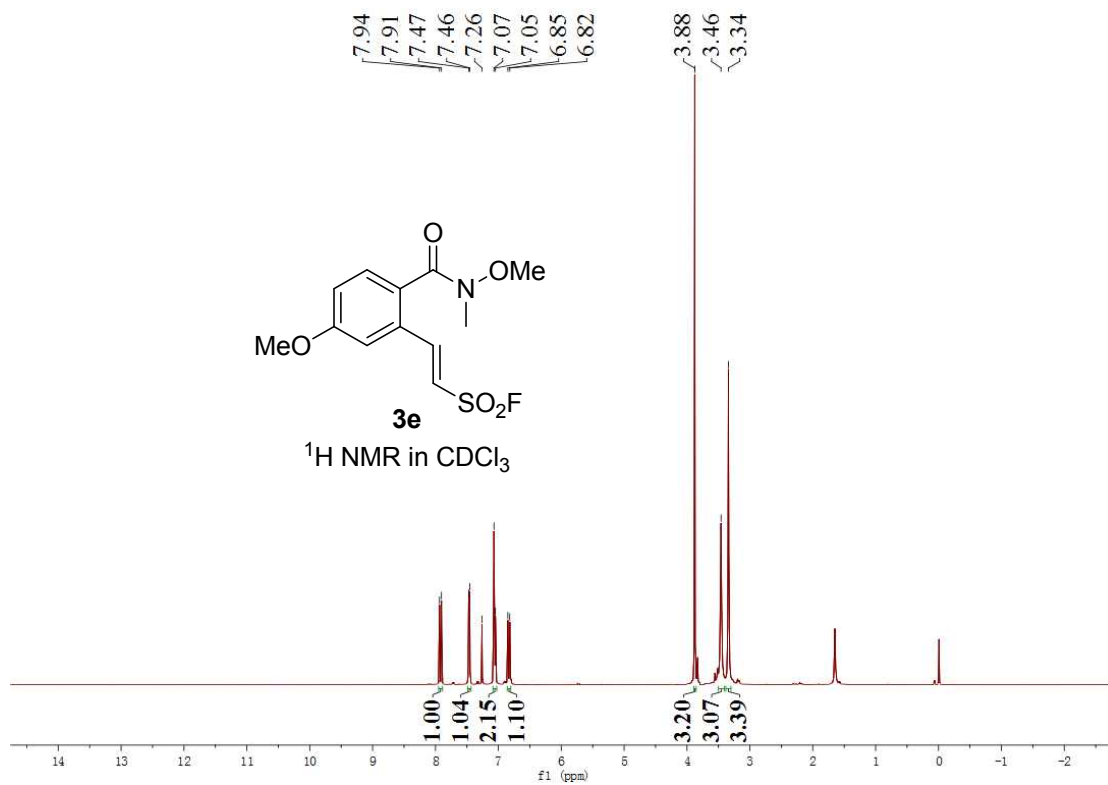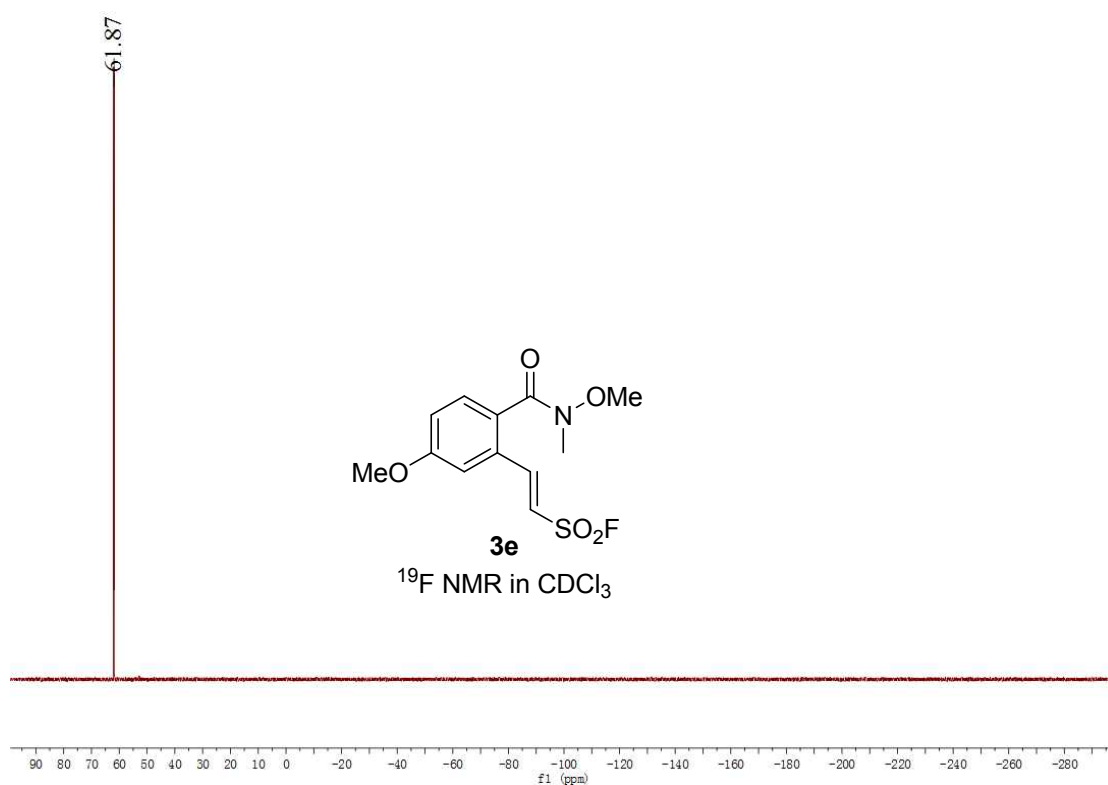

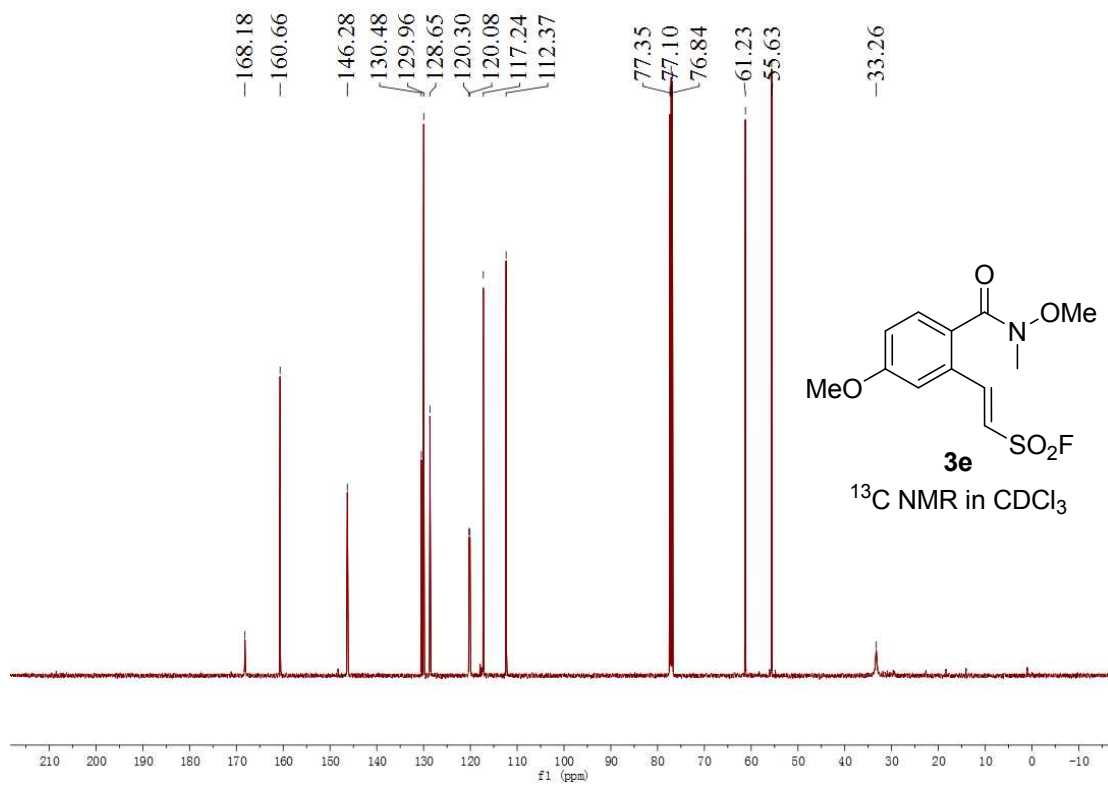

7.81  
 7.78  
 7.73  
 7.70  
 7.46  
 7.44  
 7.42  
 7.40  
 7.26  
 7.20  
 7.19  
 7.08  
 7.07  
 6.96  
 6.93  
 6.89  
 6.89  
 6.86  
 6.86  
 3.89  
 3.86  
 3.41  
 3.39  
 3.05

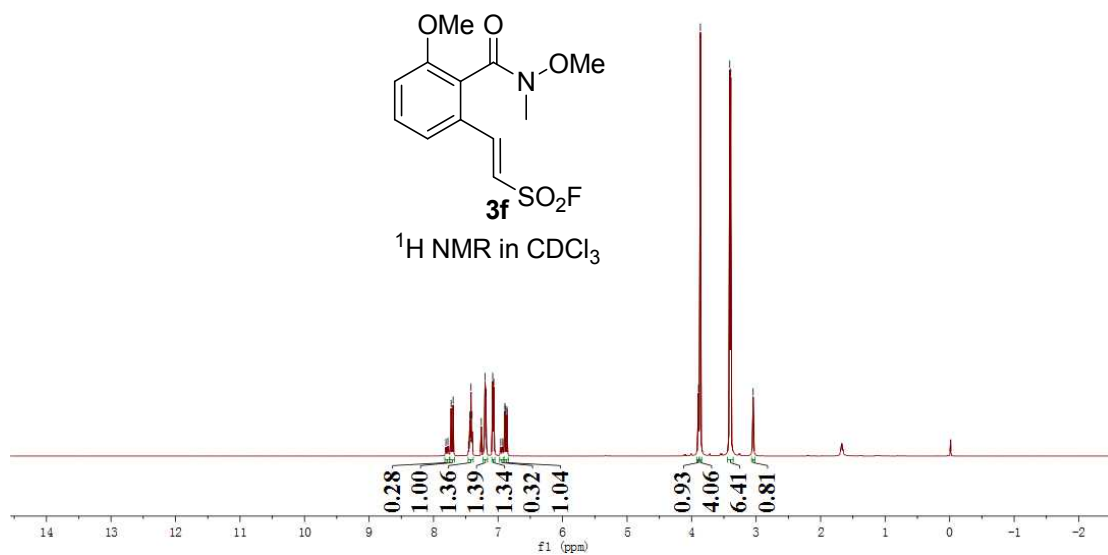

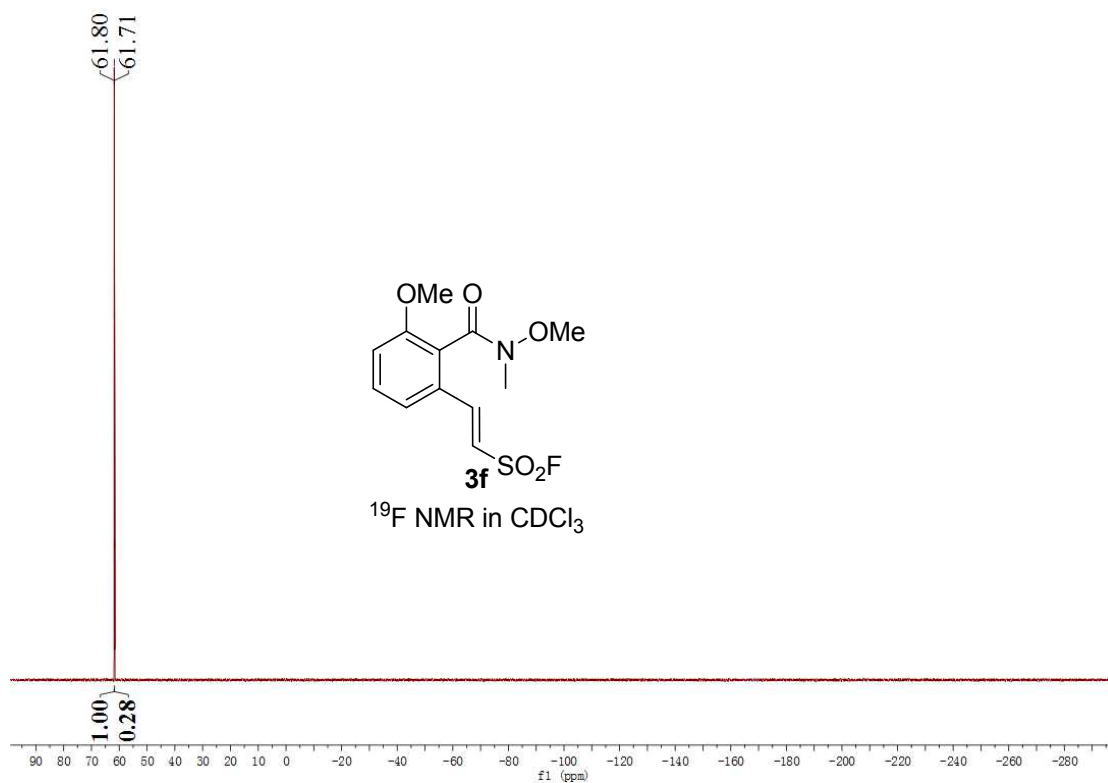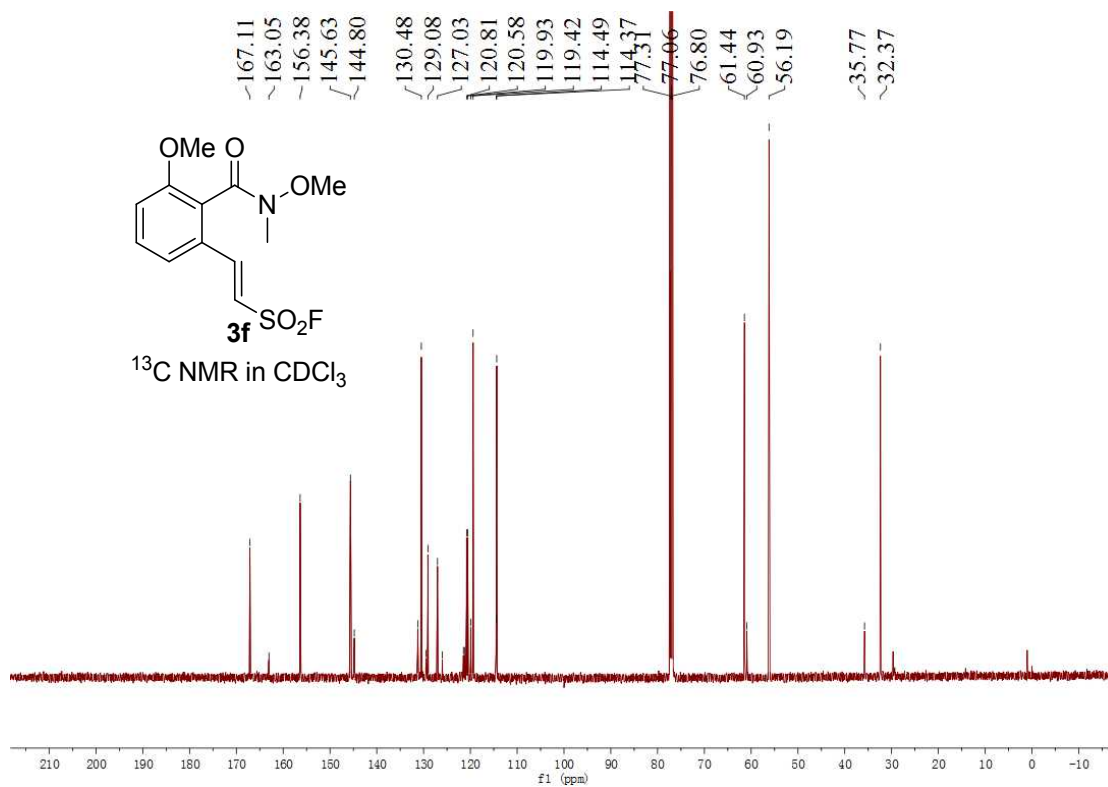



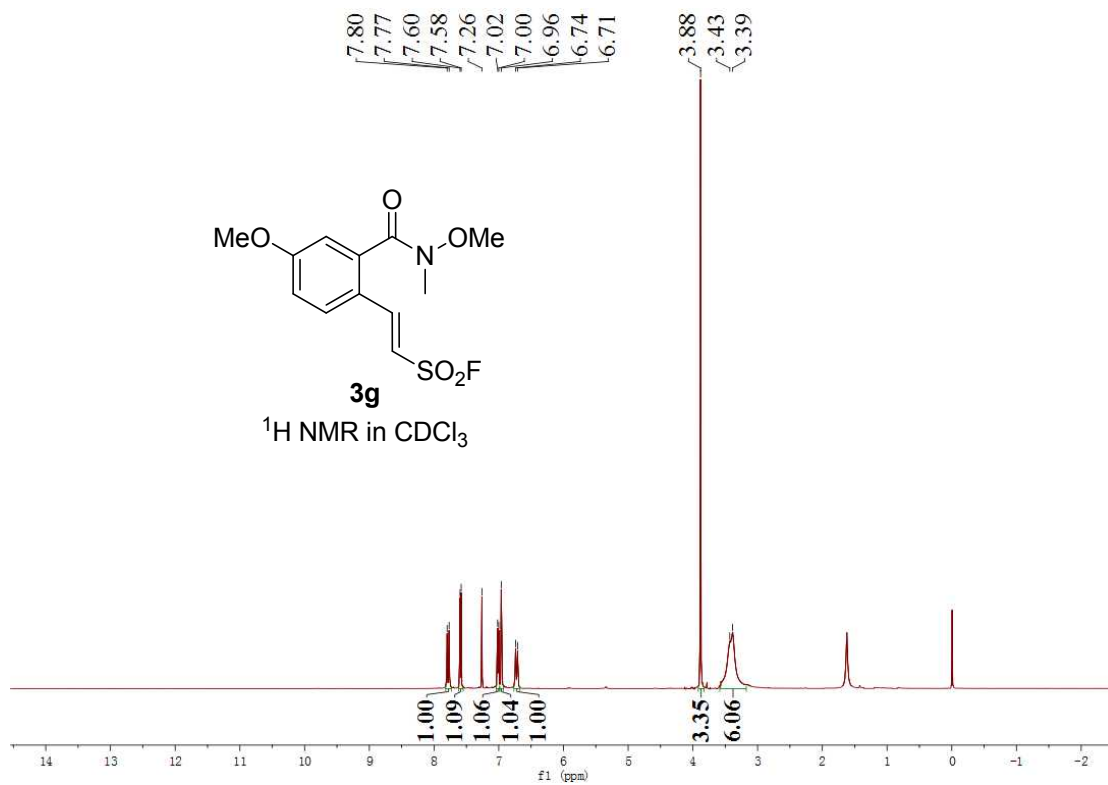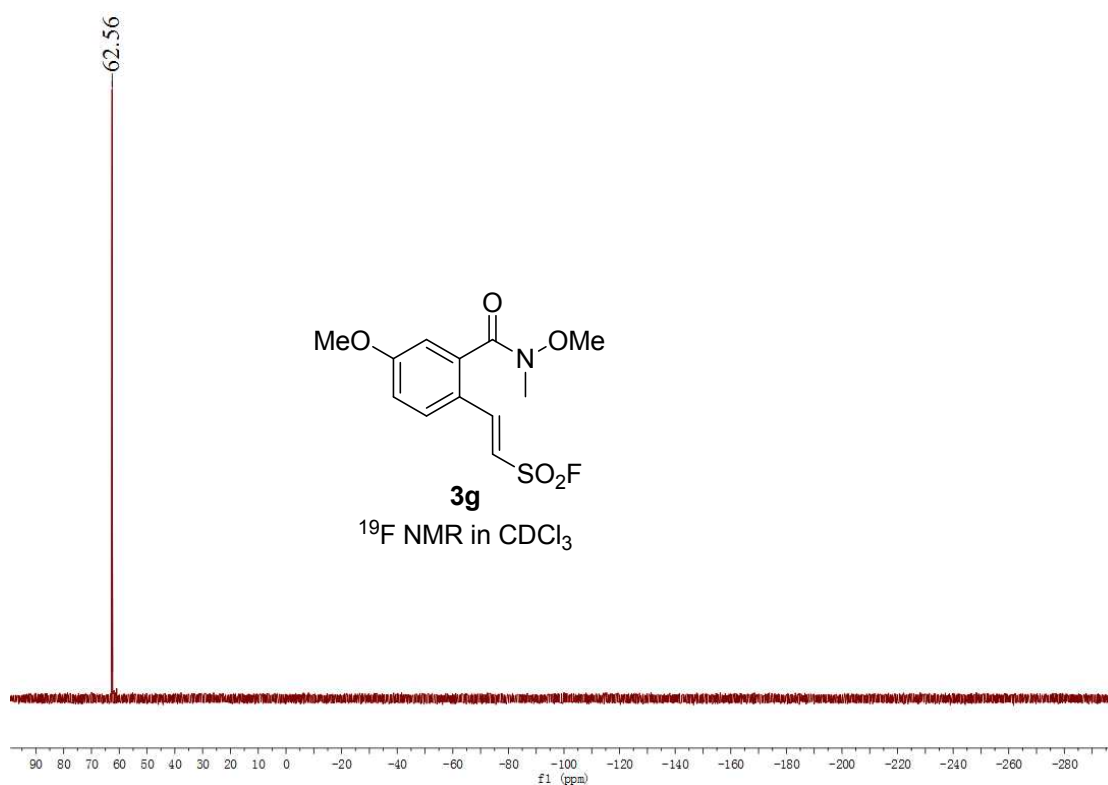

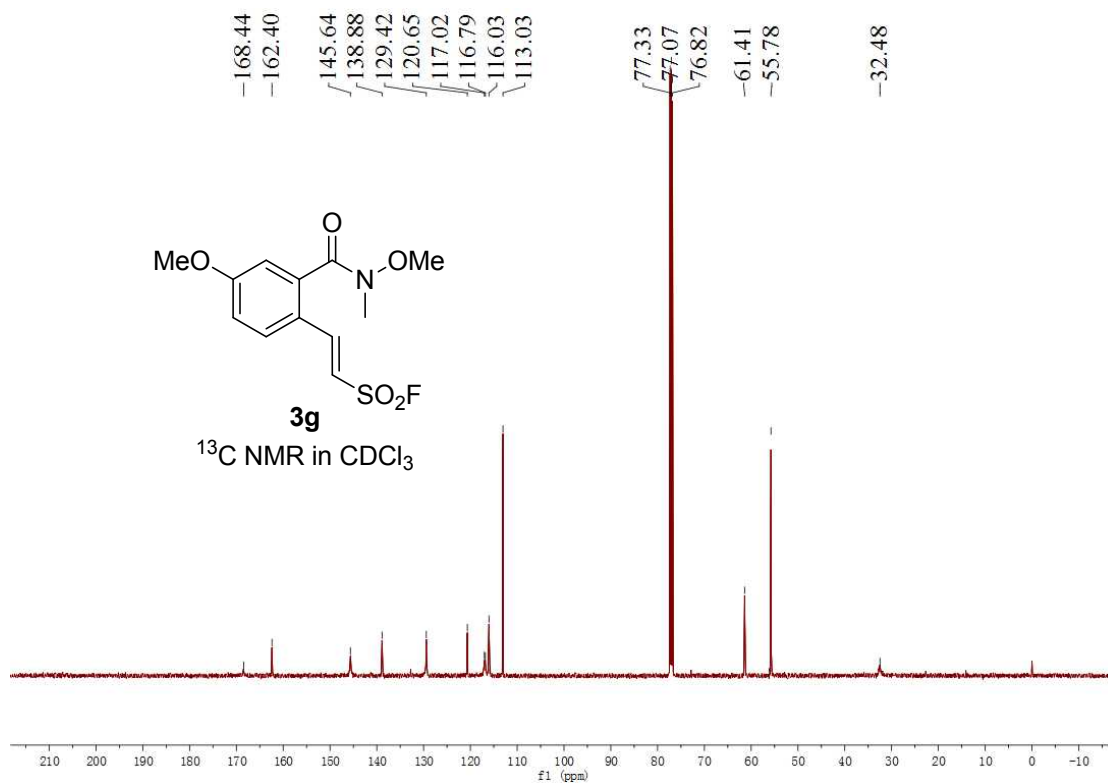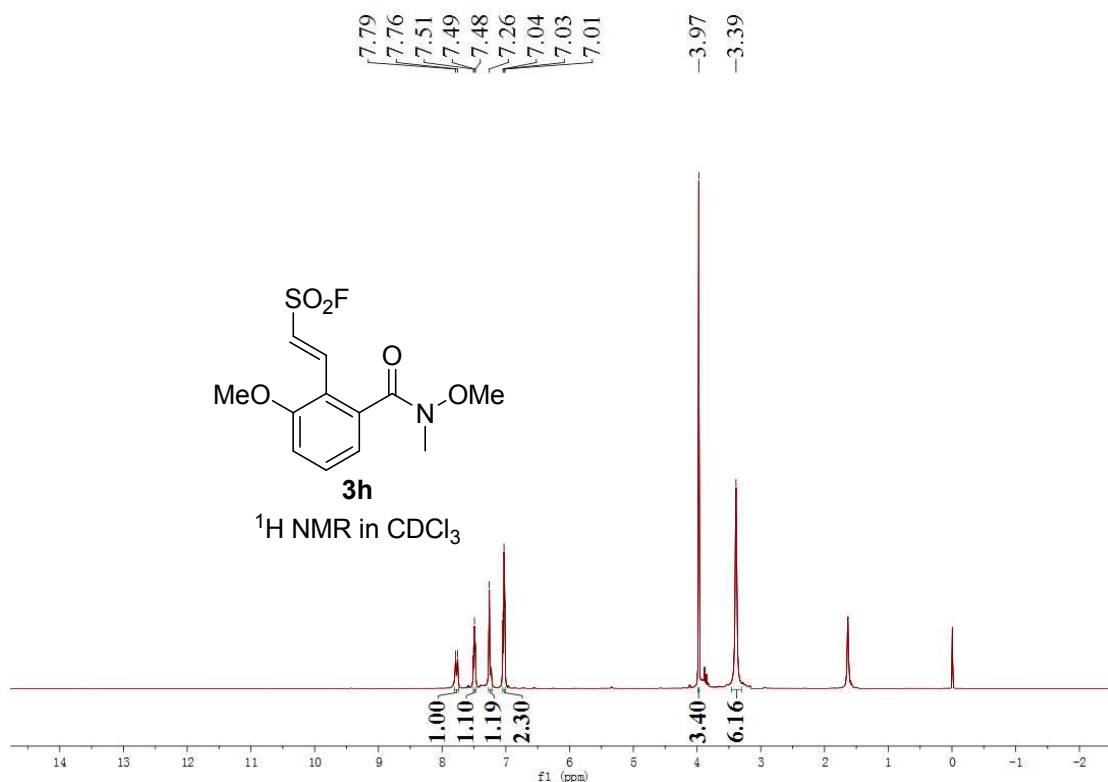

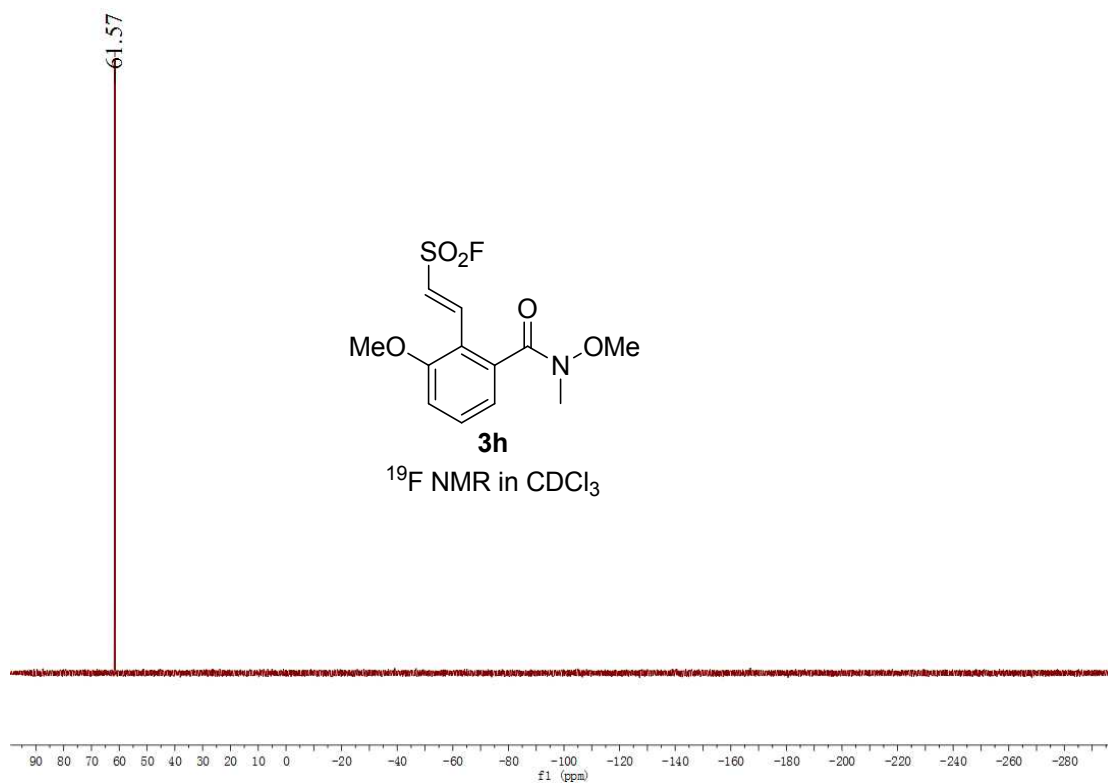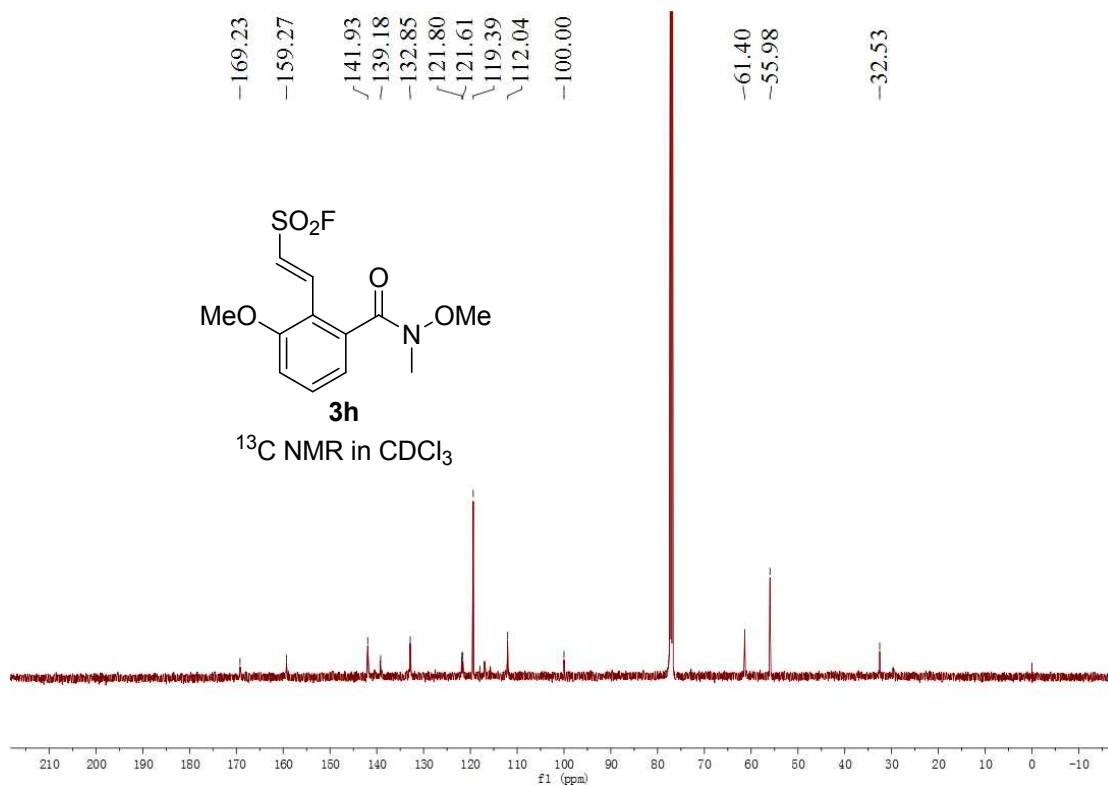

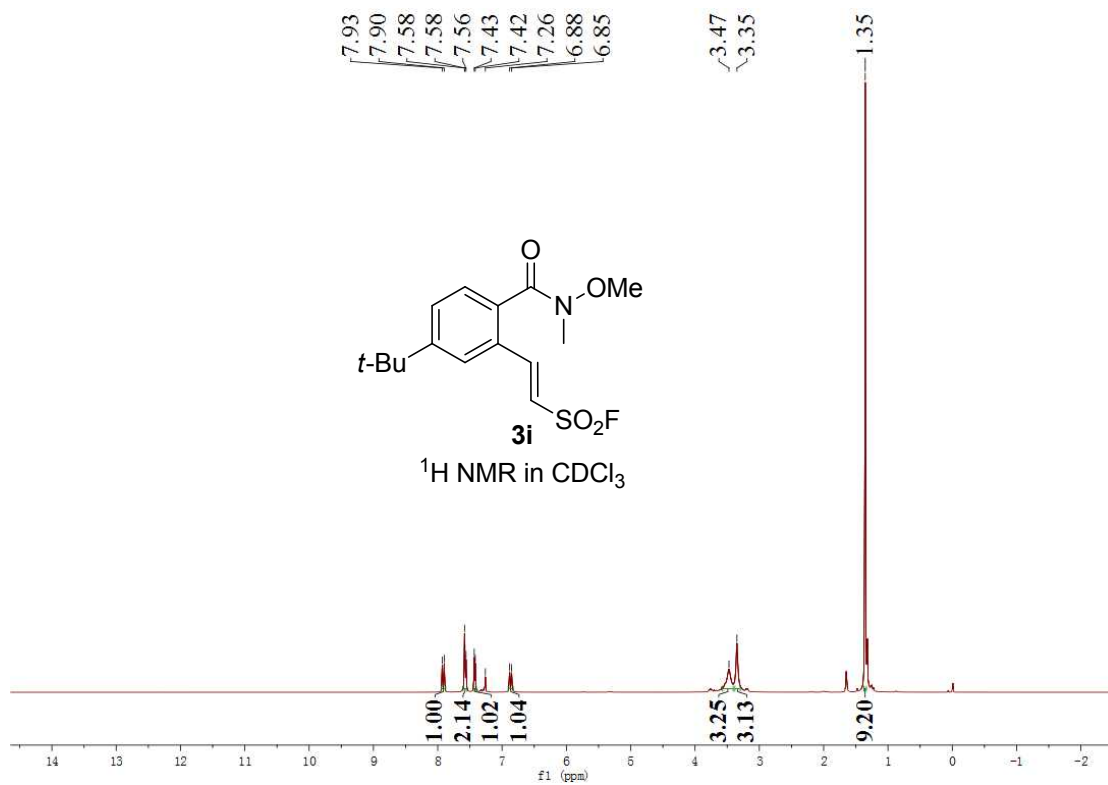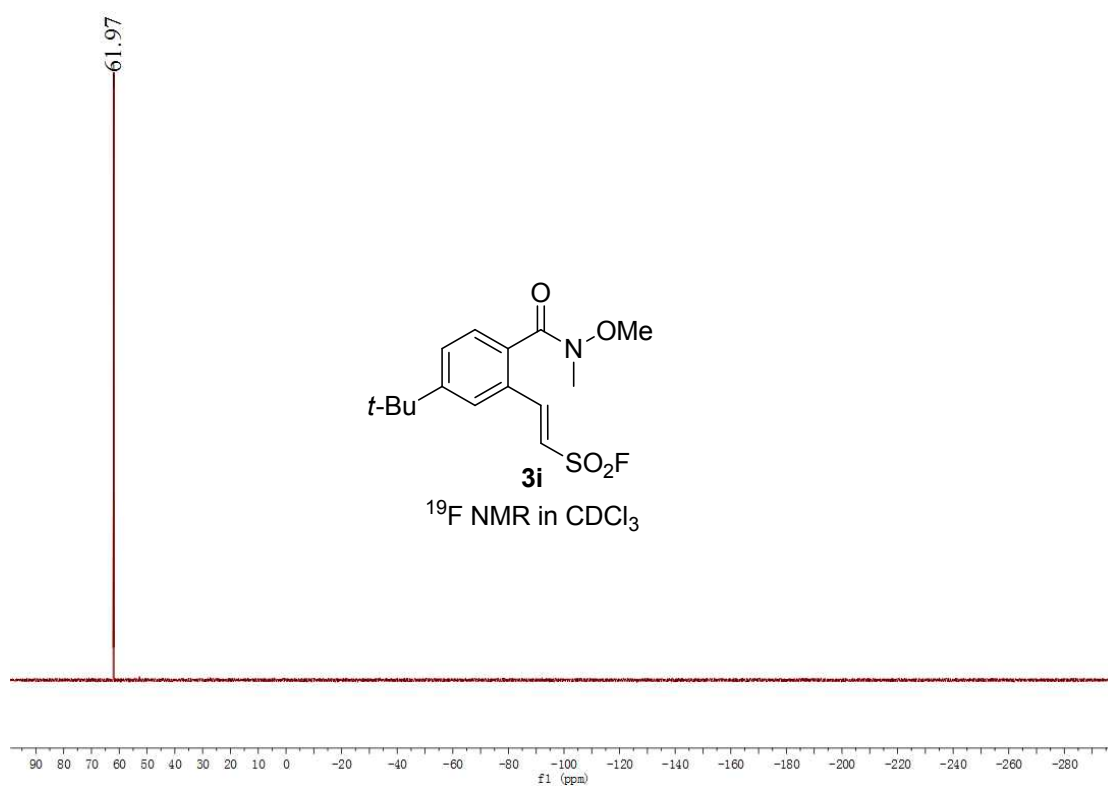

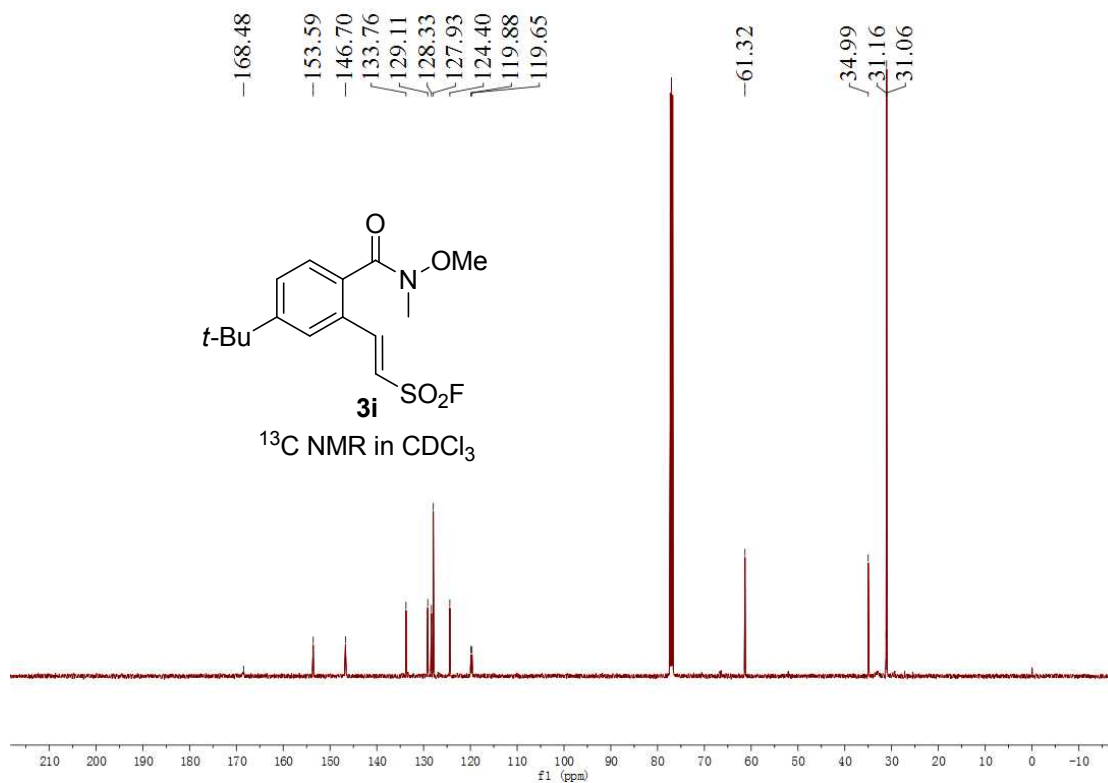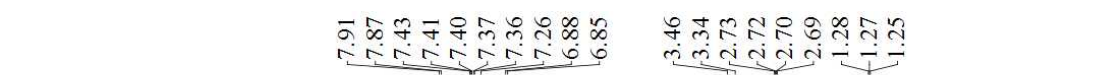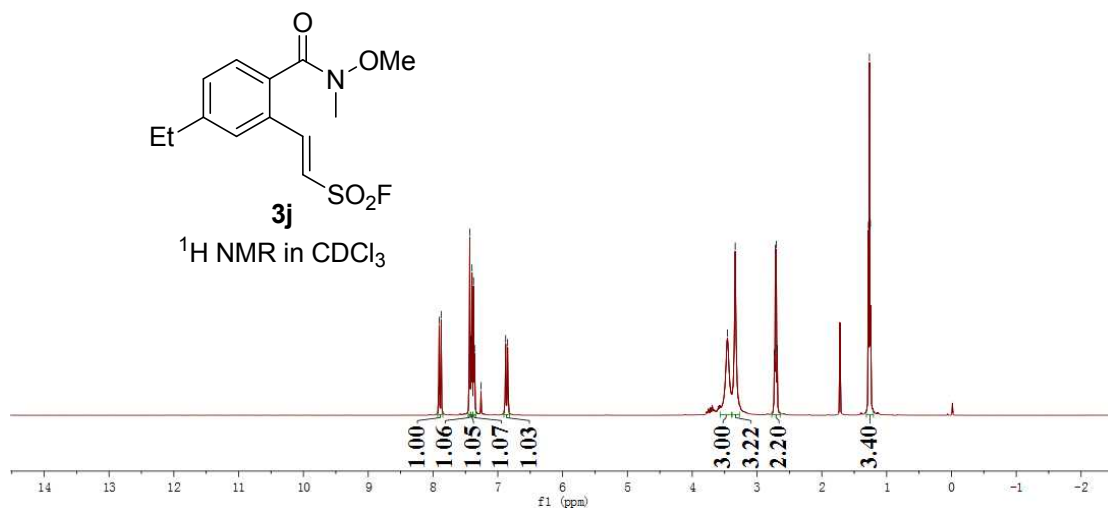

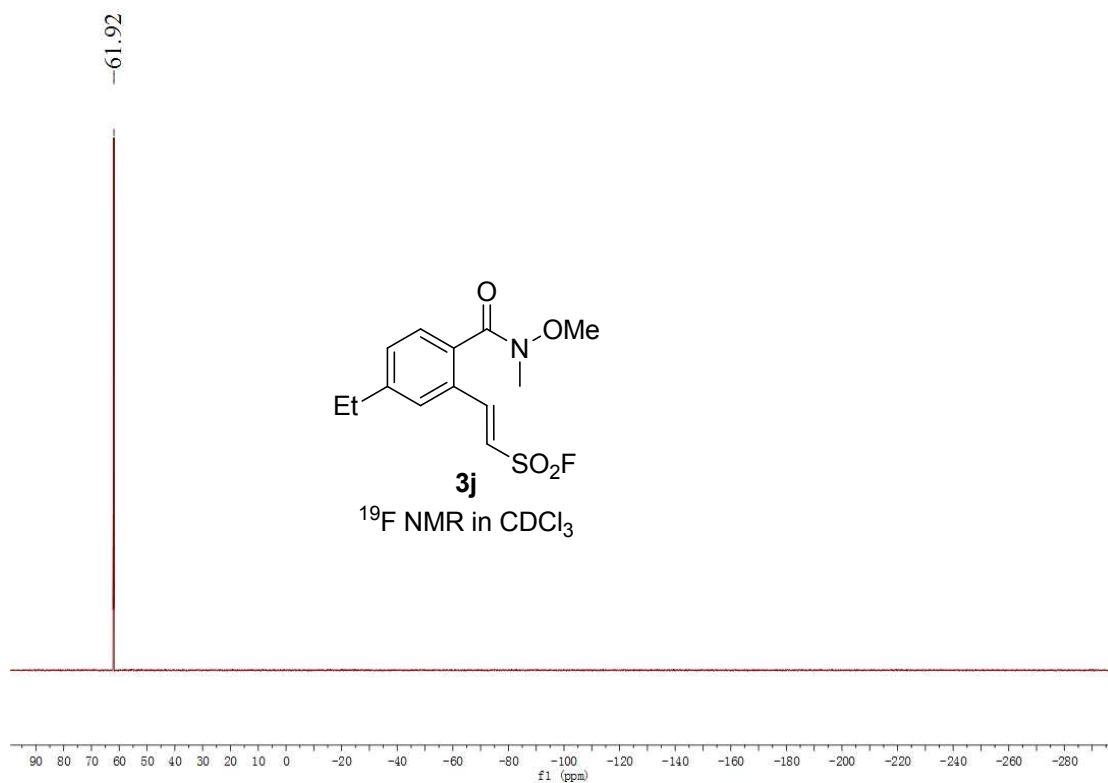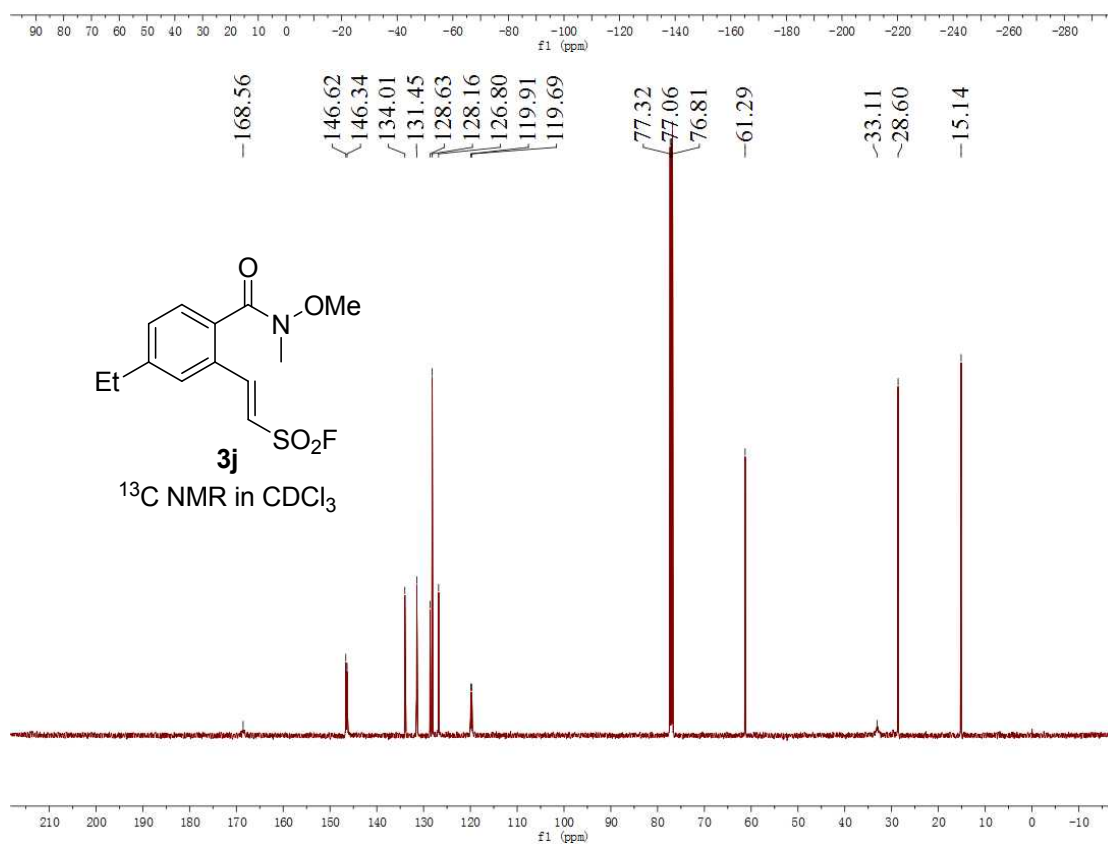

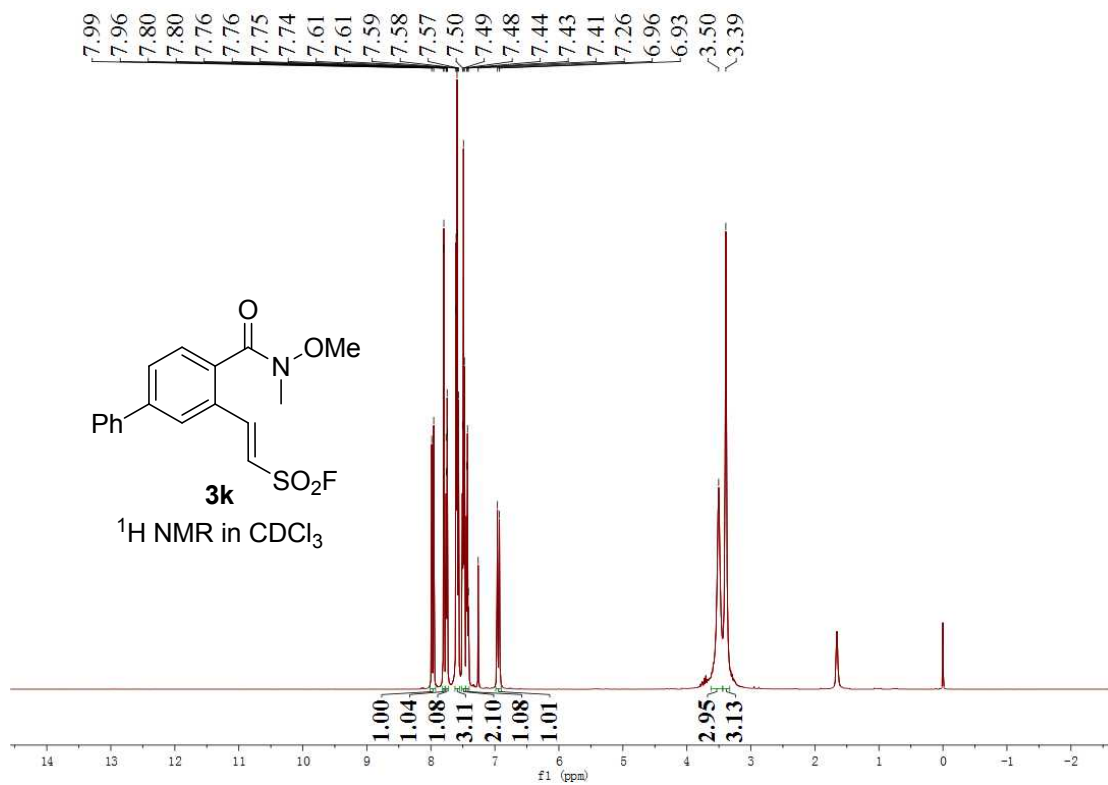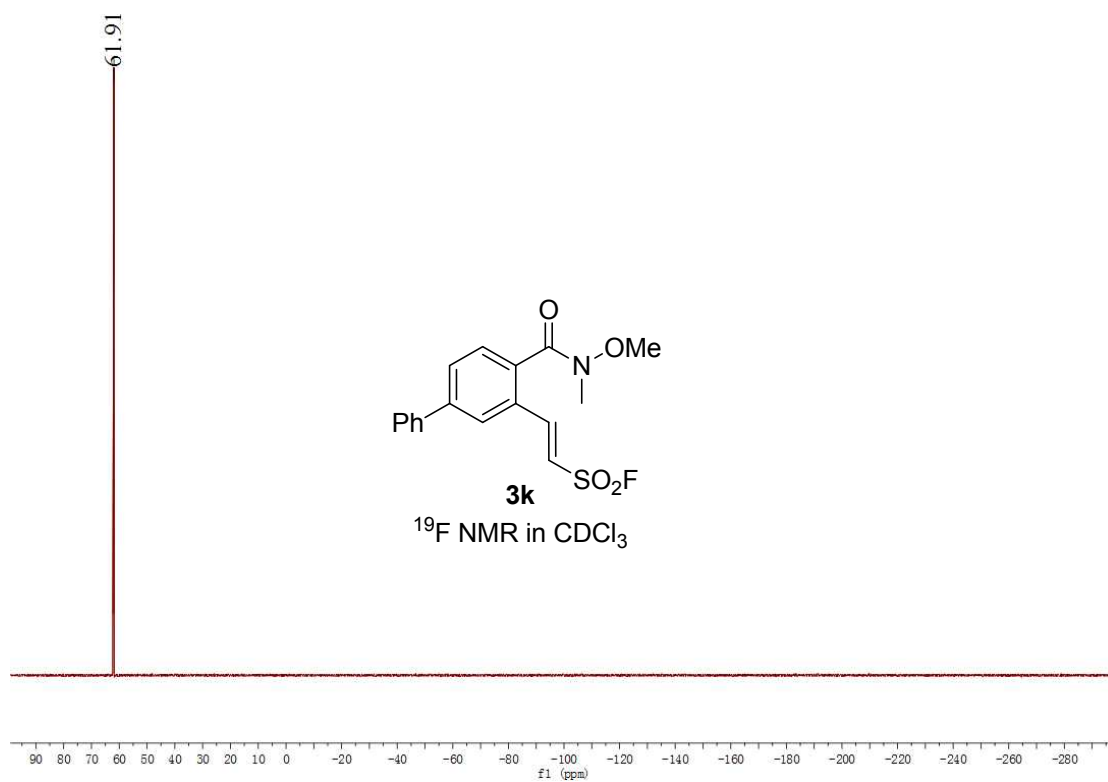

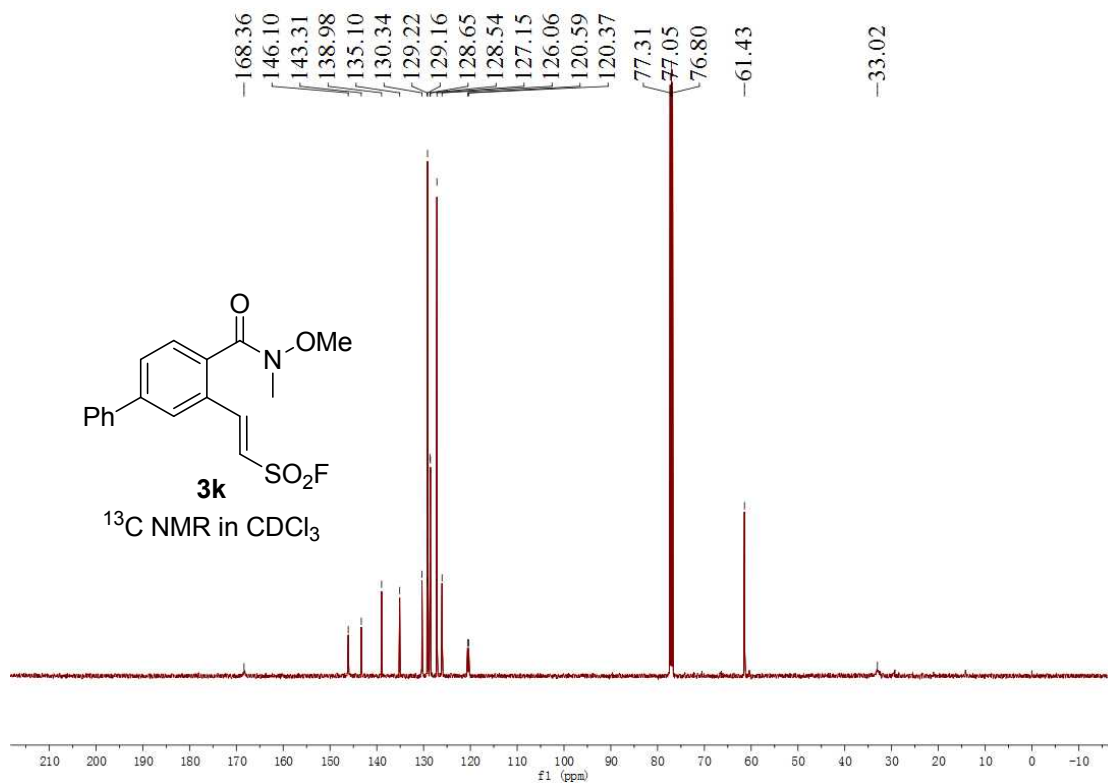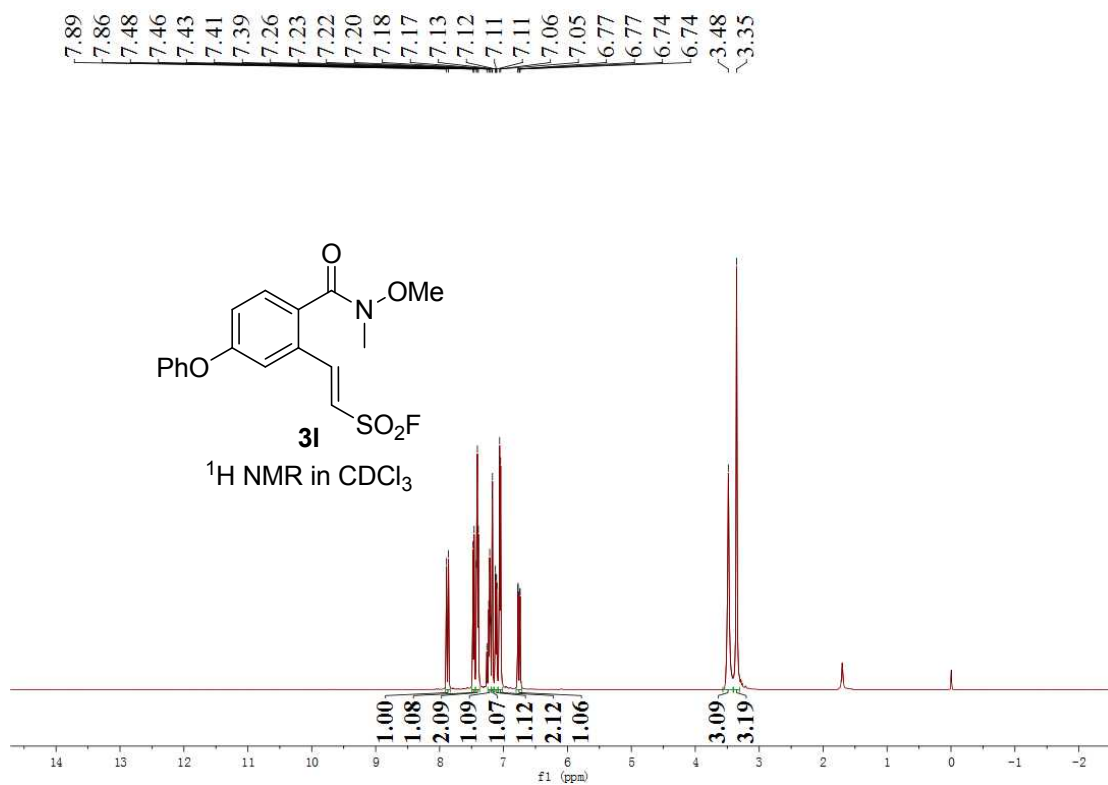



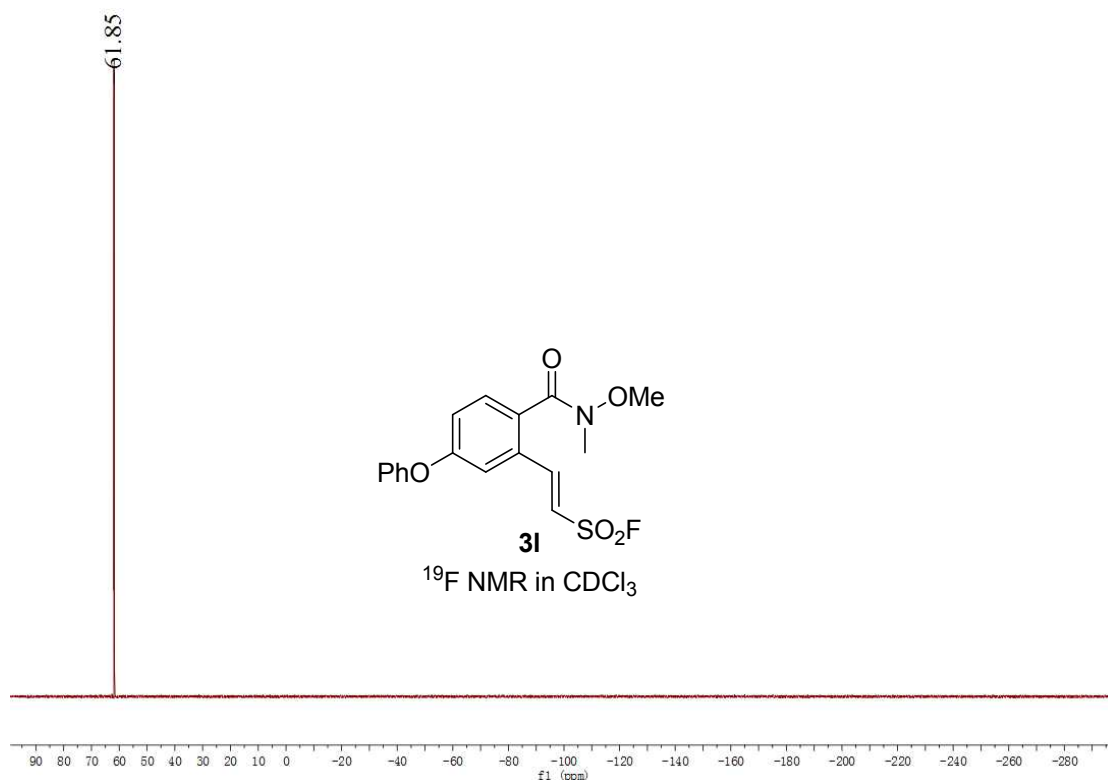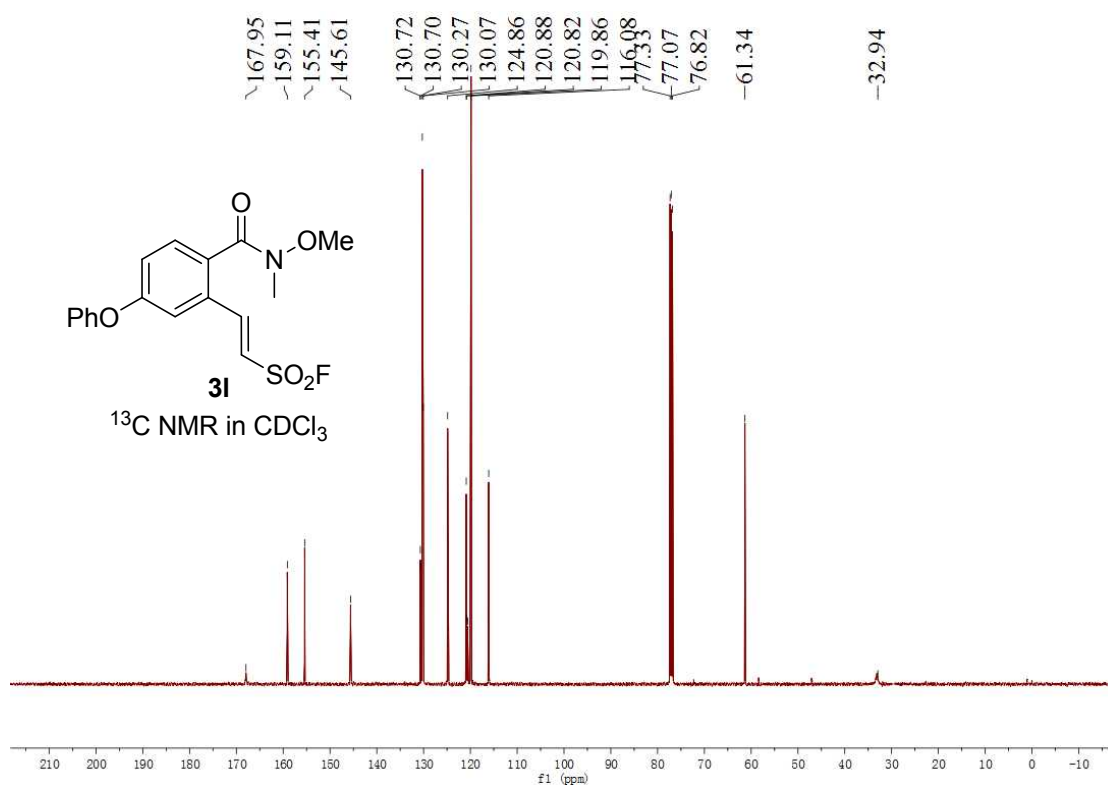

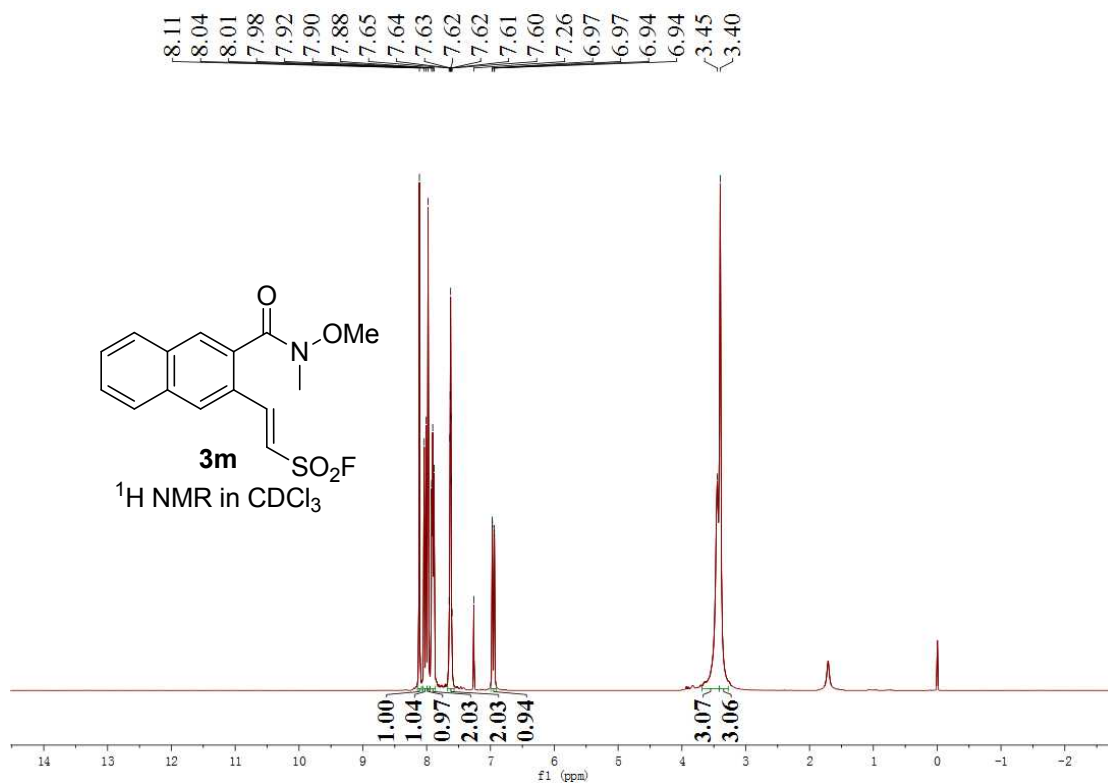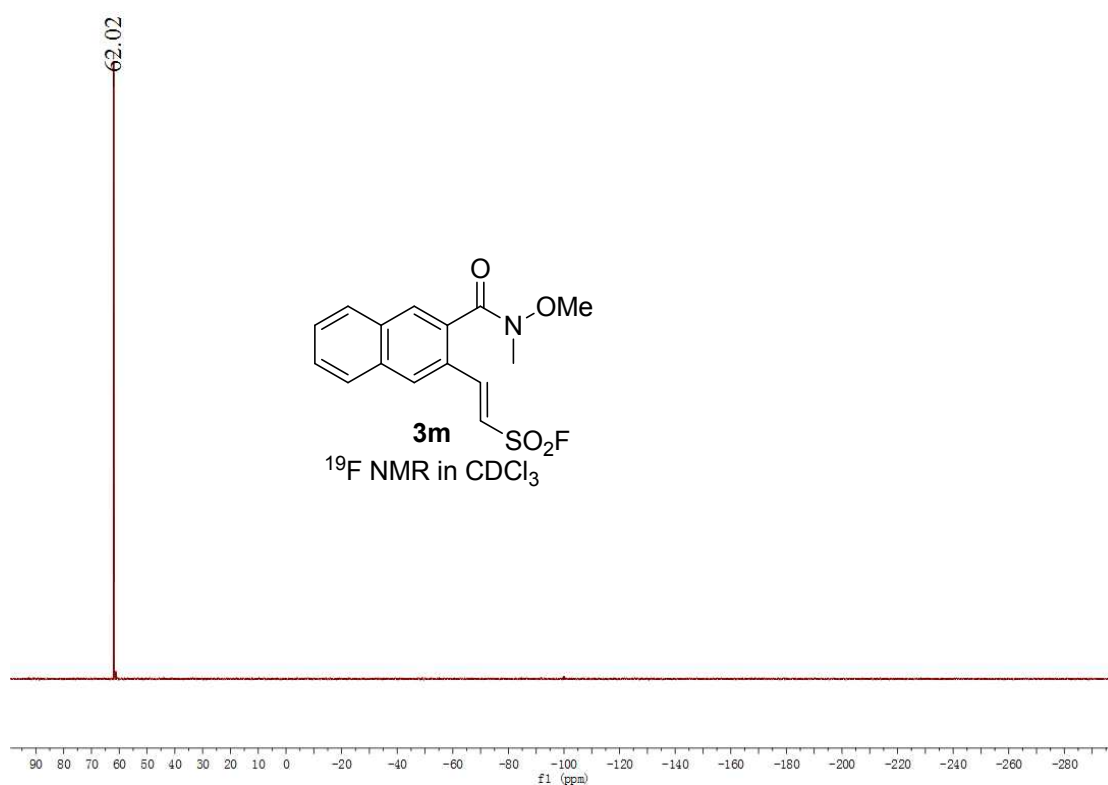

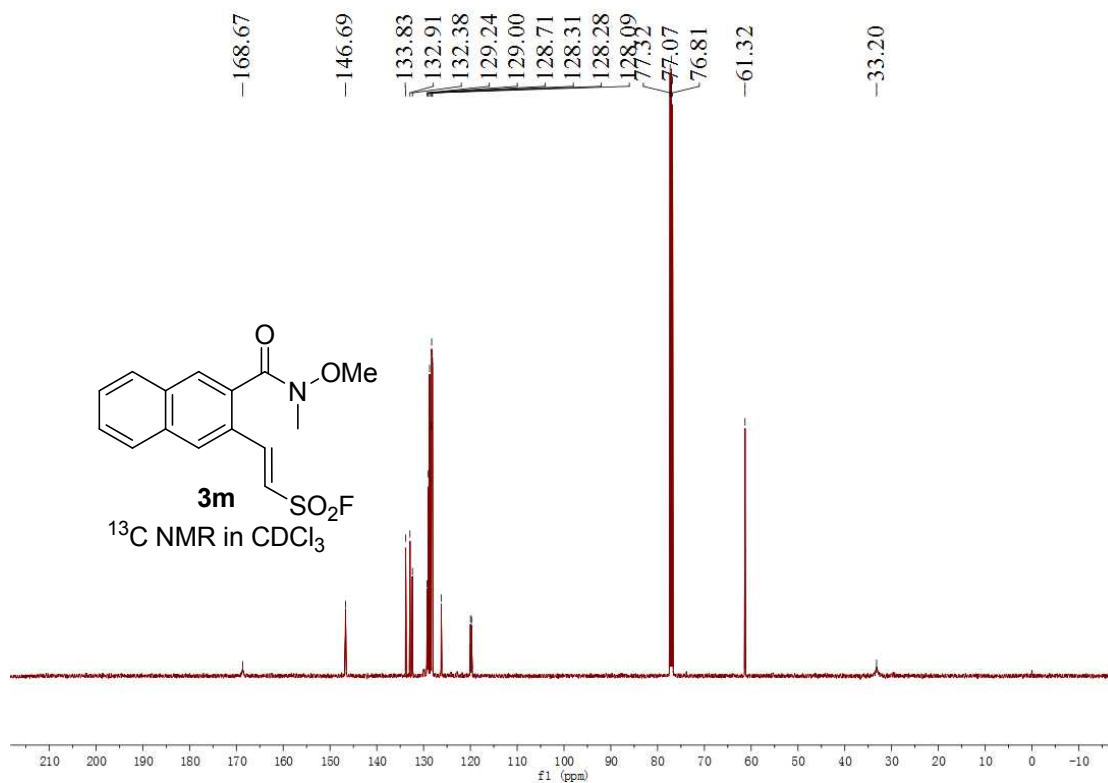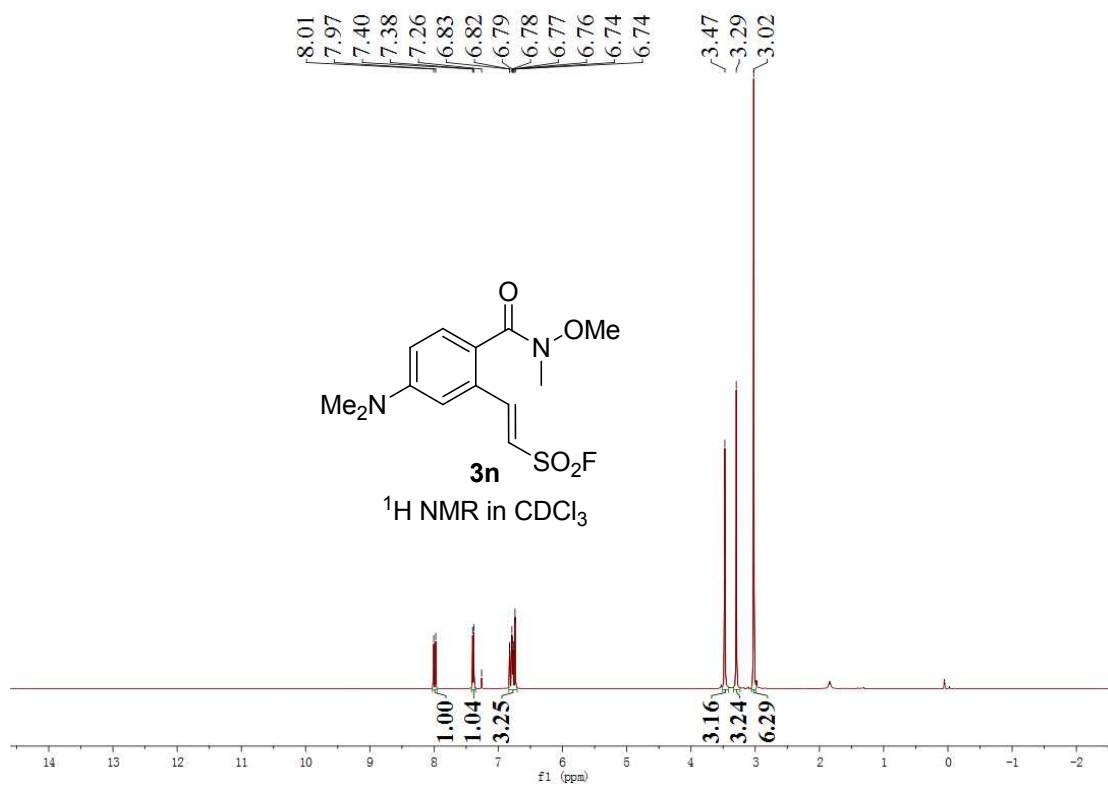

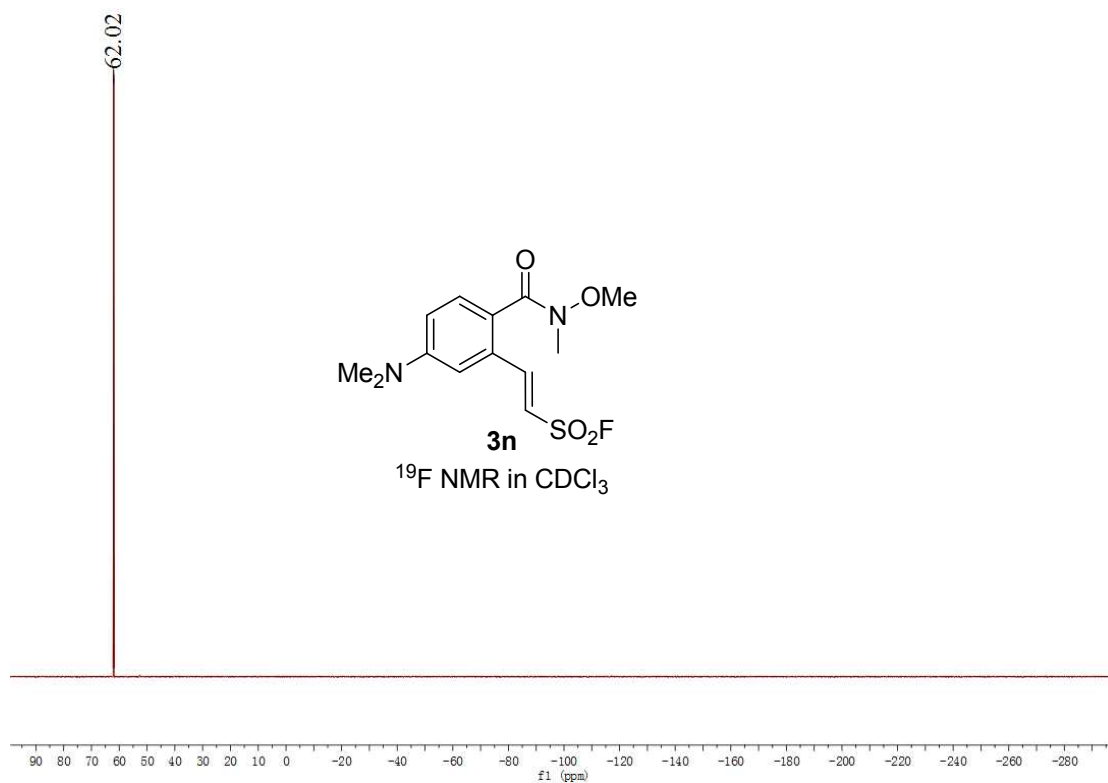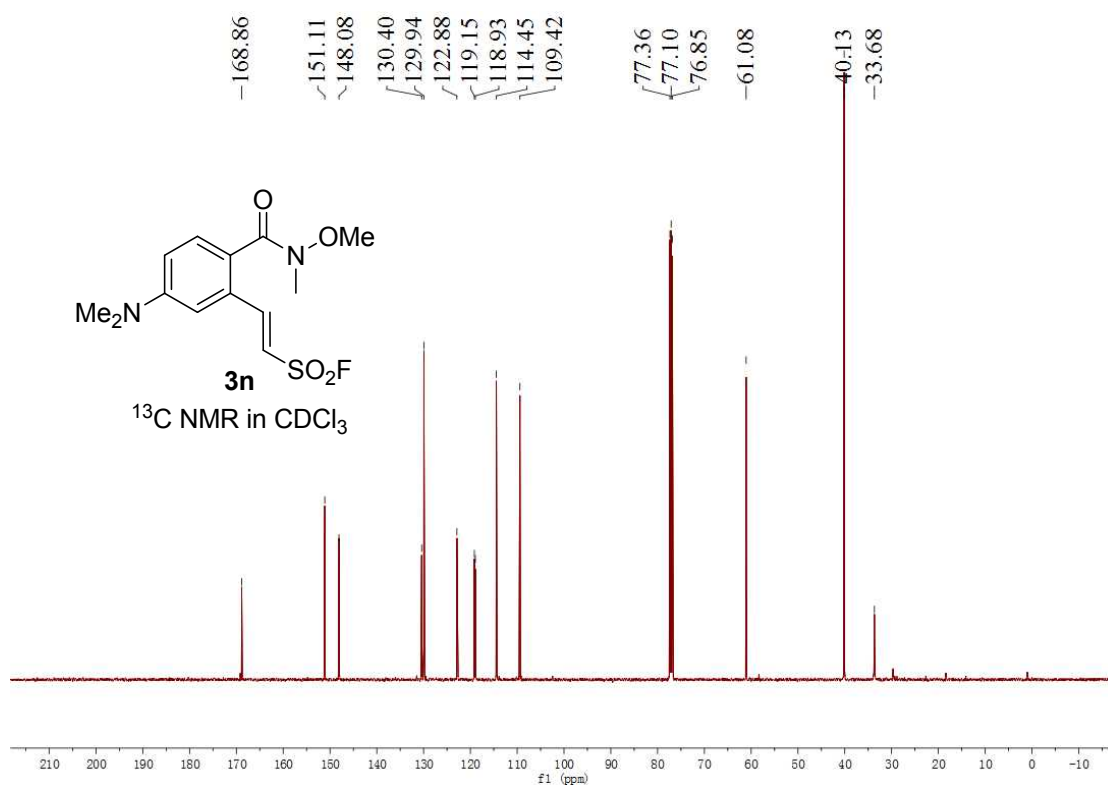

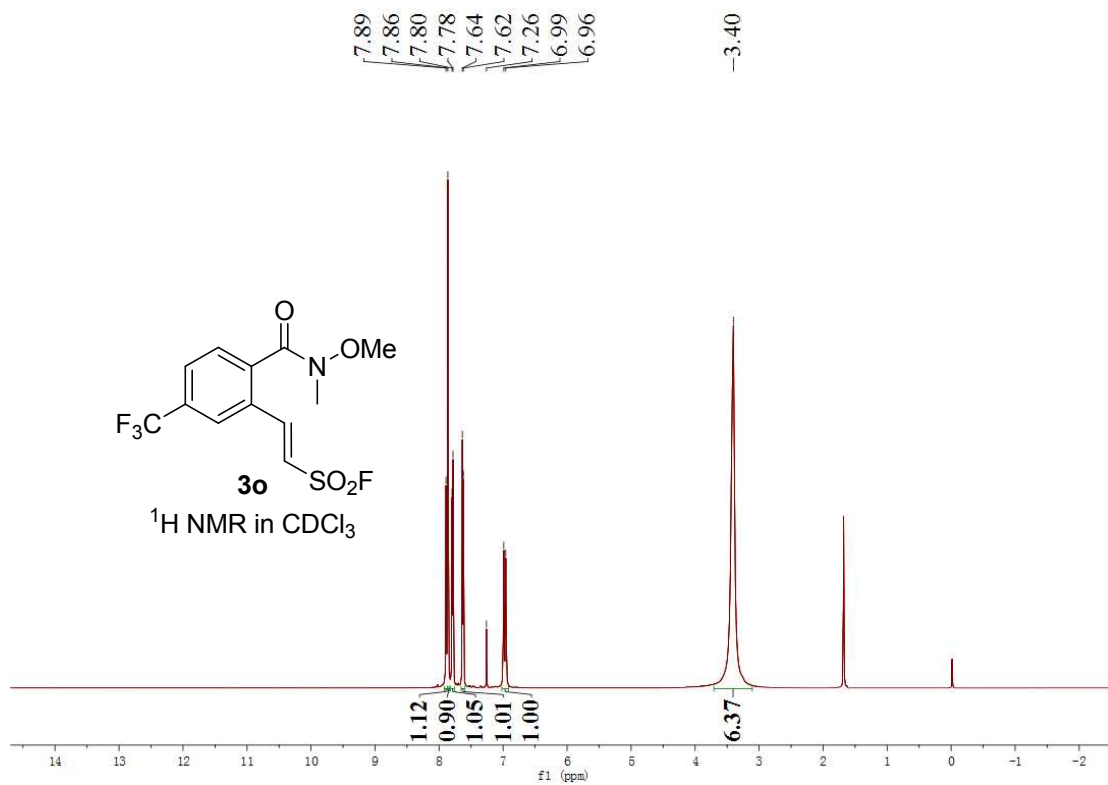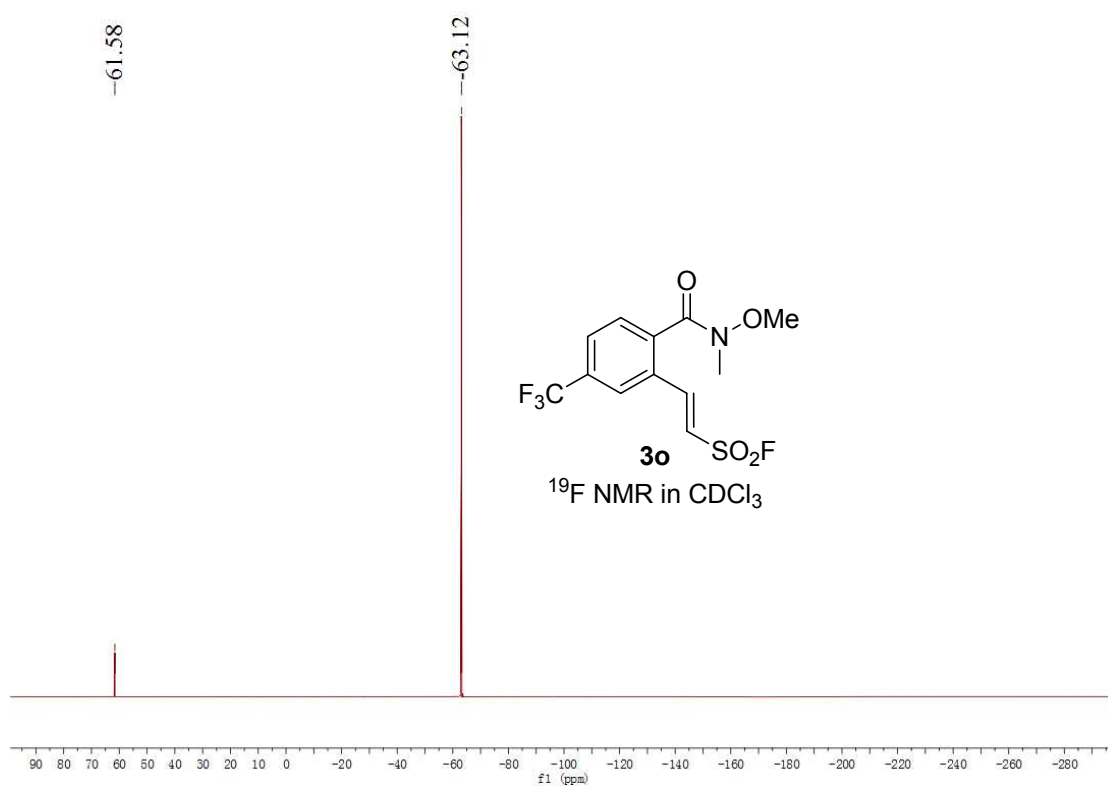

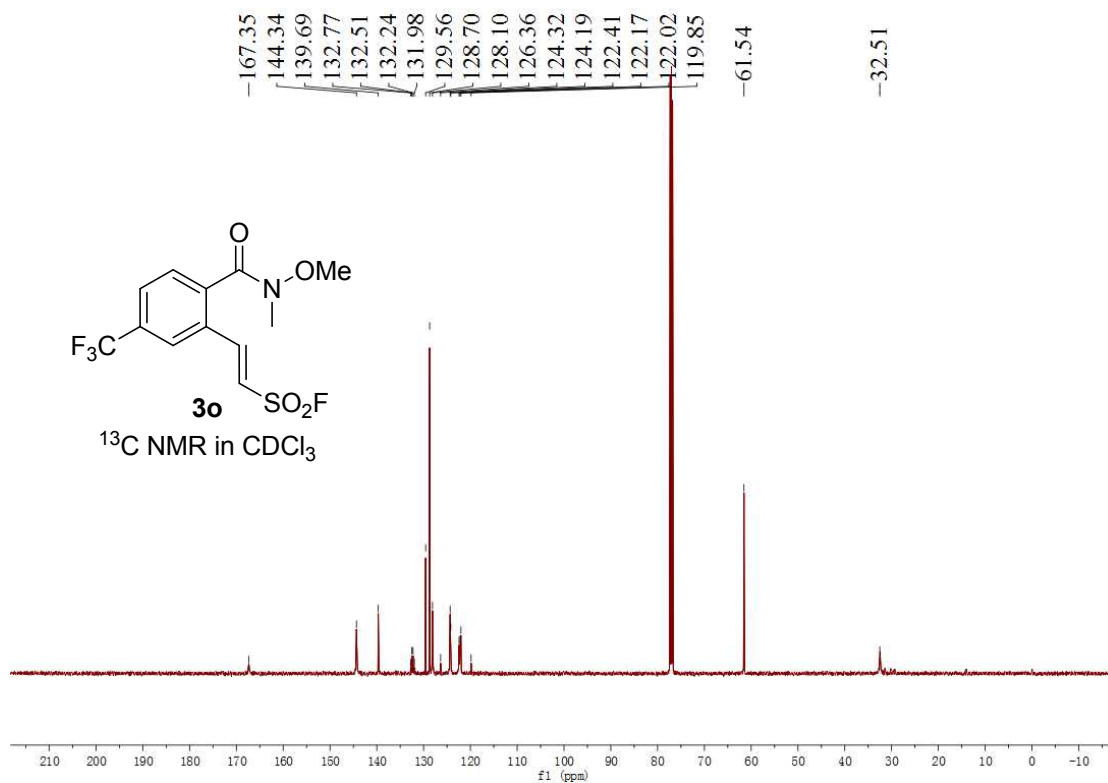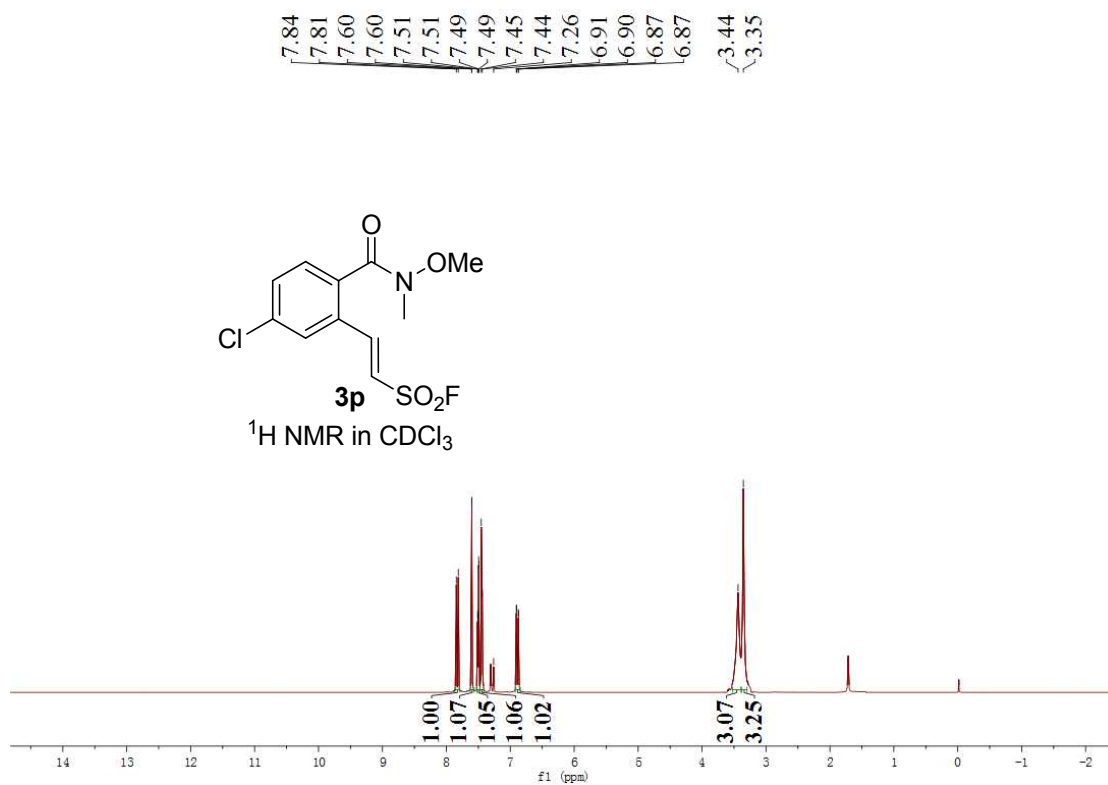

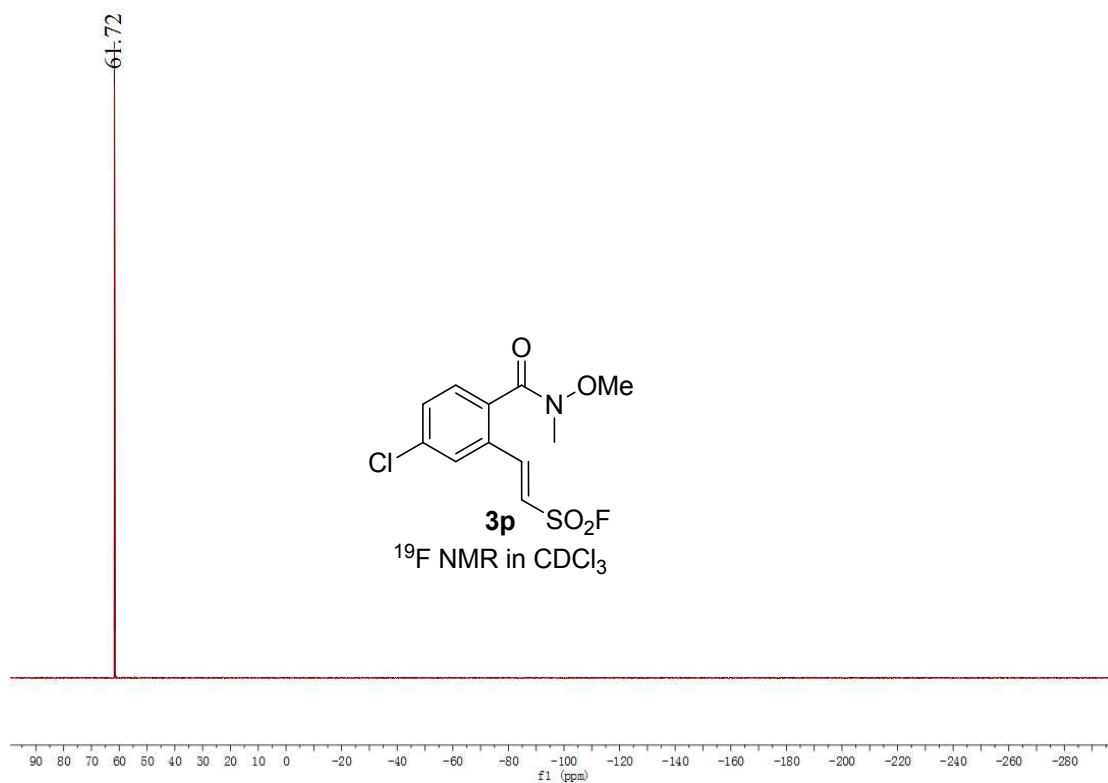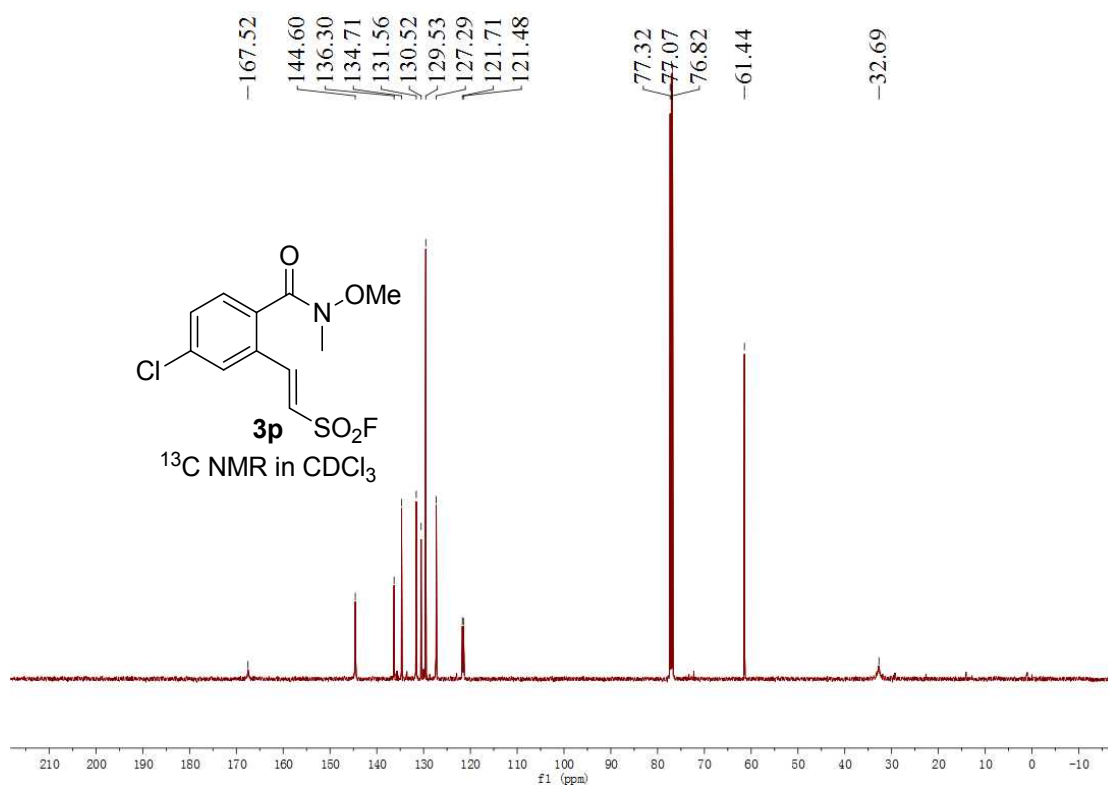

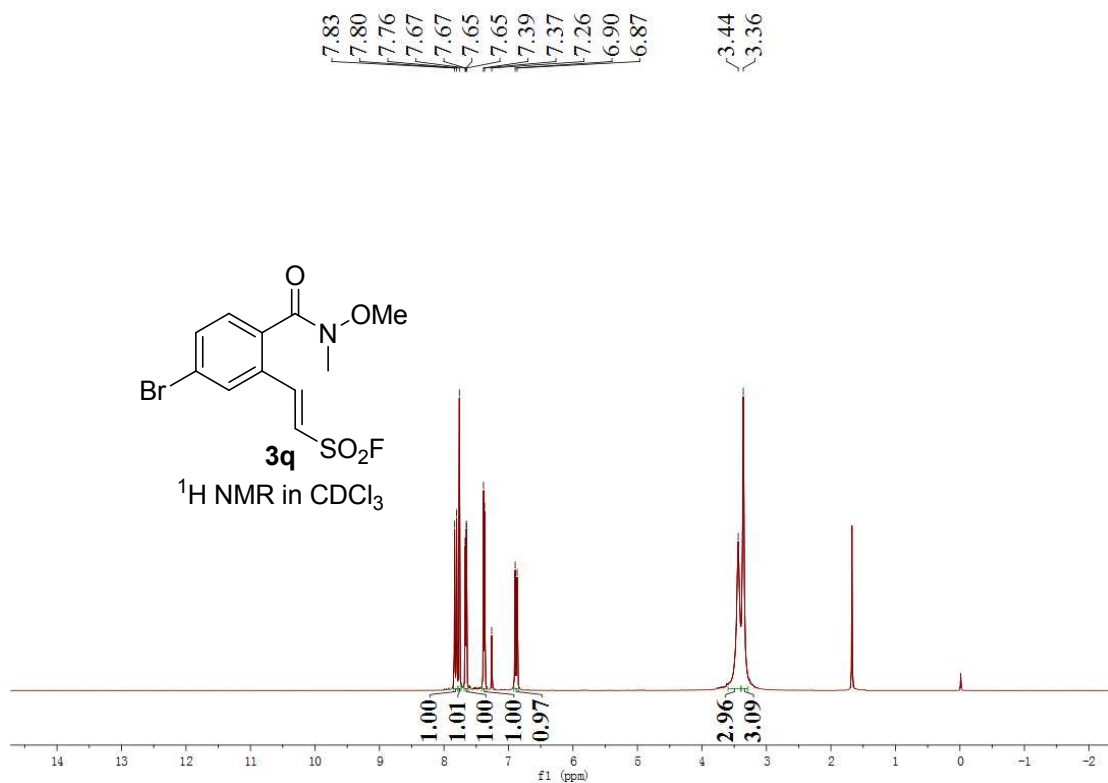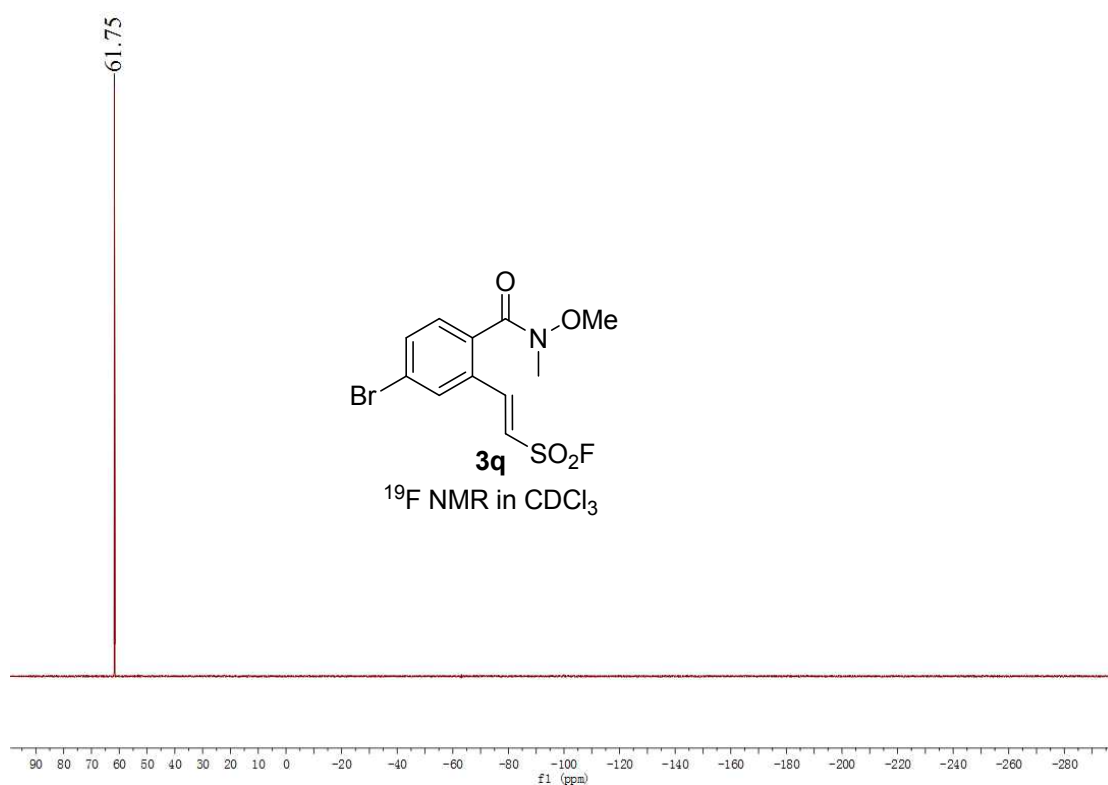



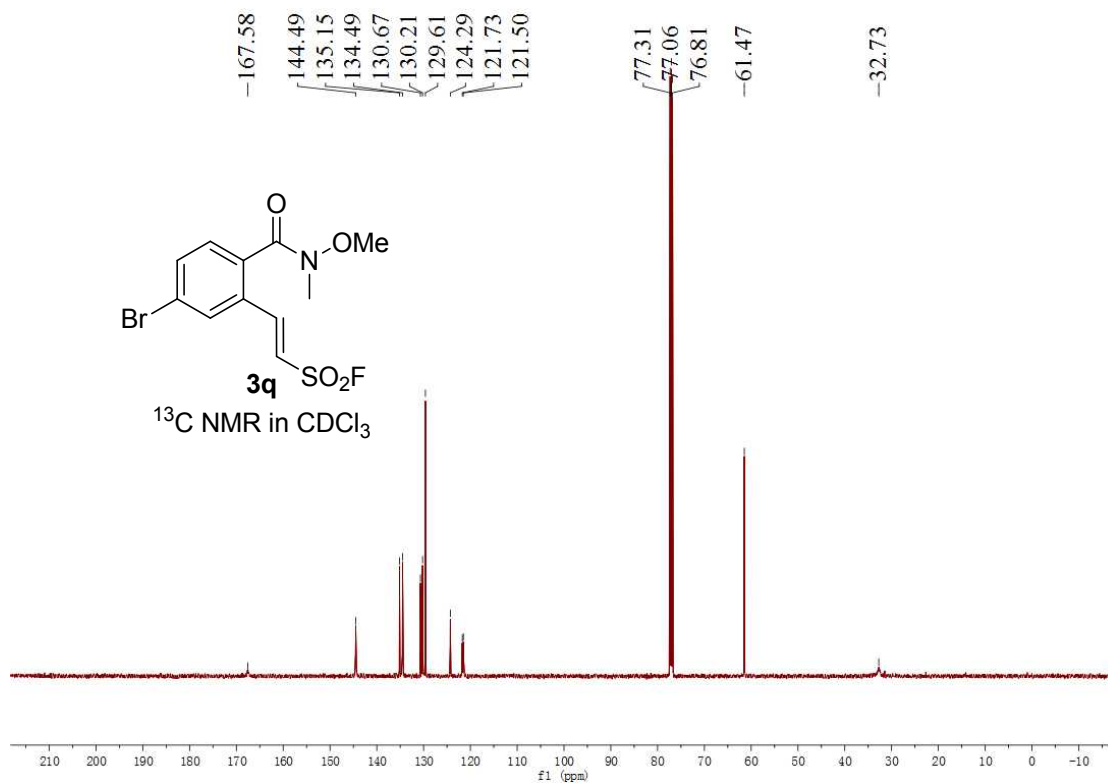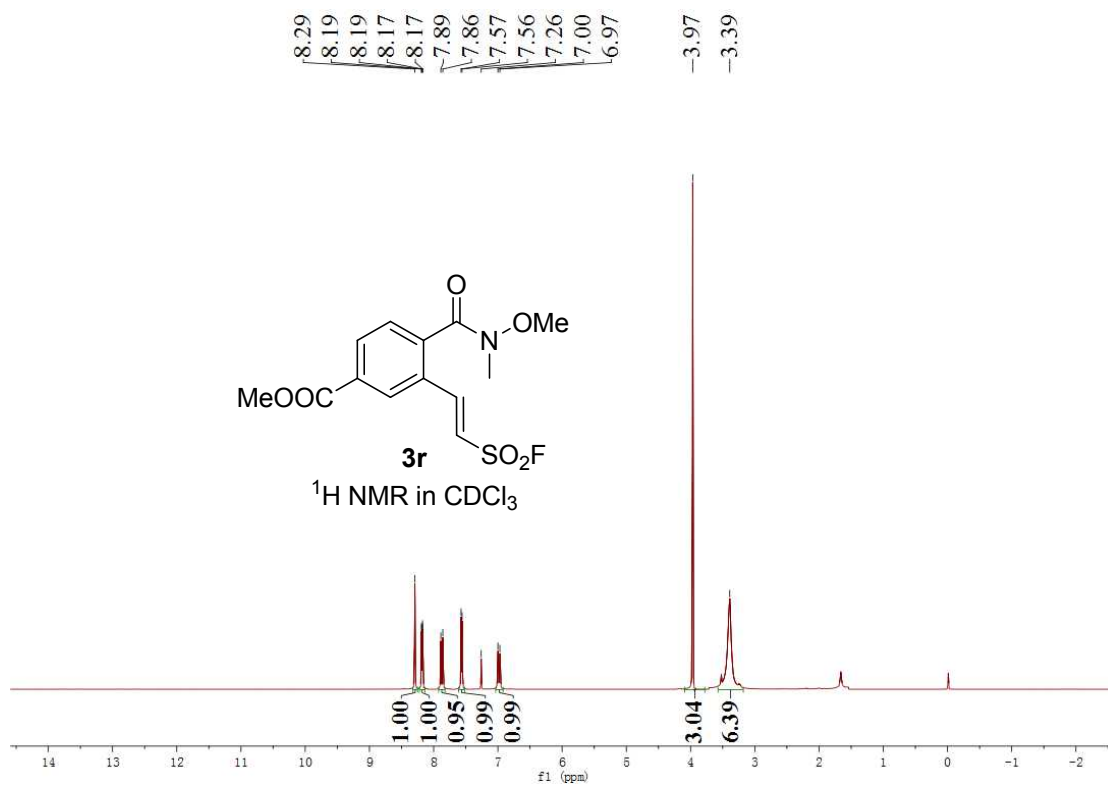

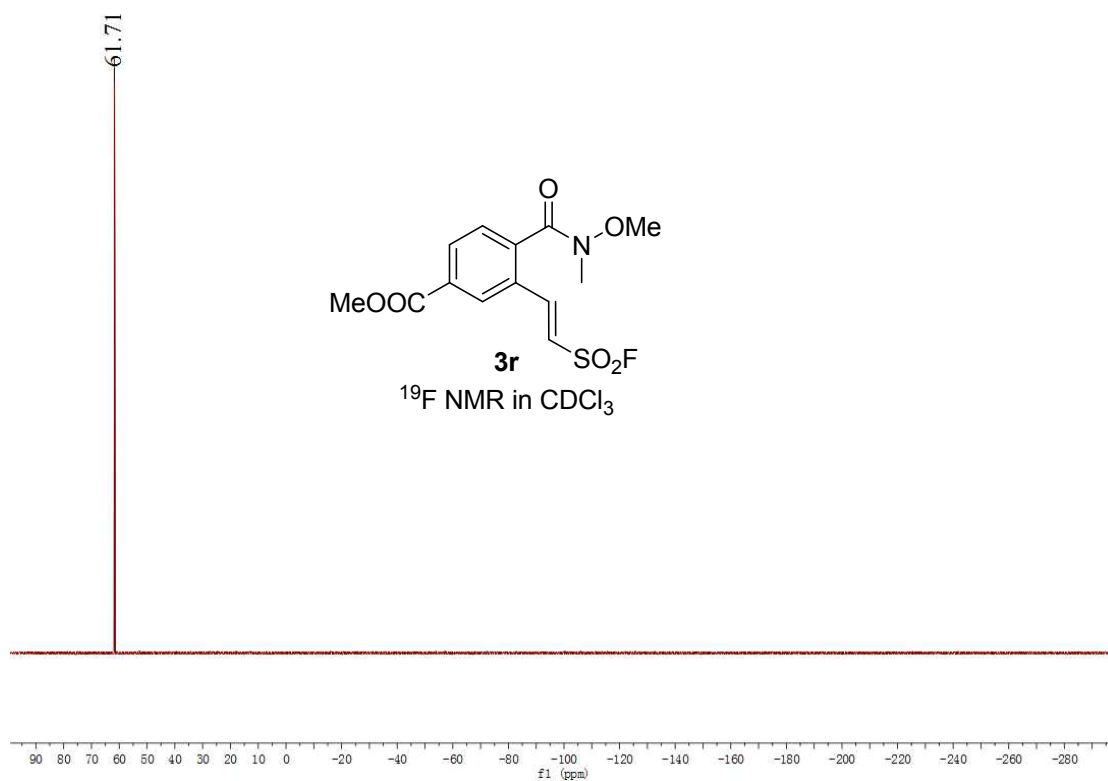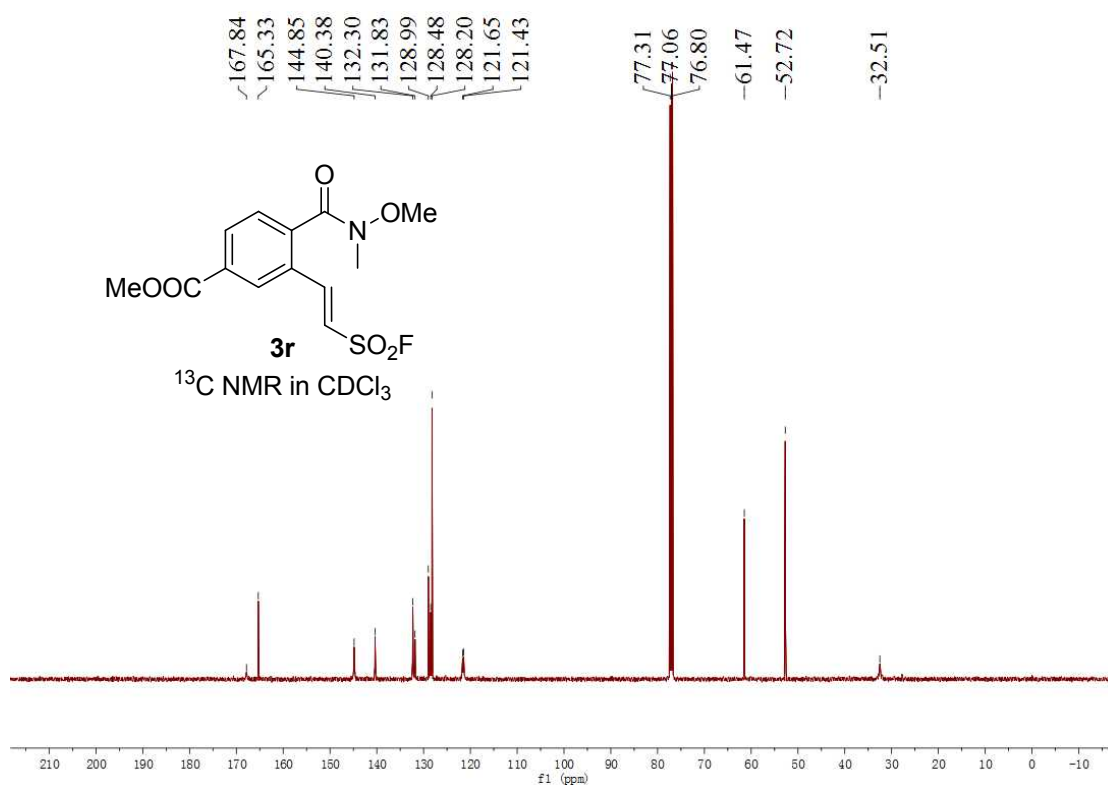

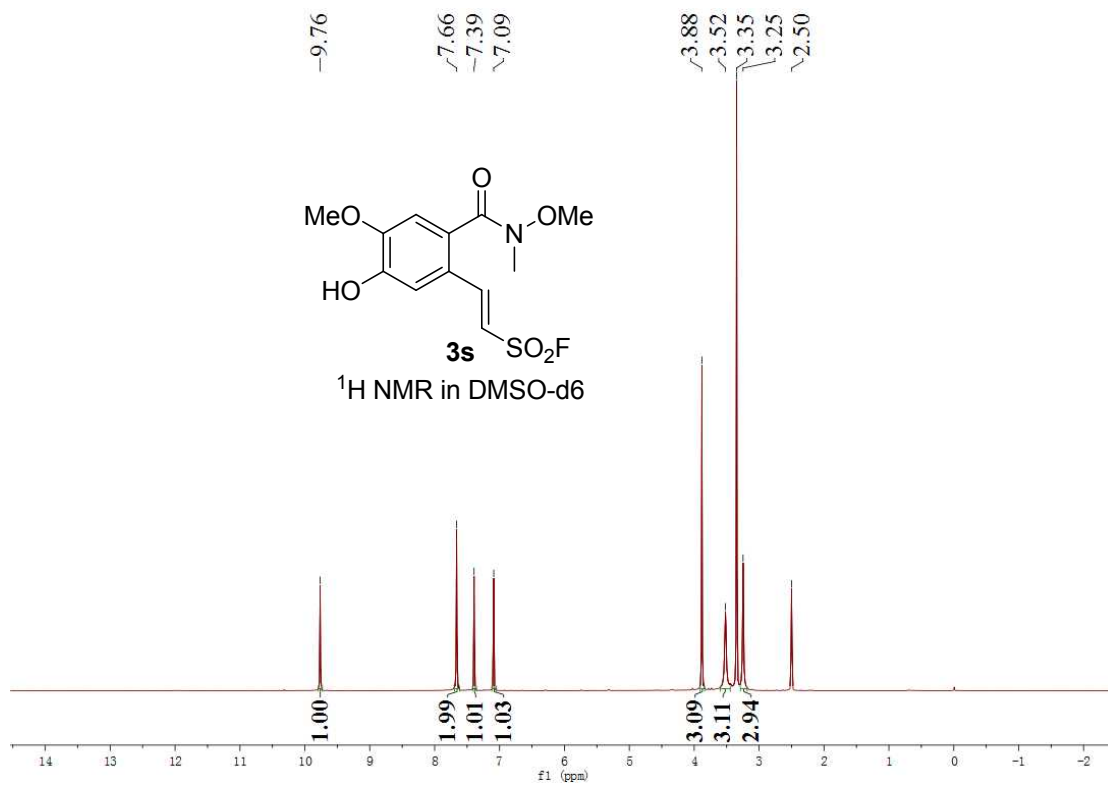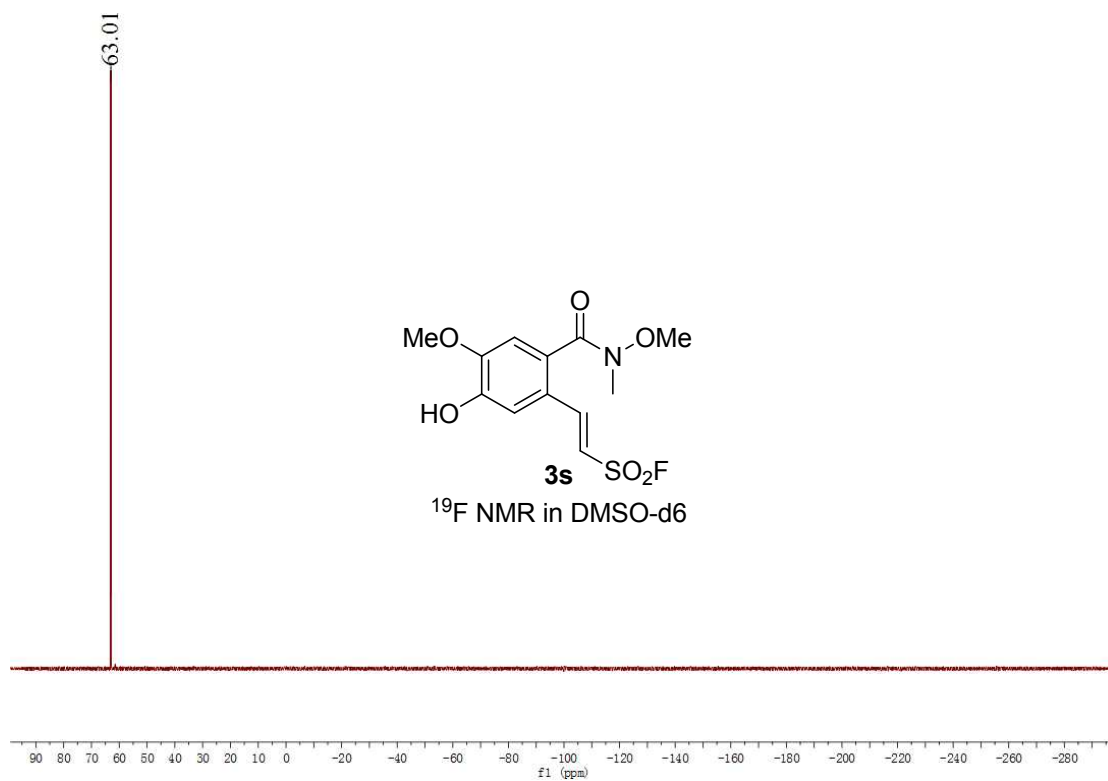

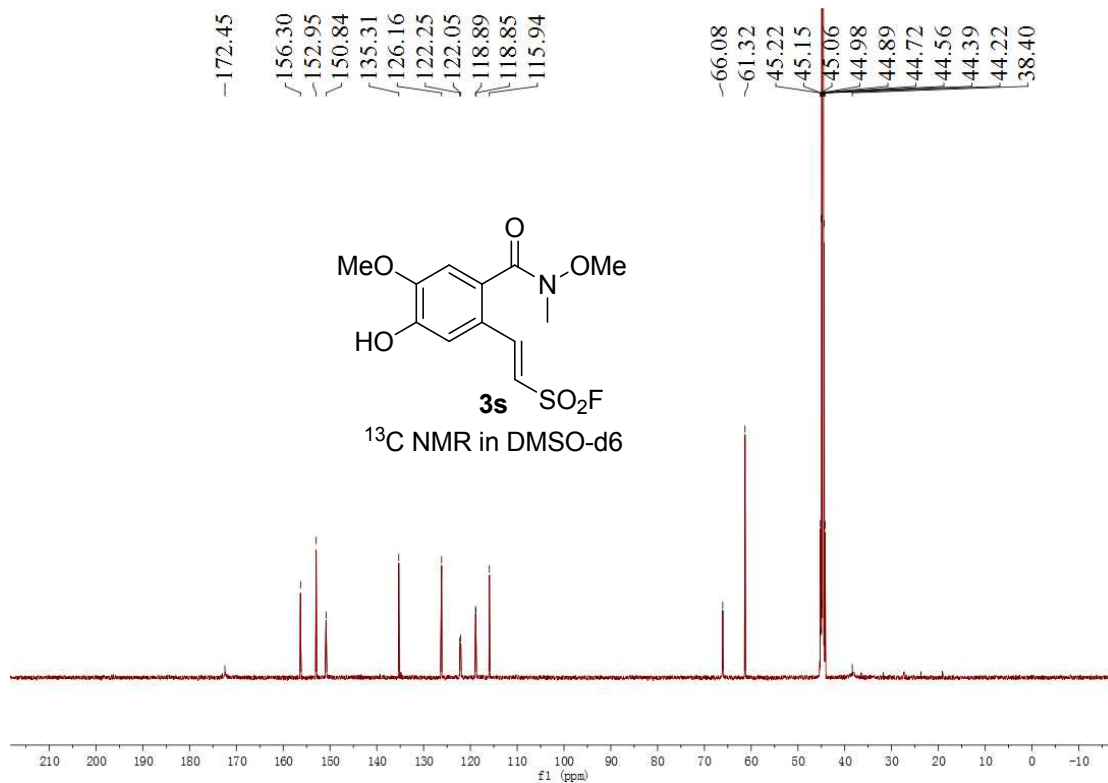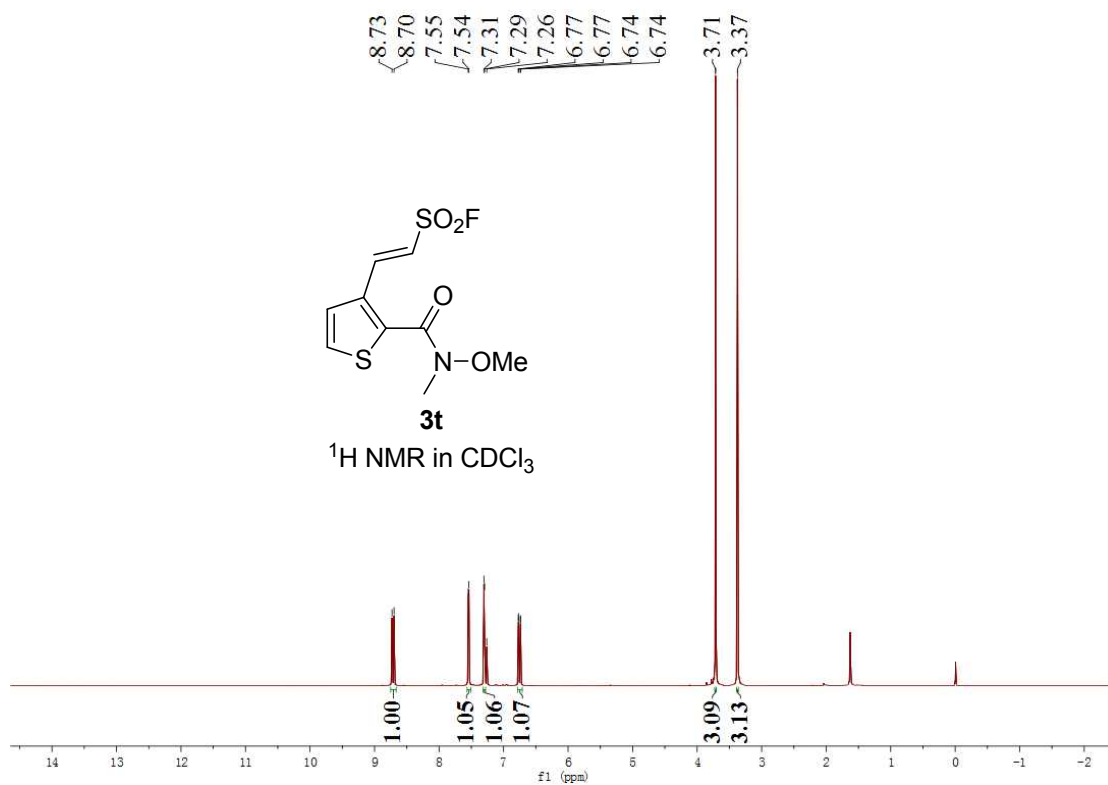

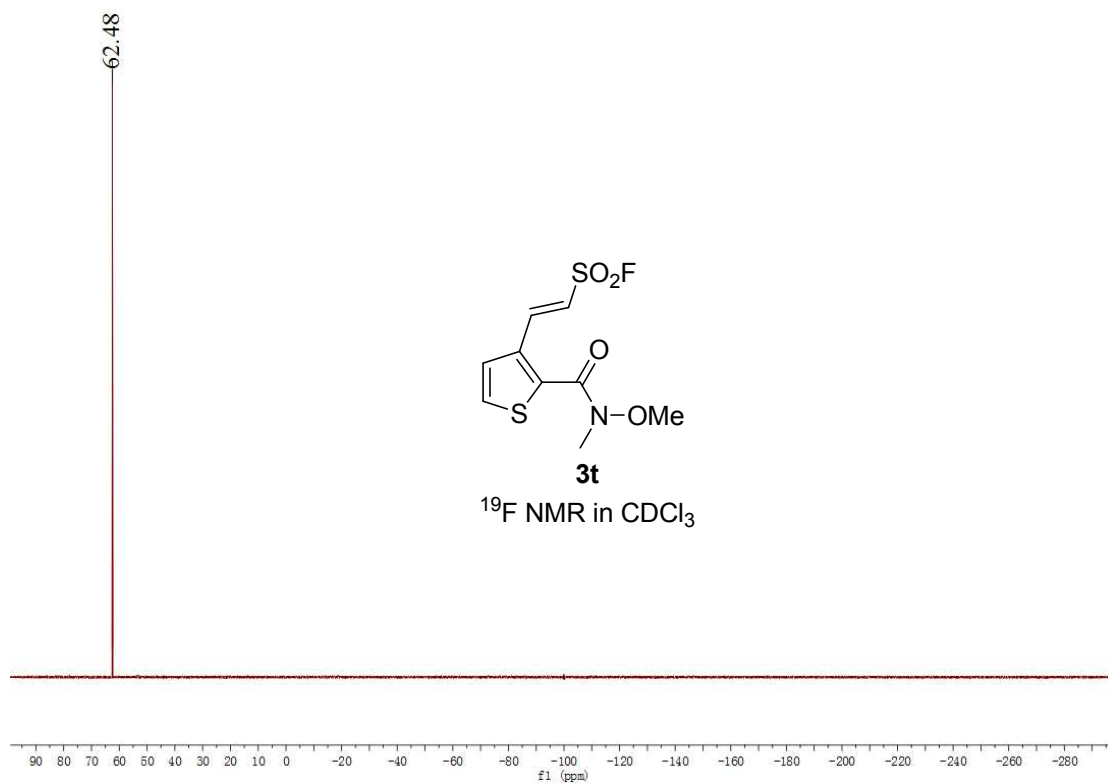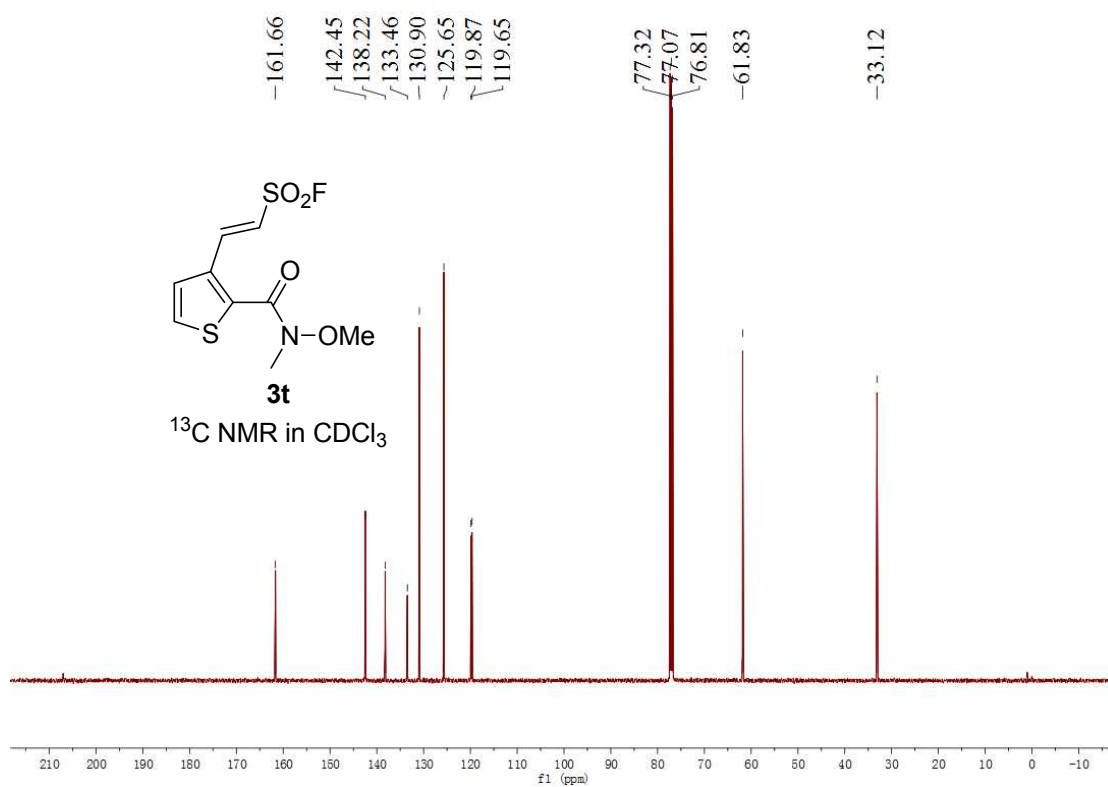

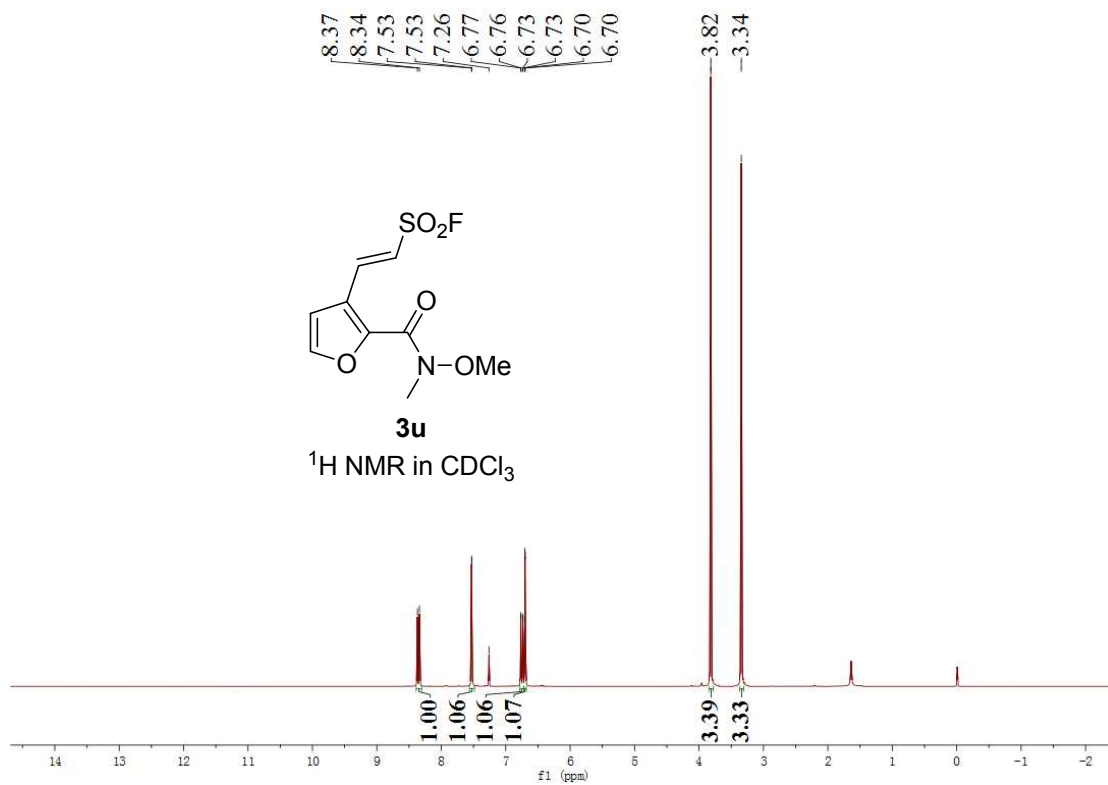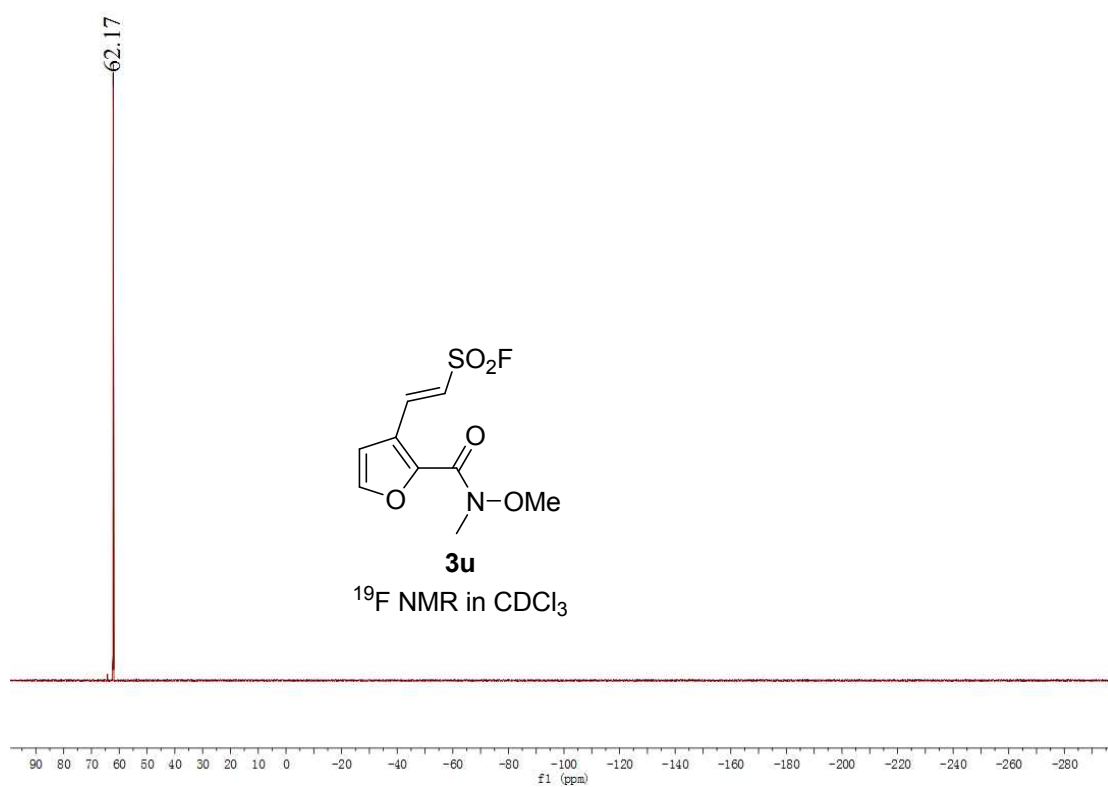

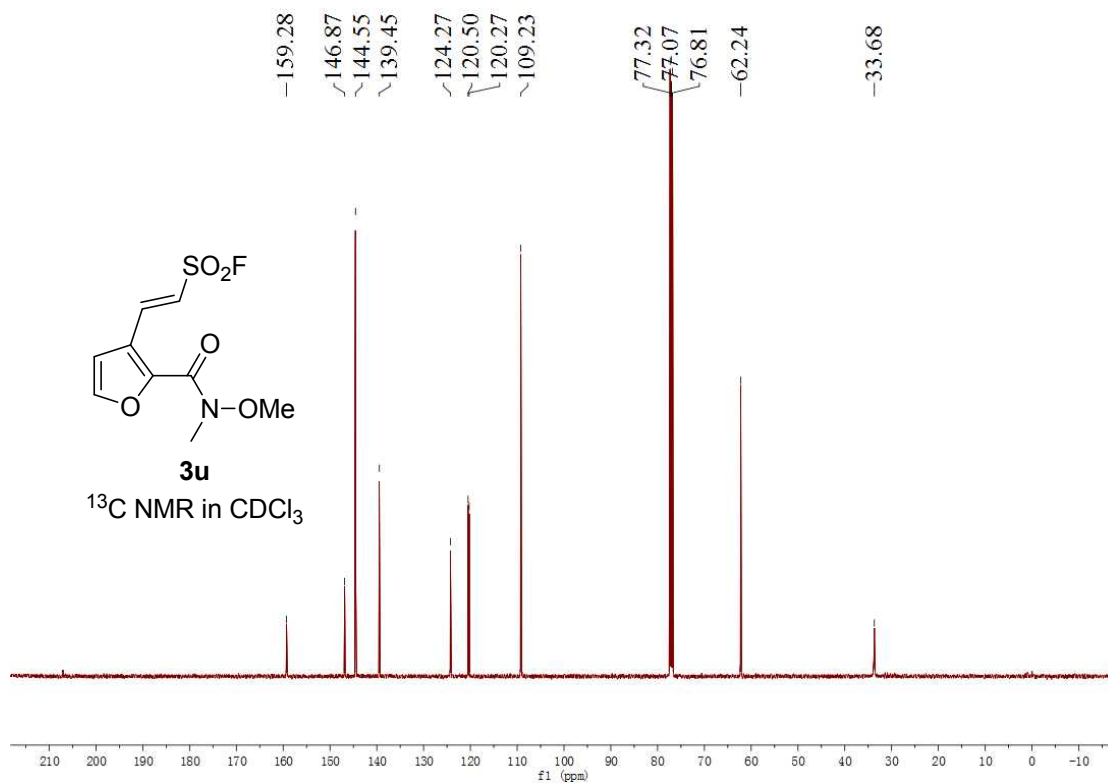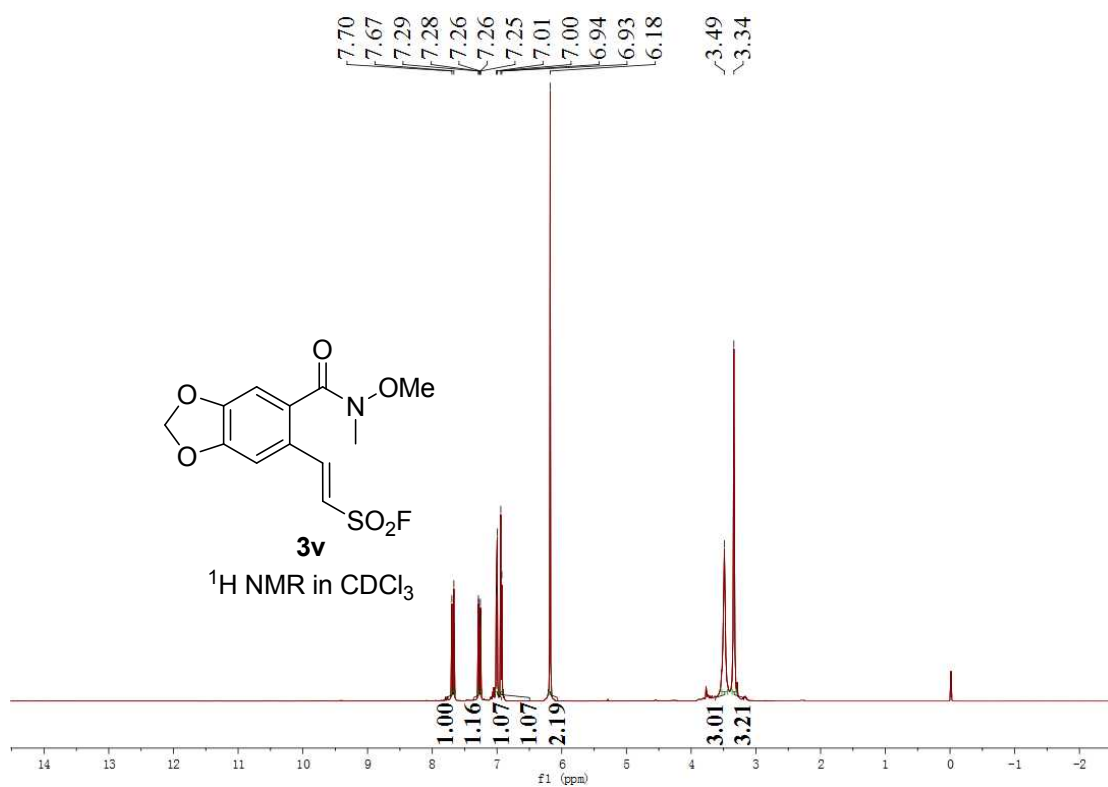

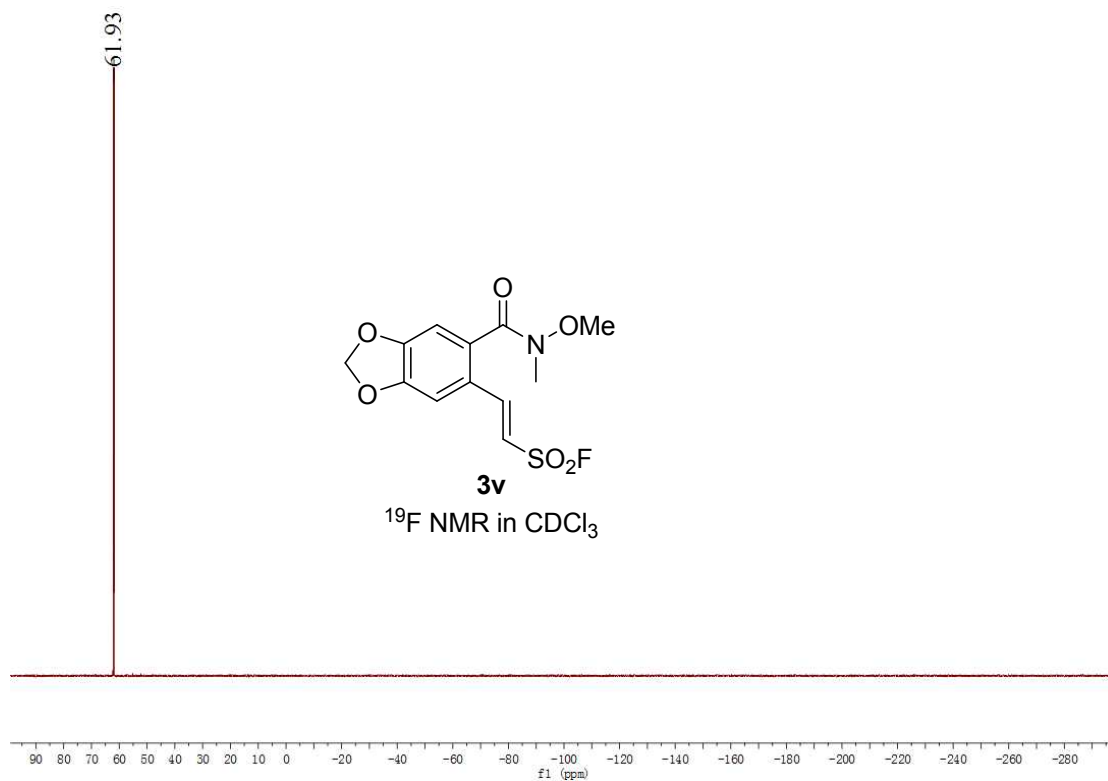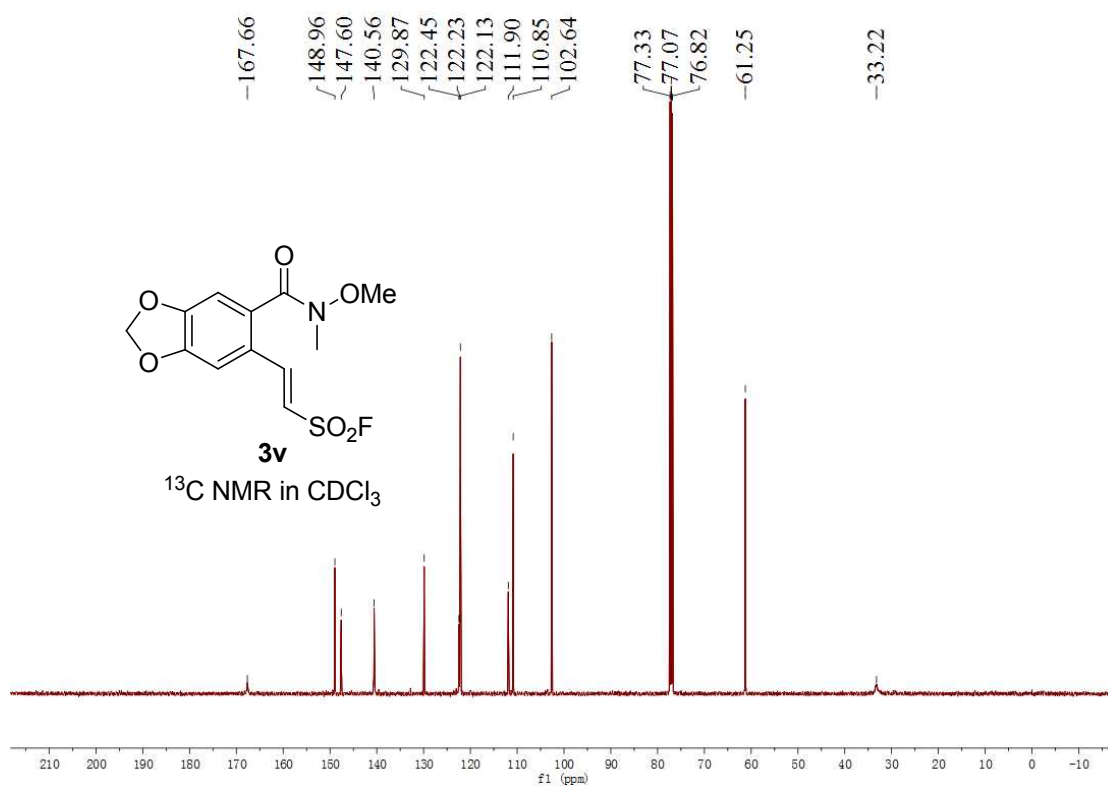



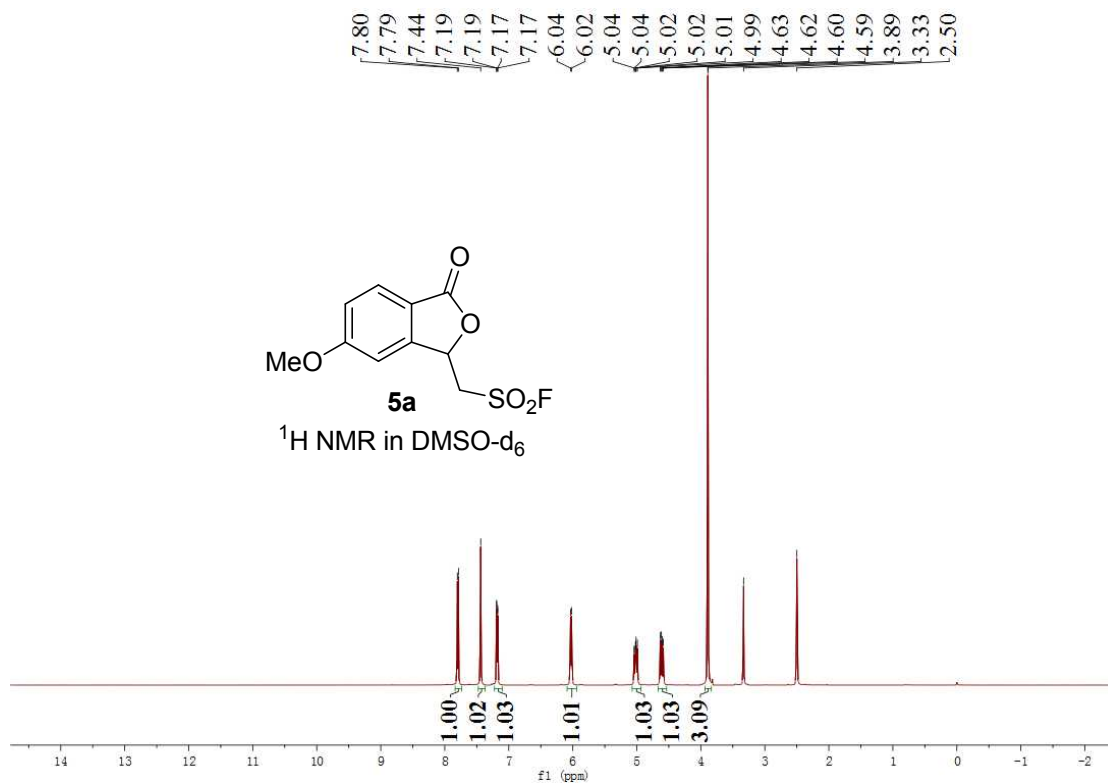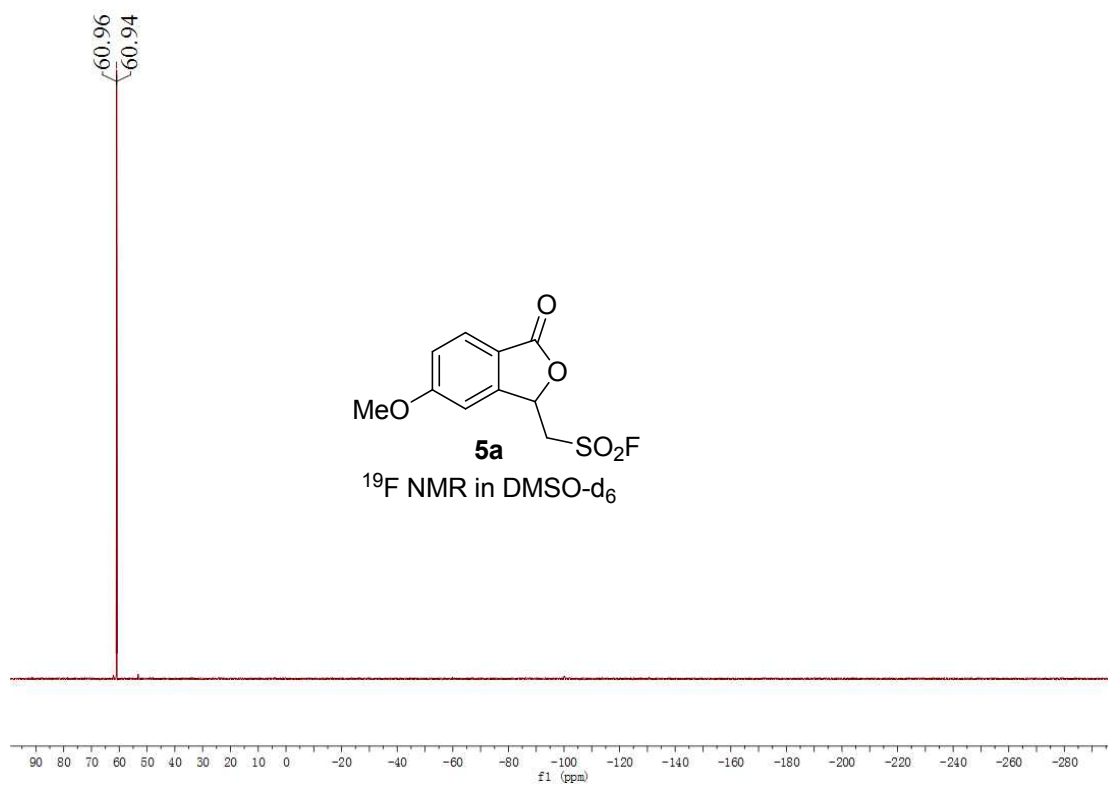

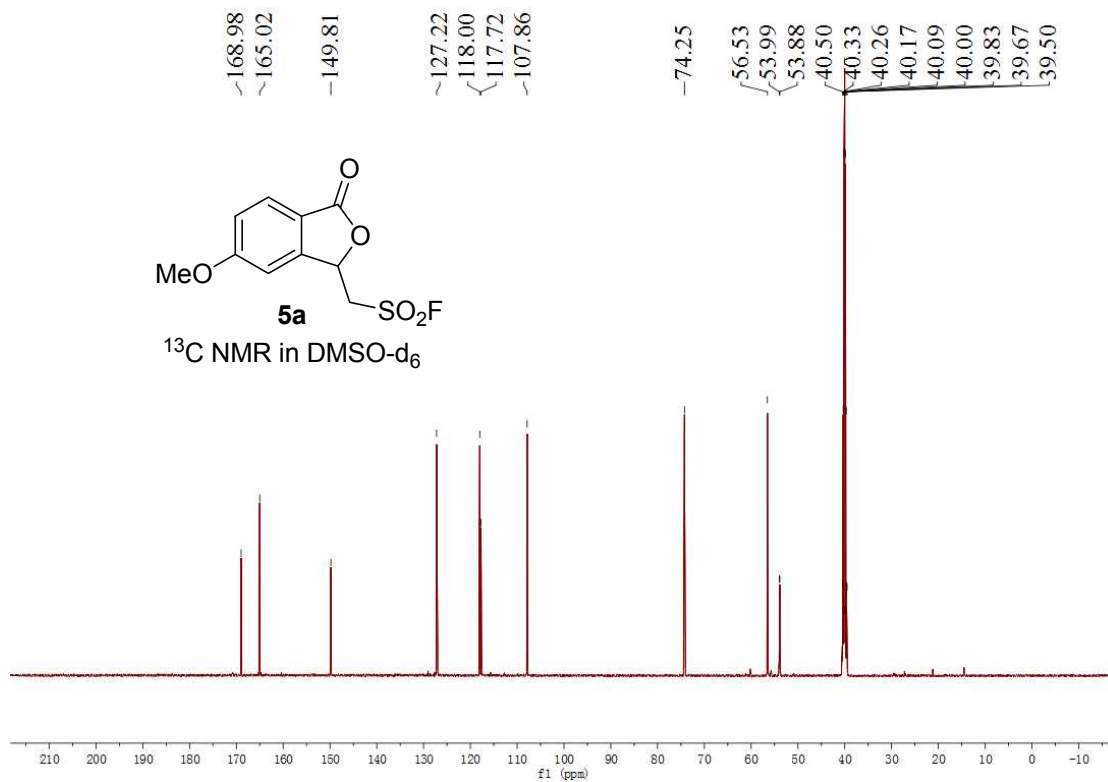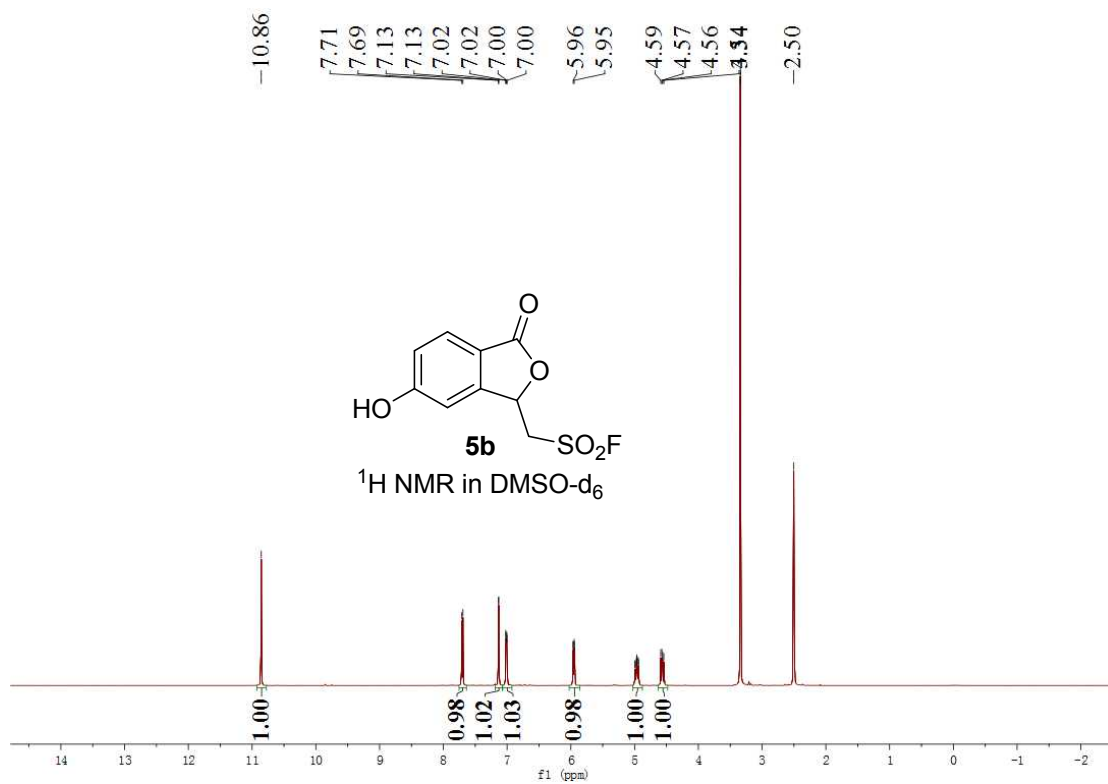

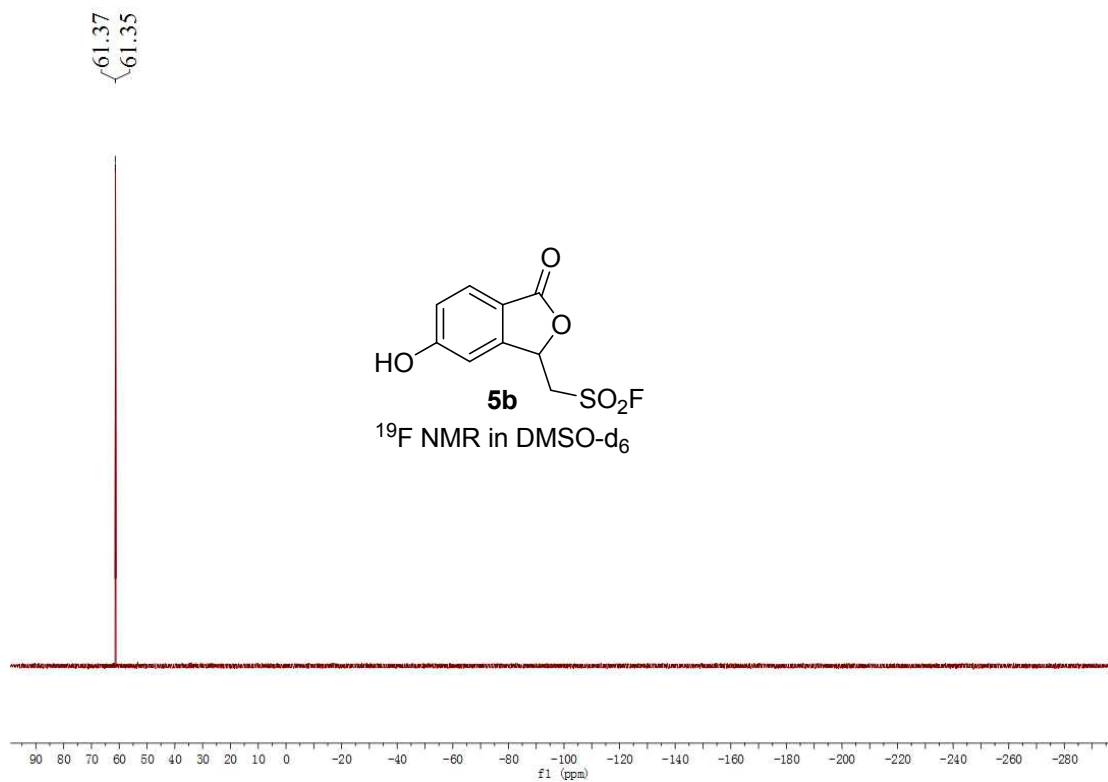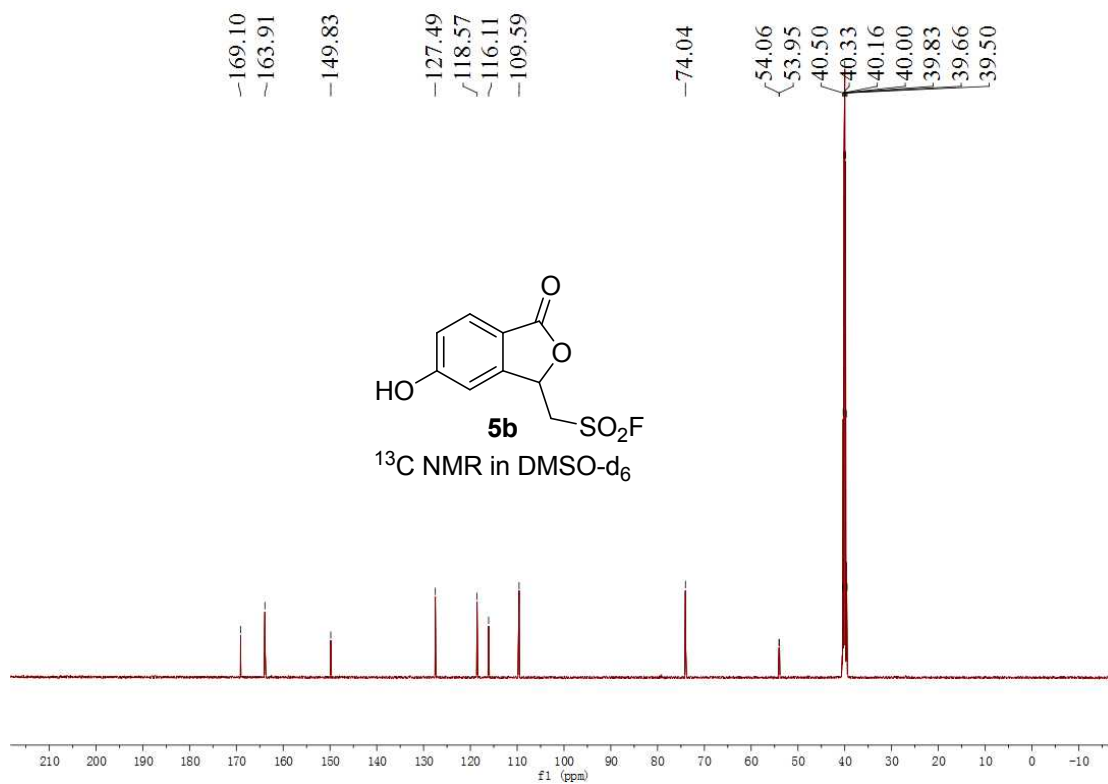

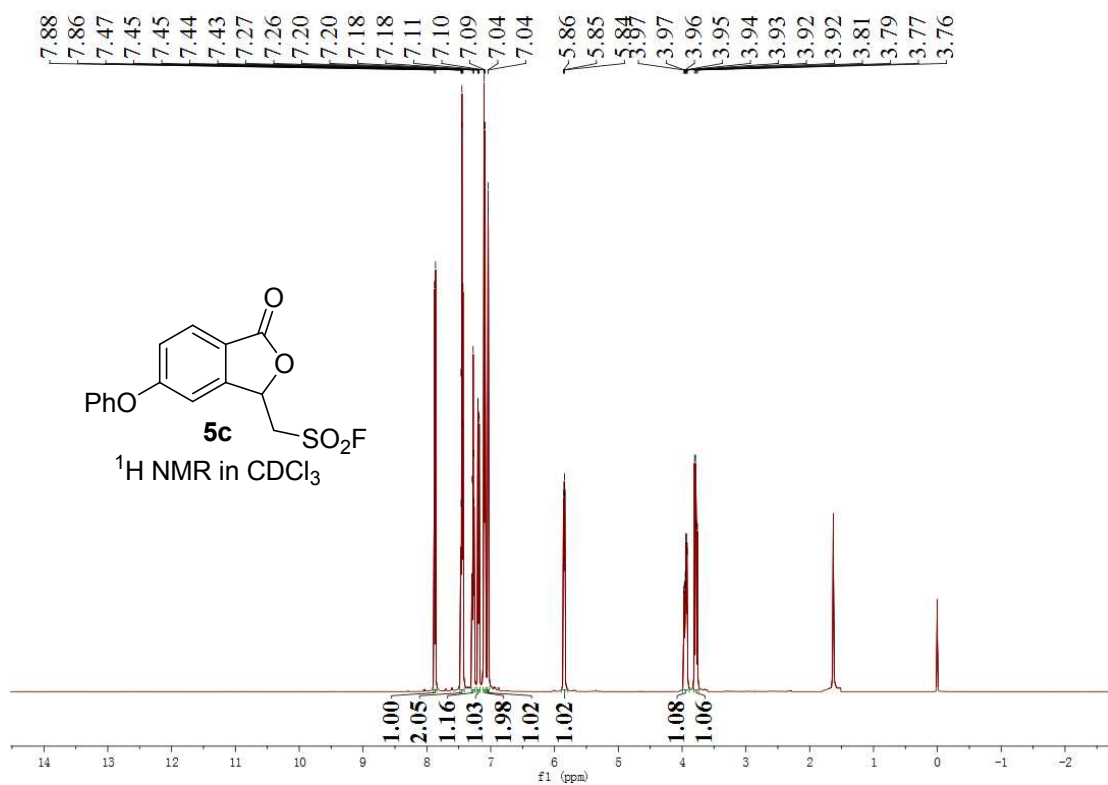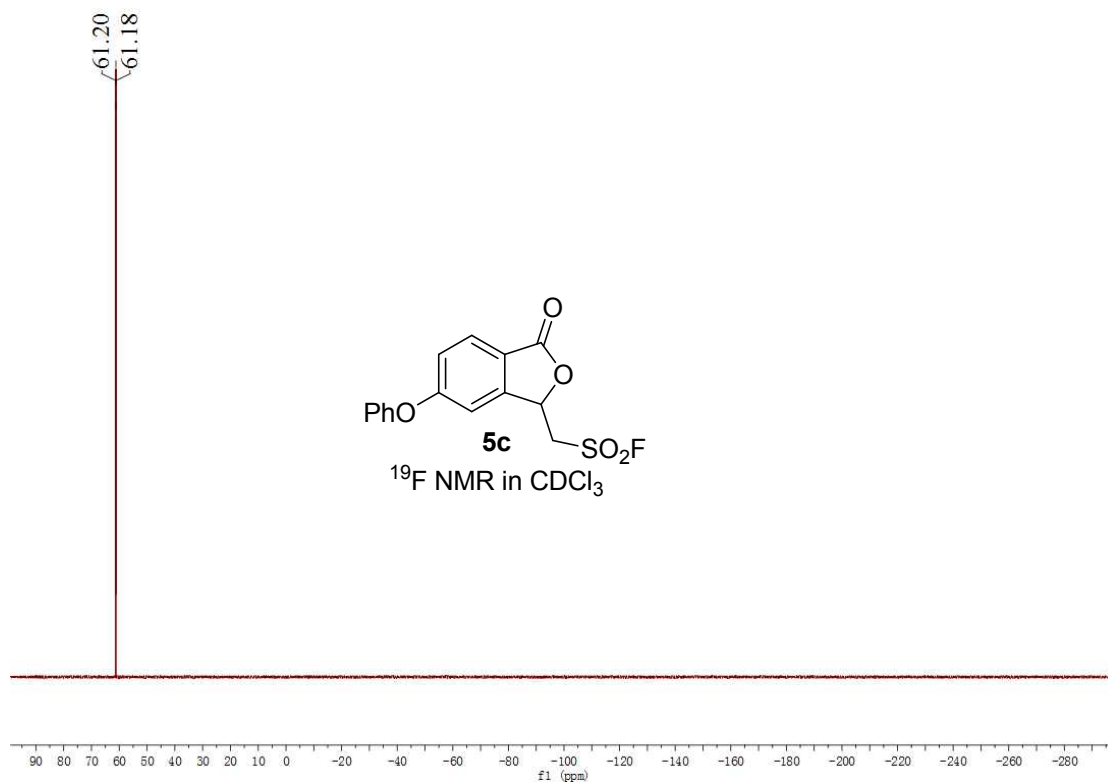

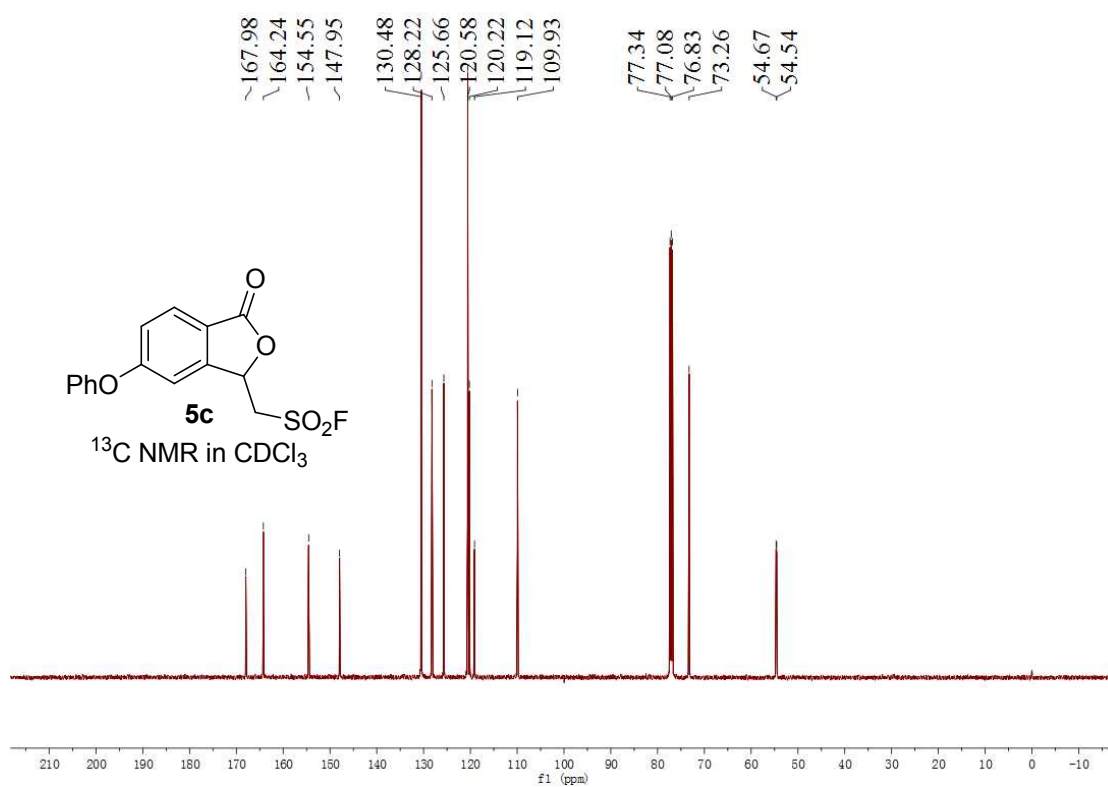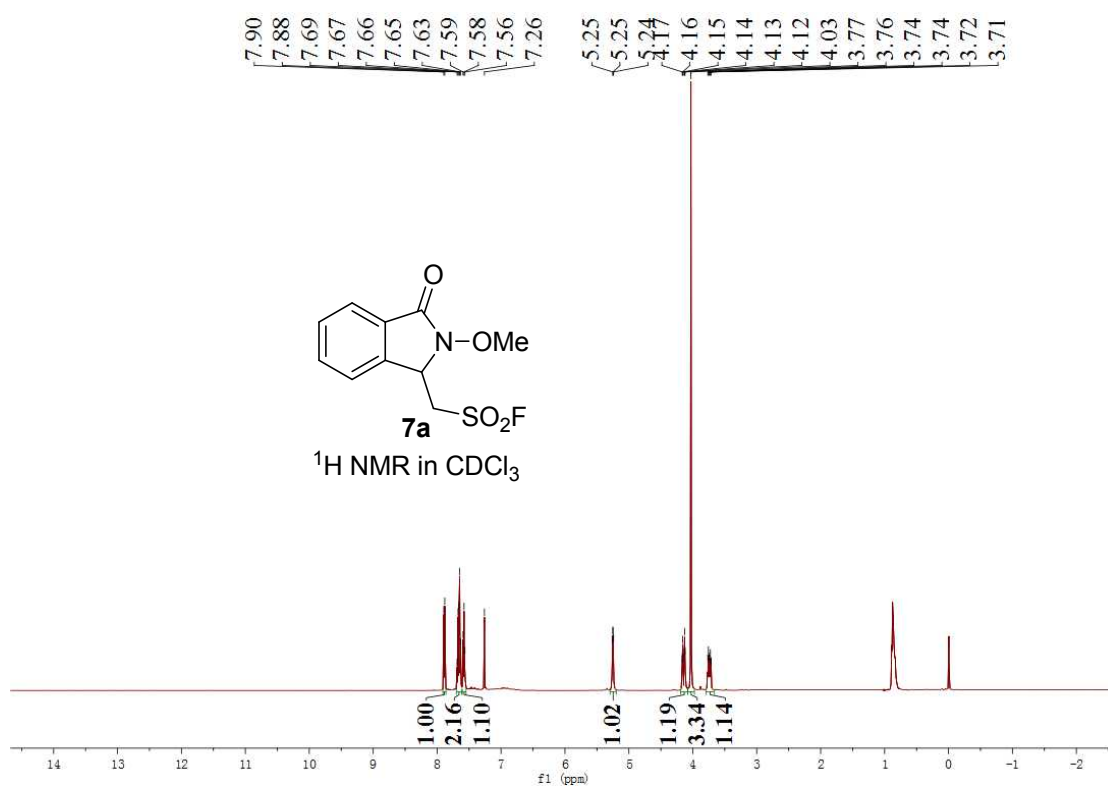

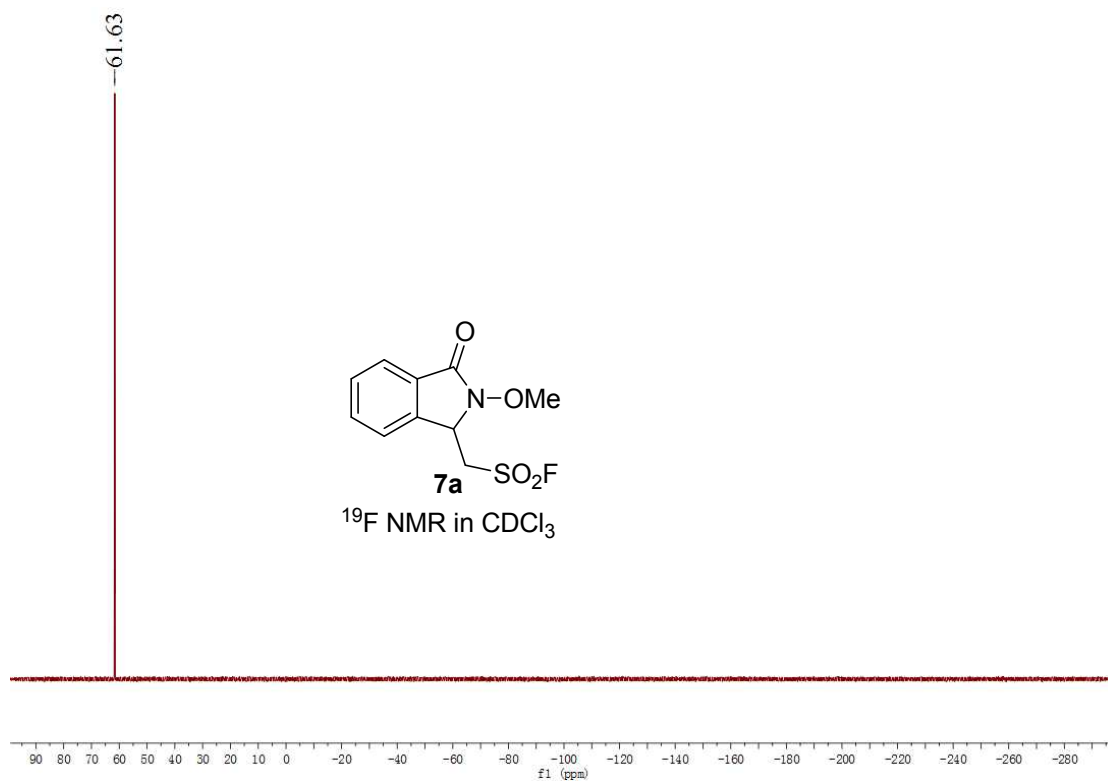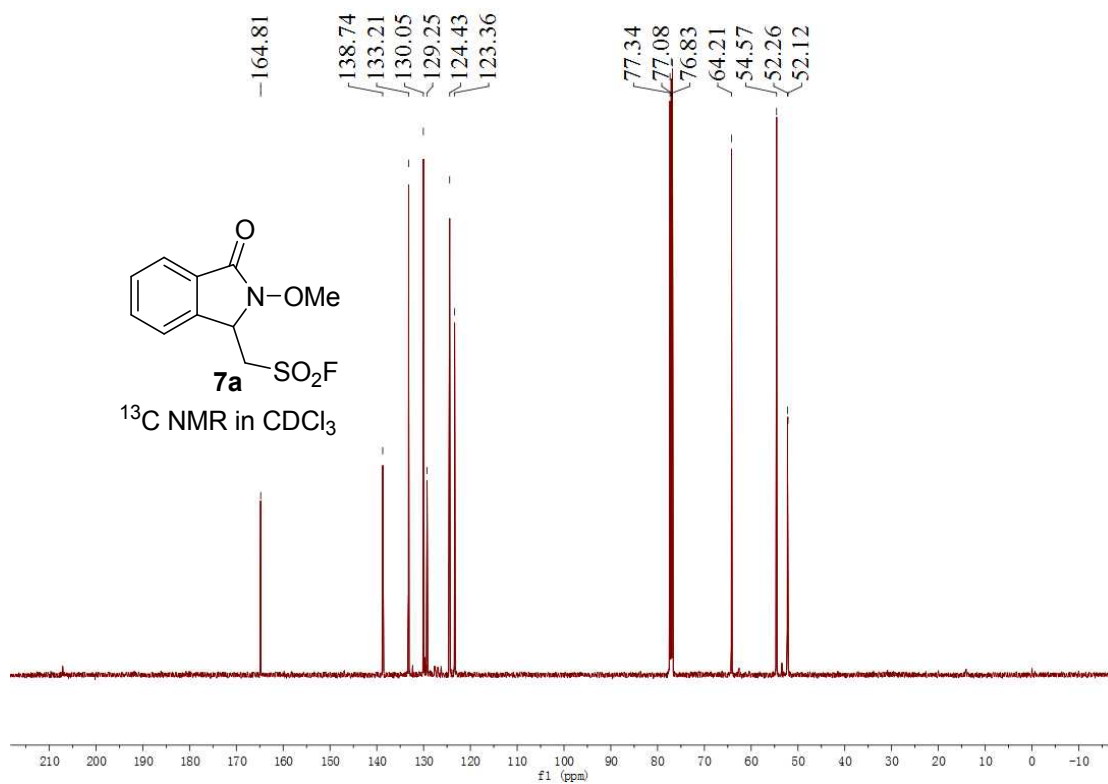

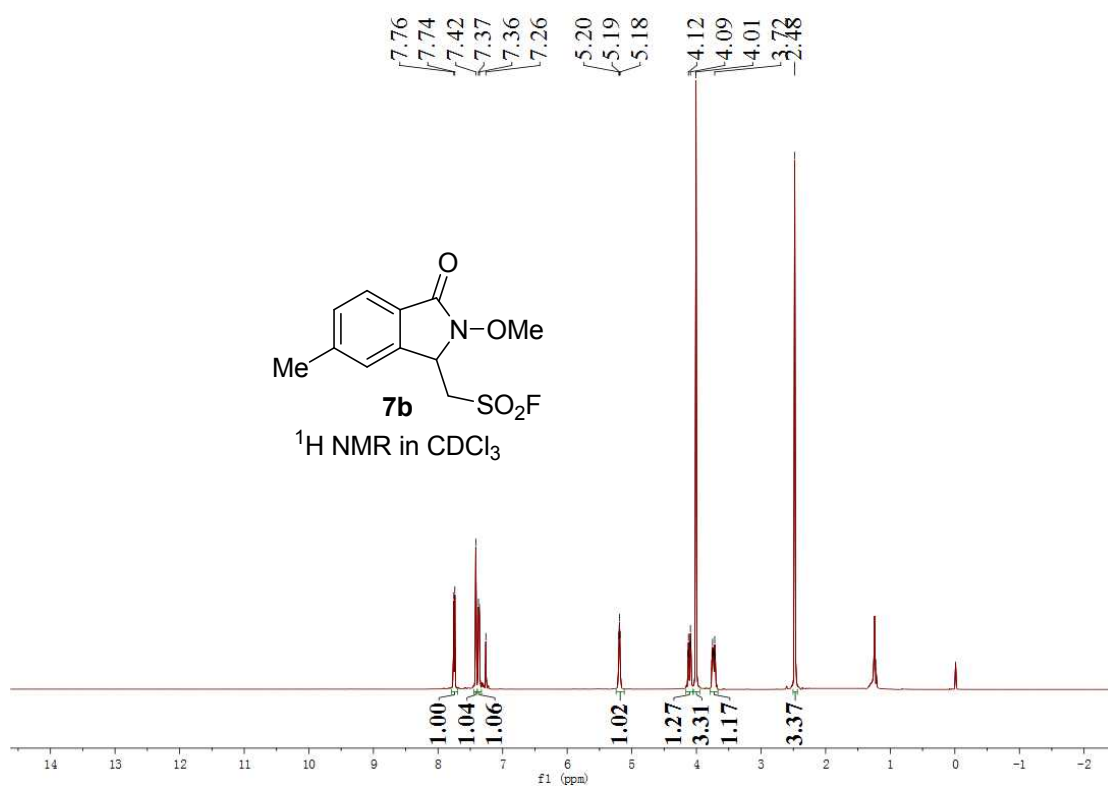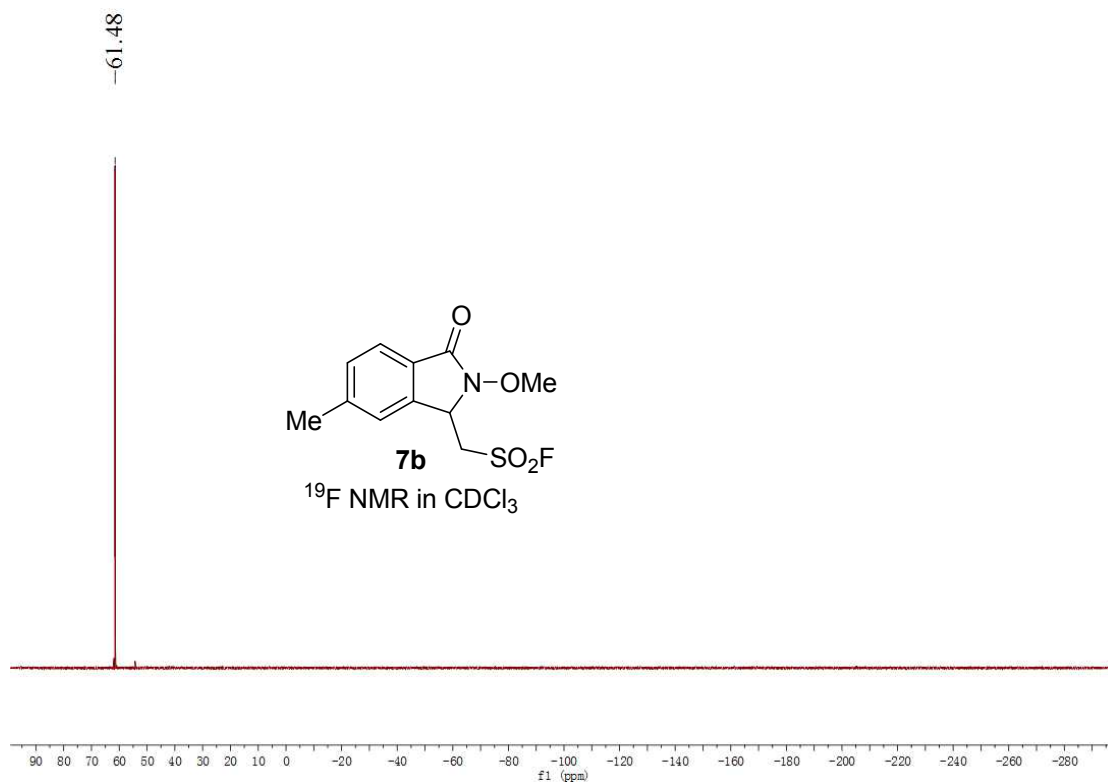

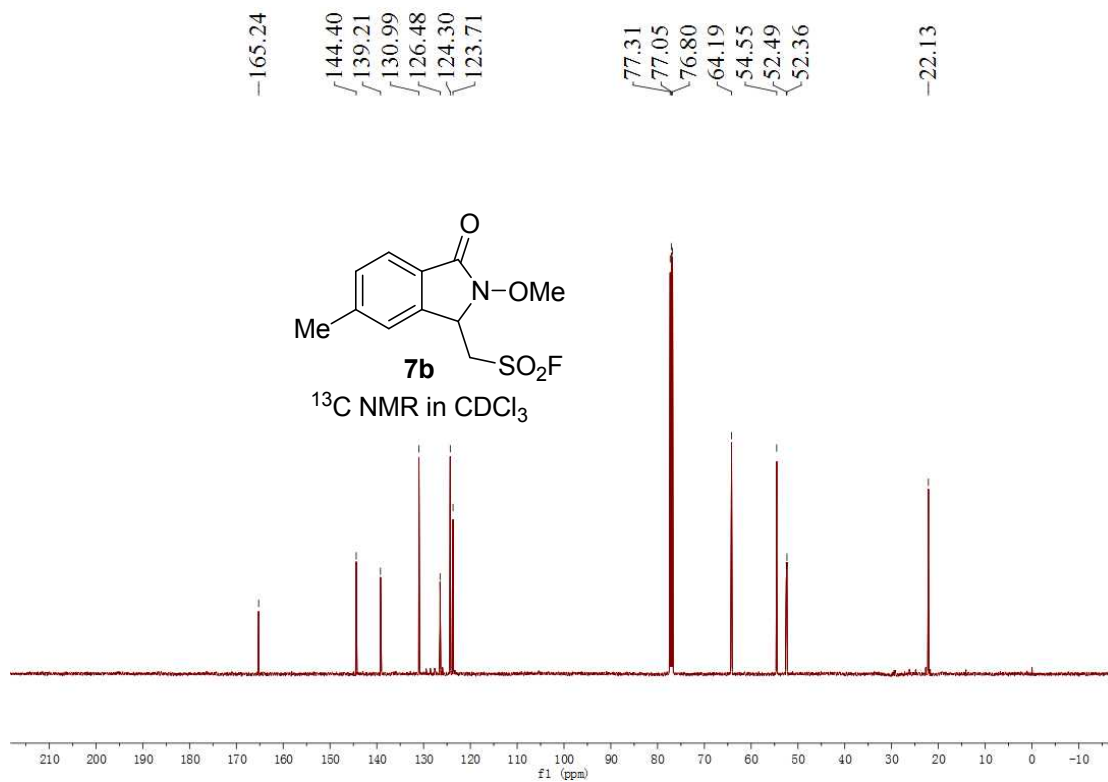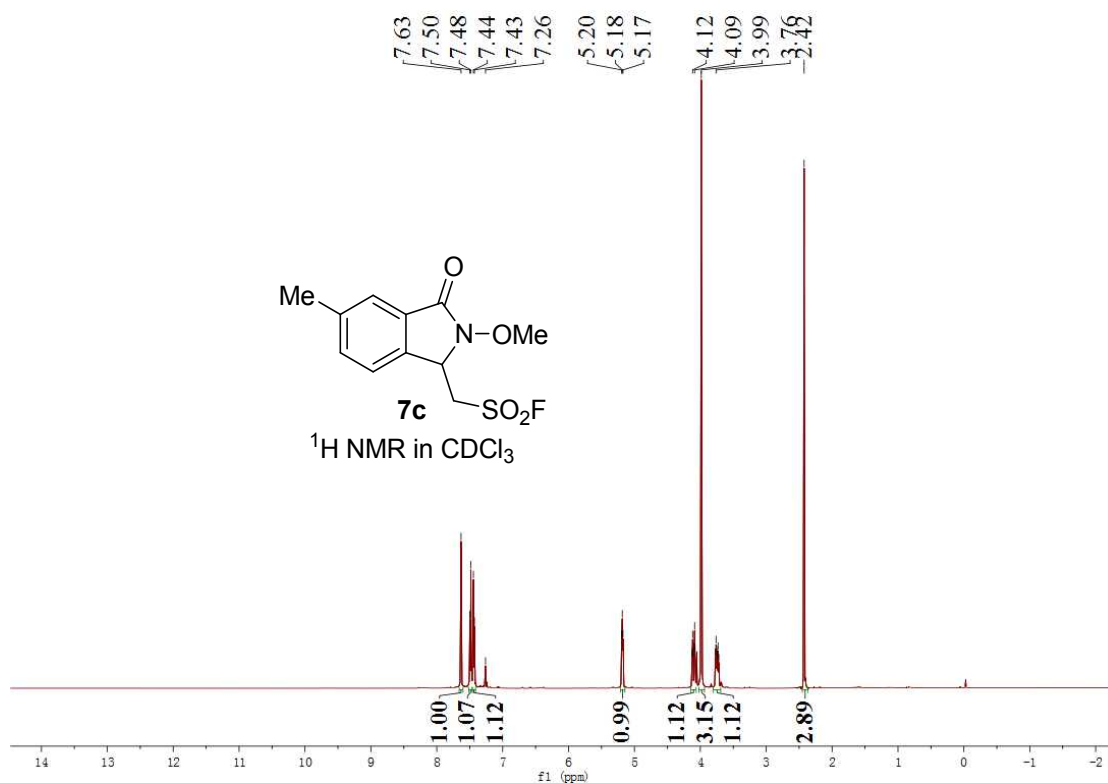



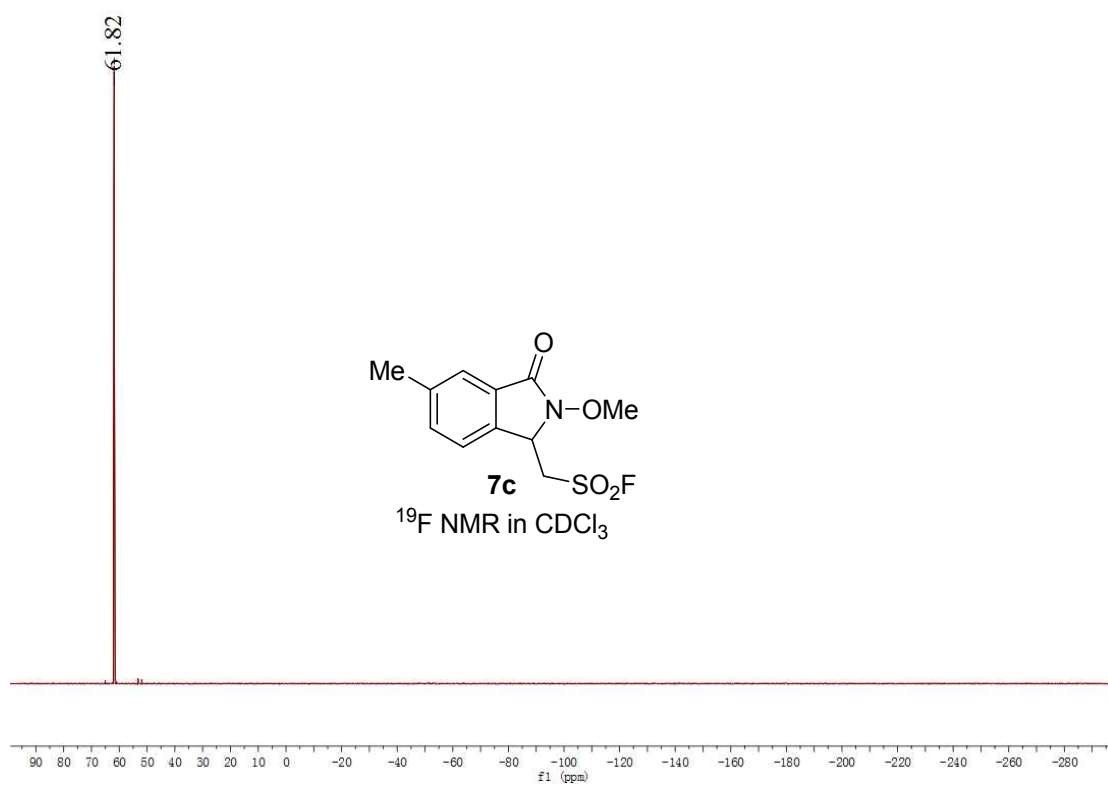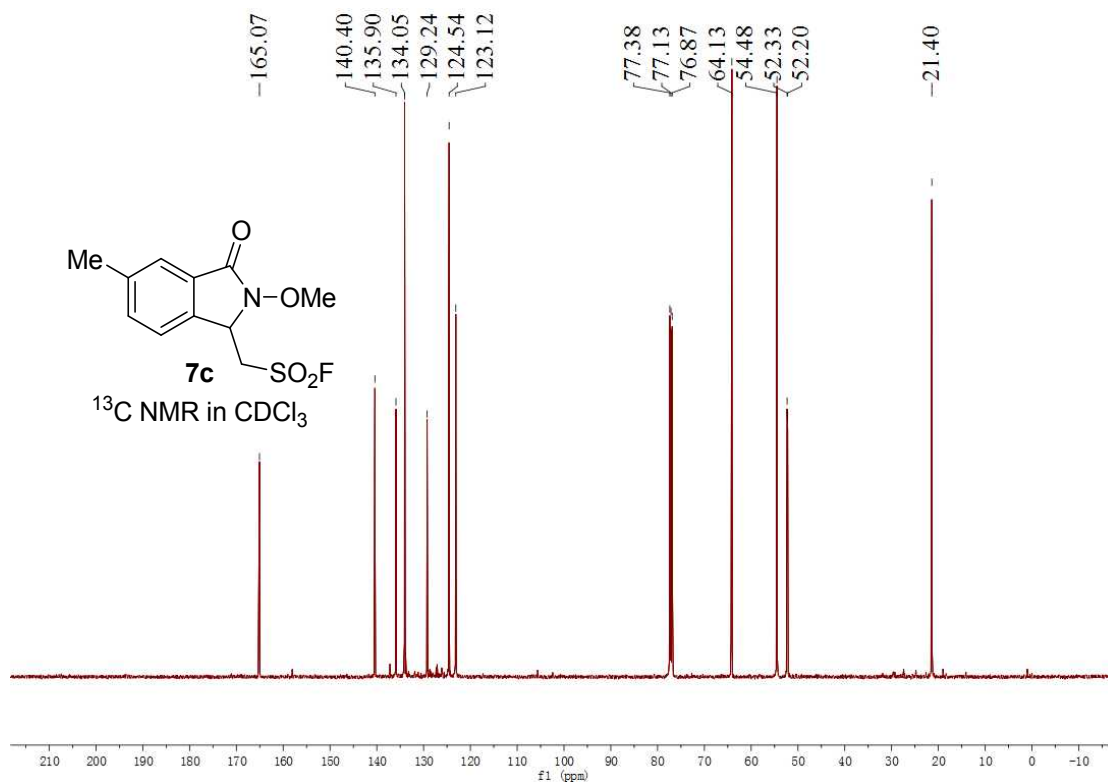

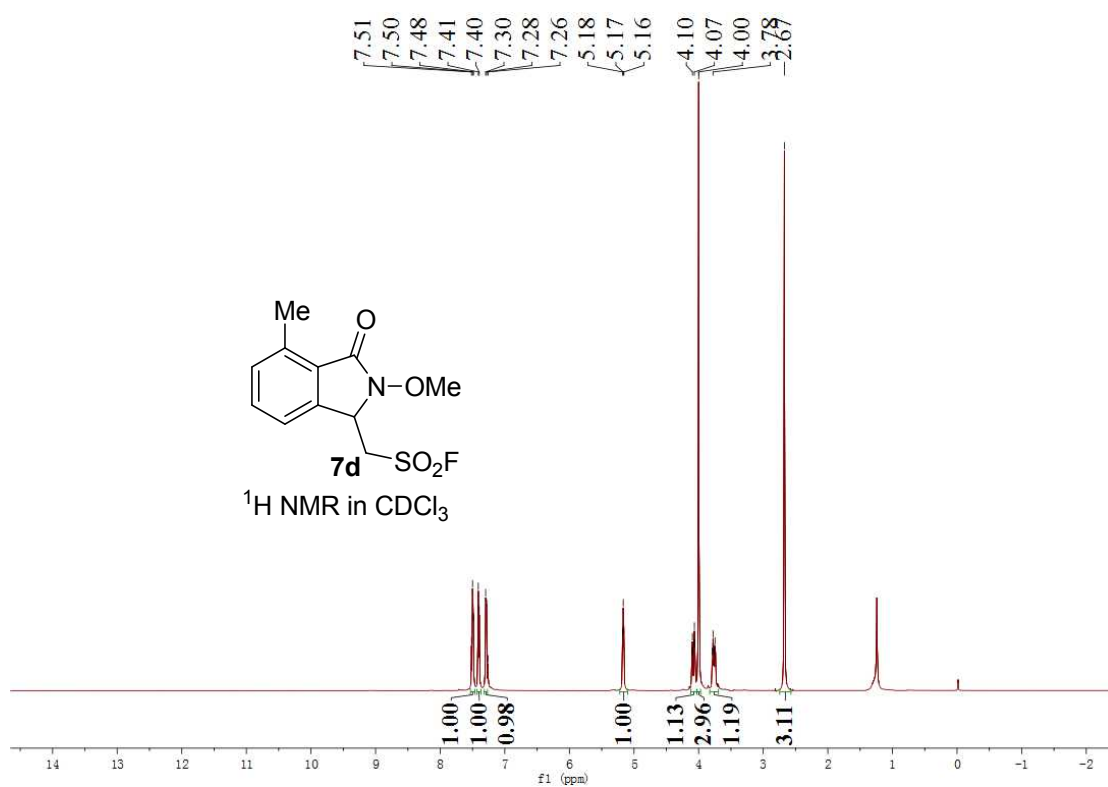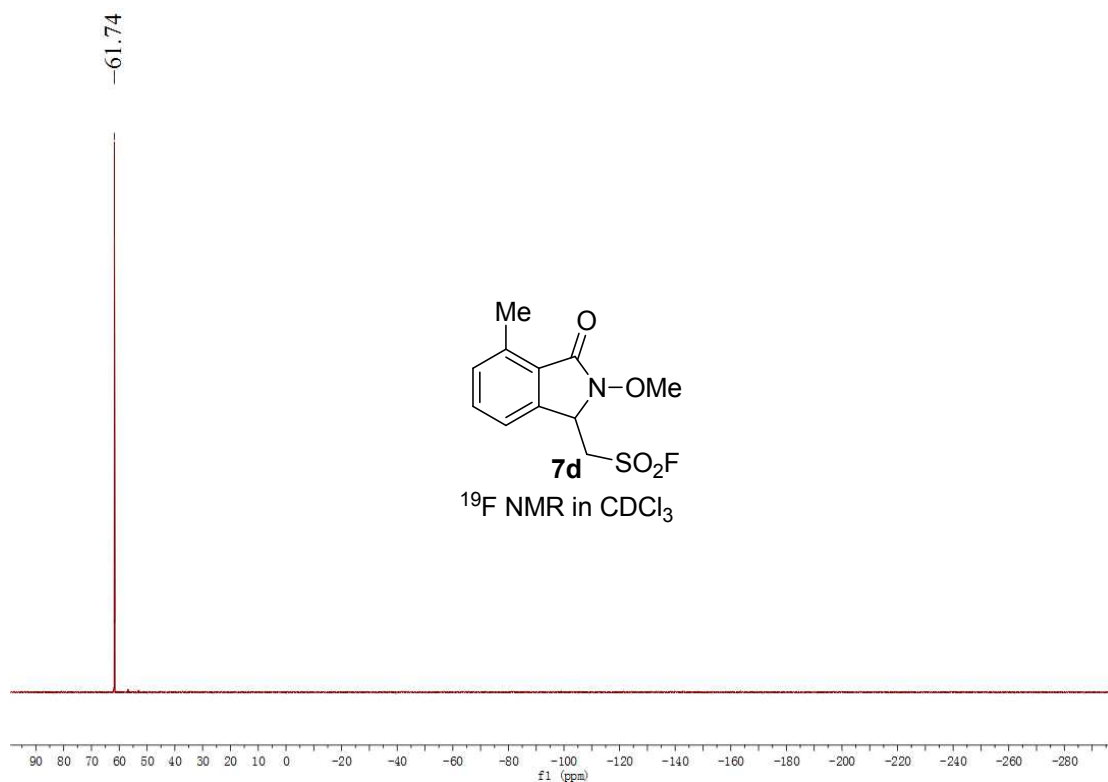

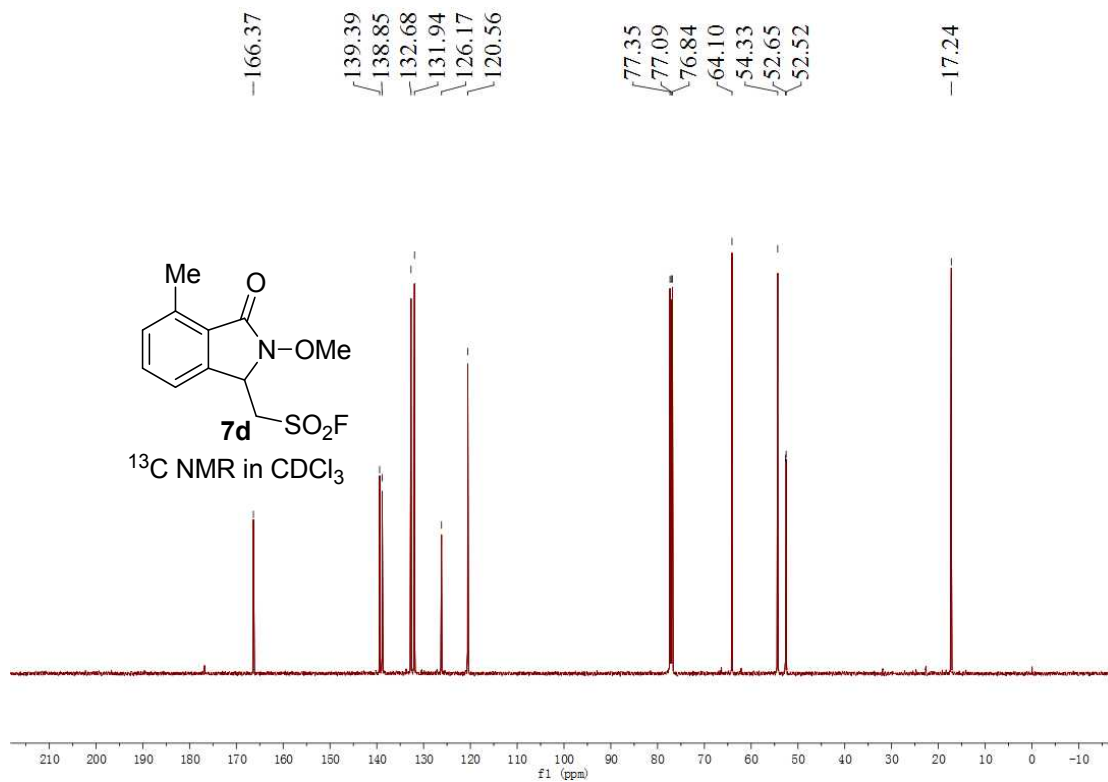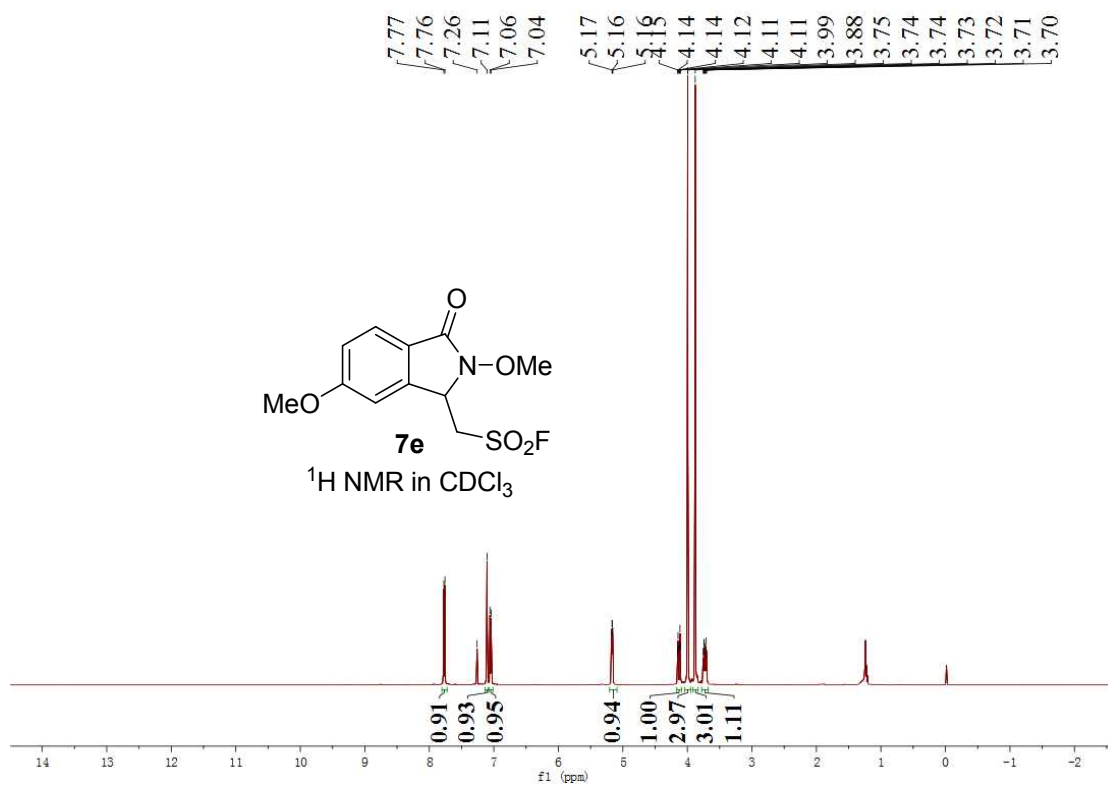

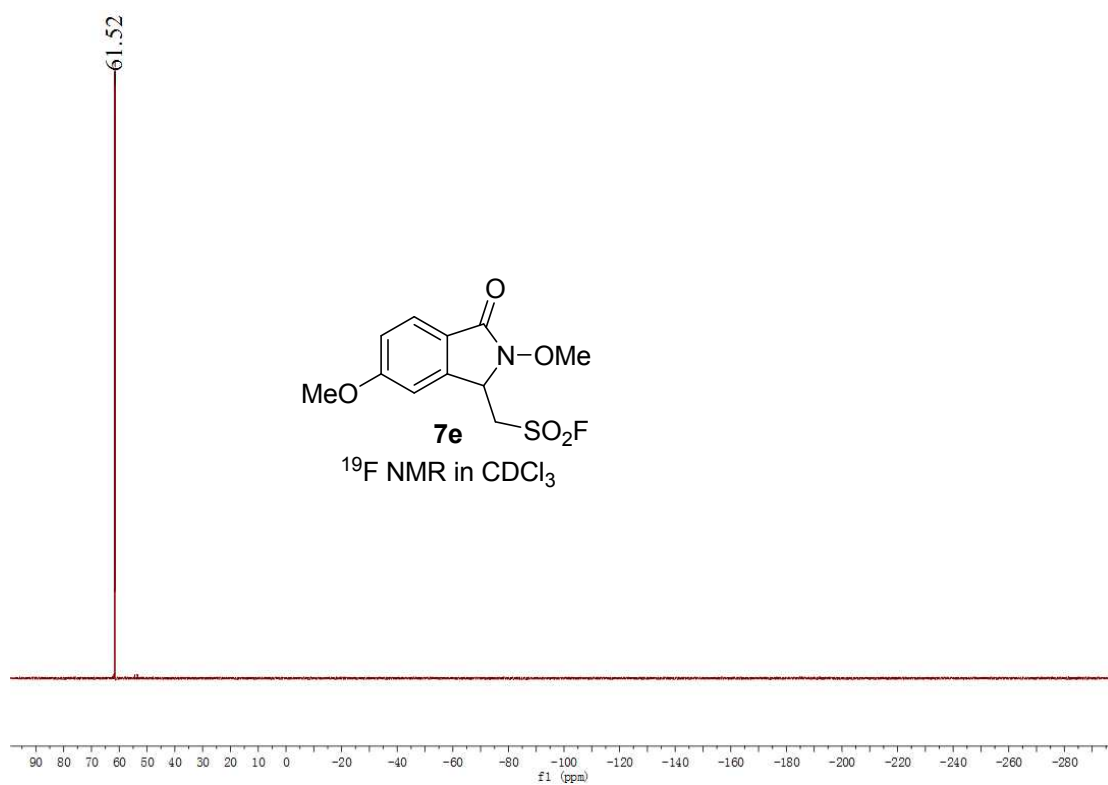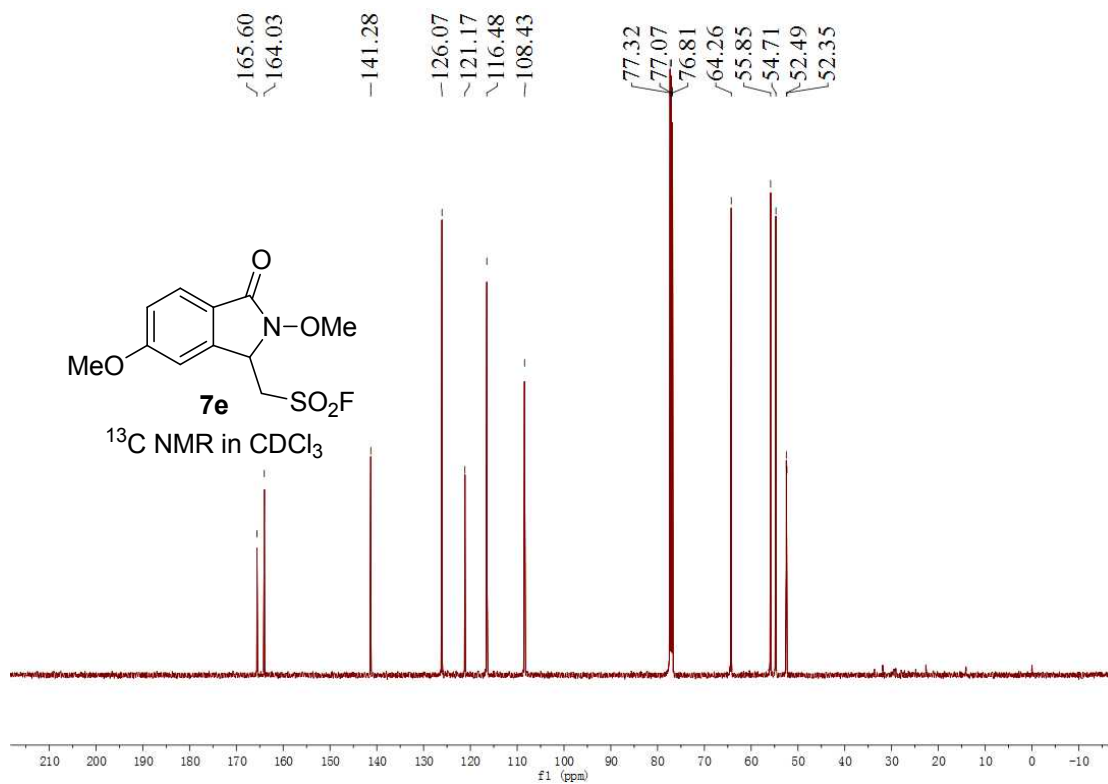

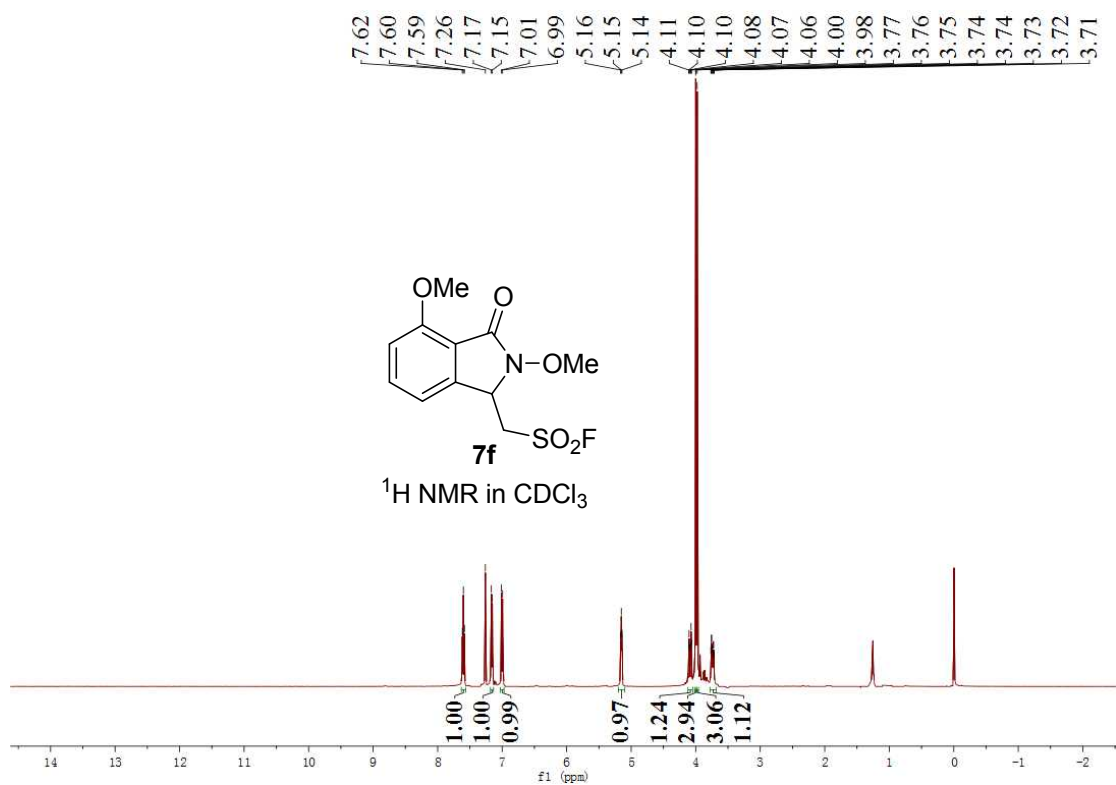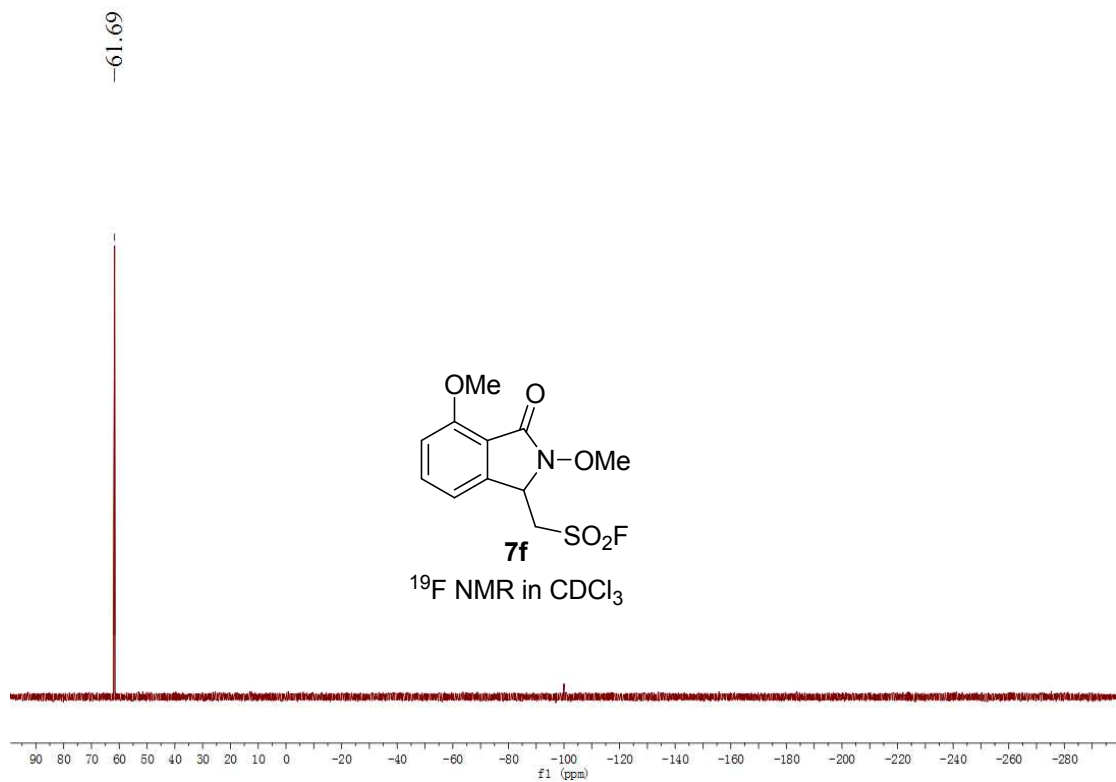

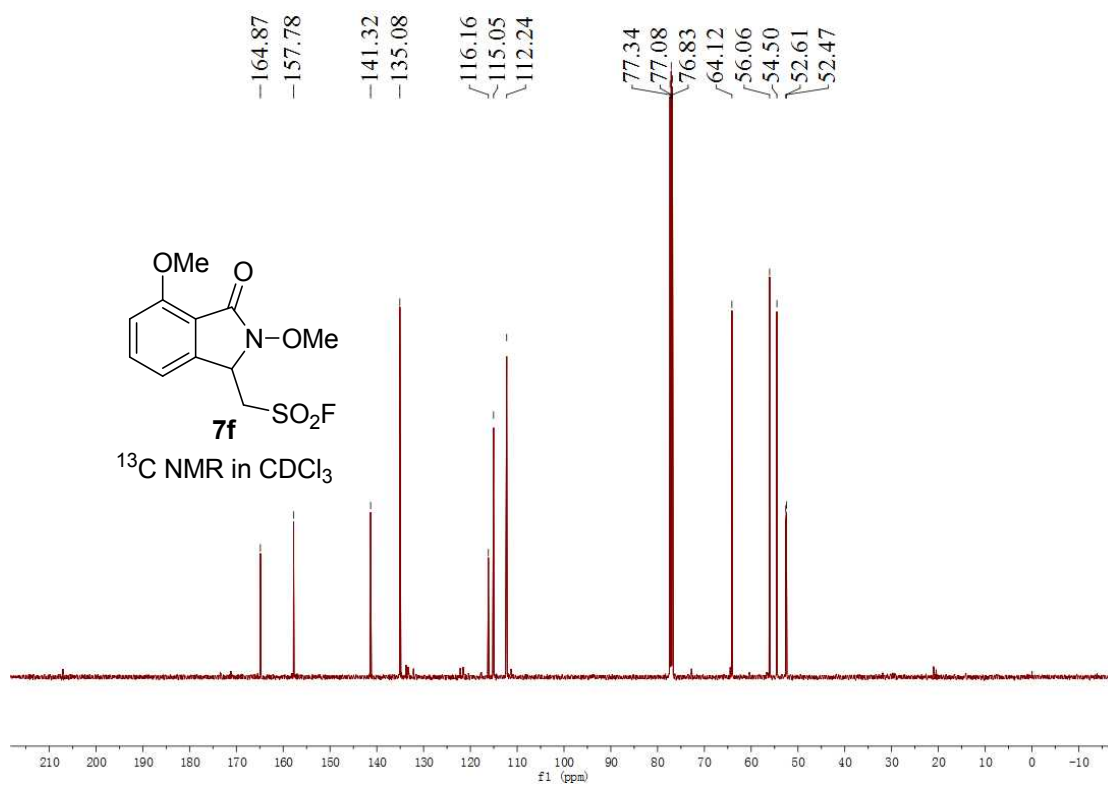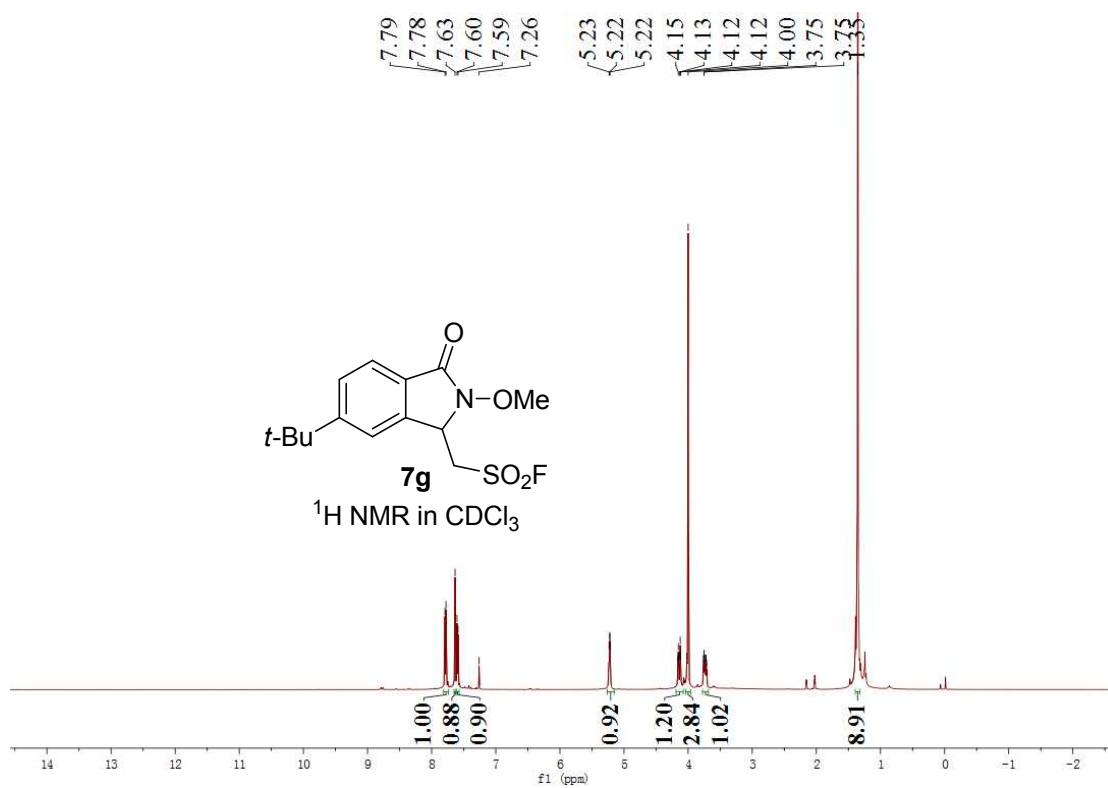

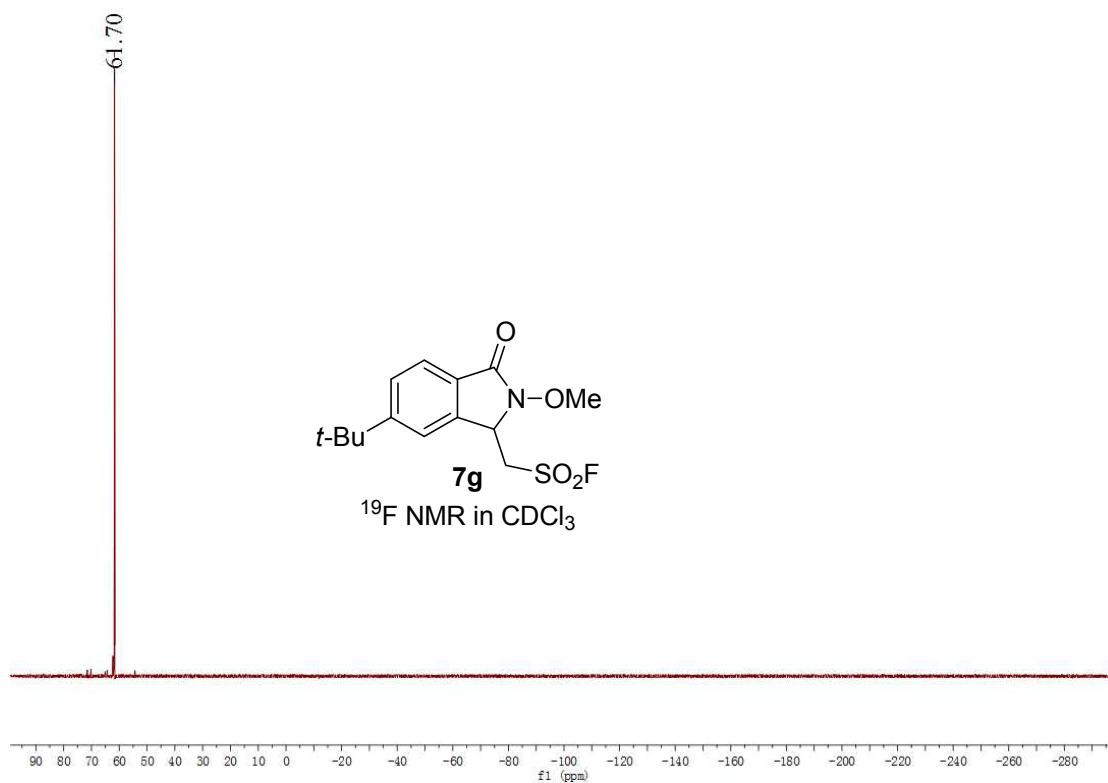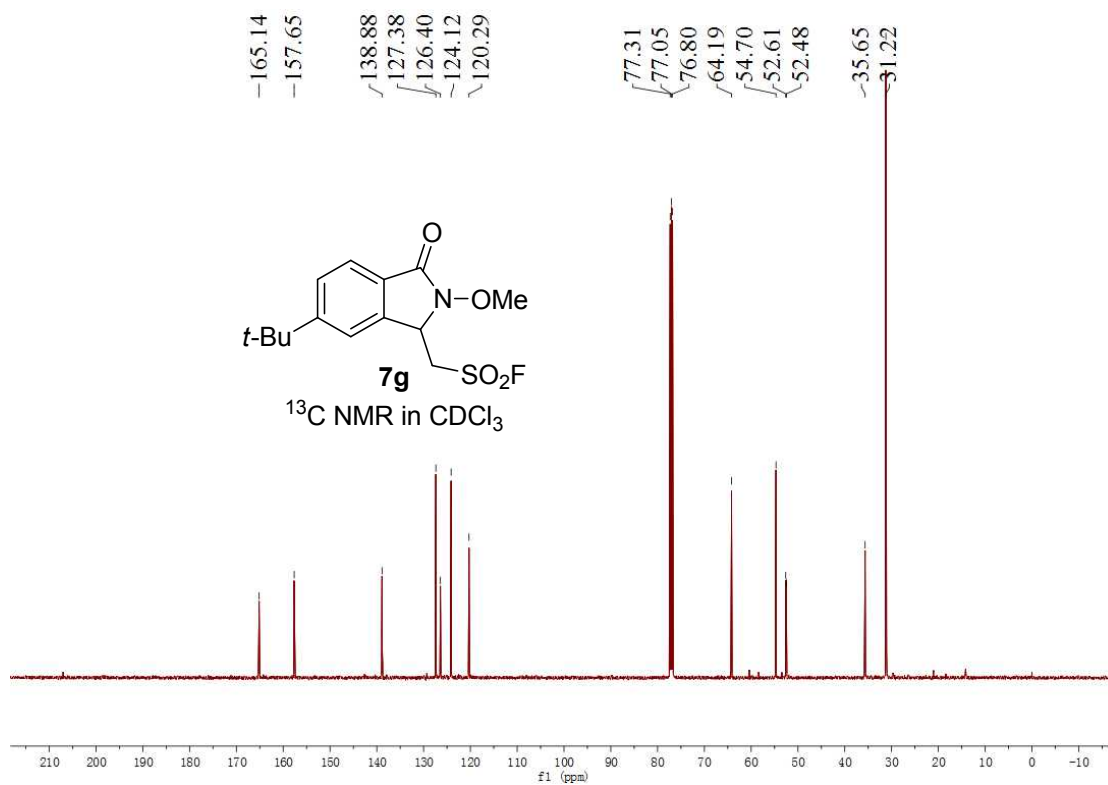

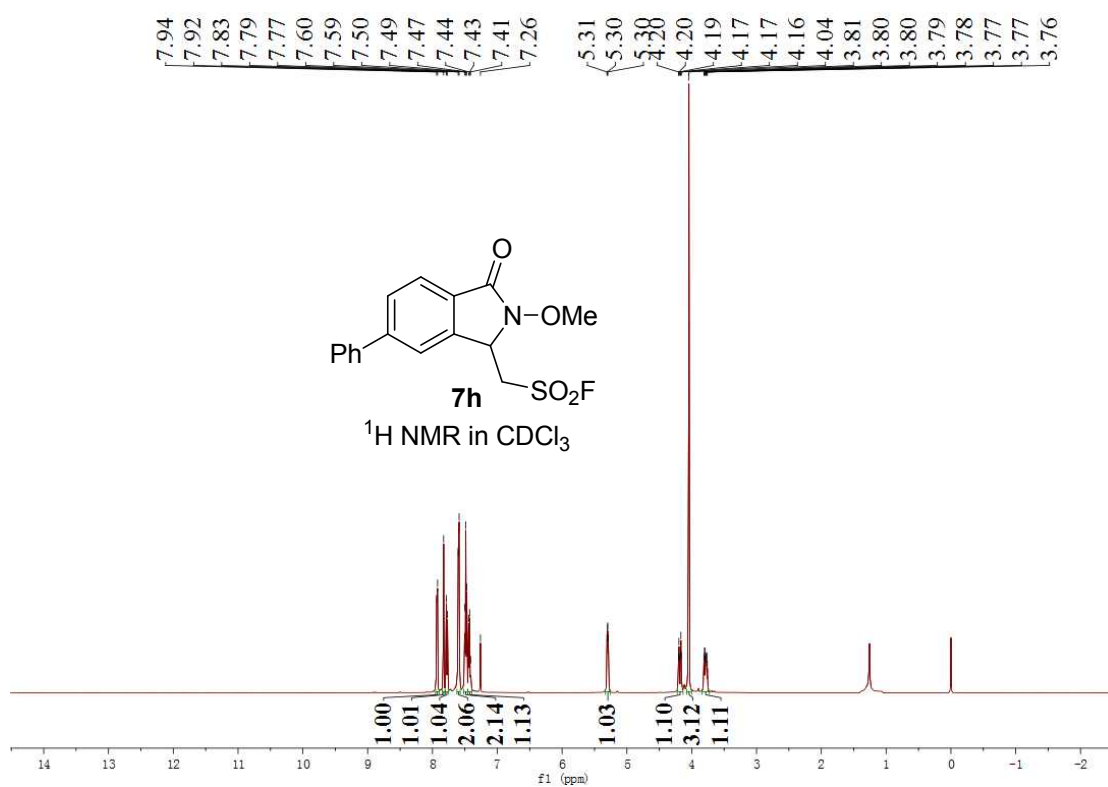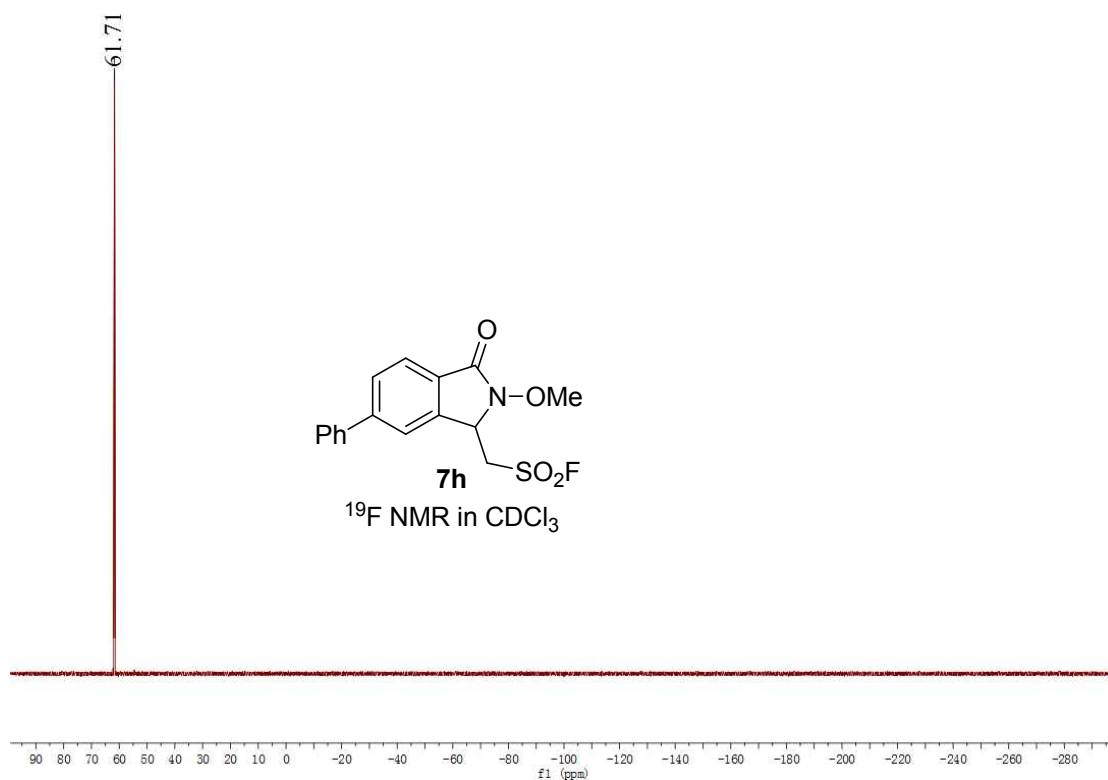



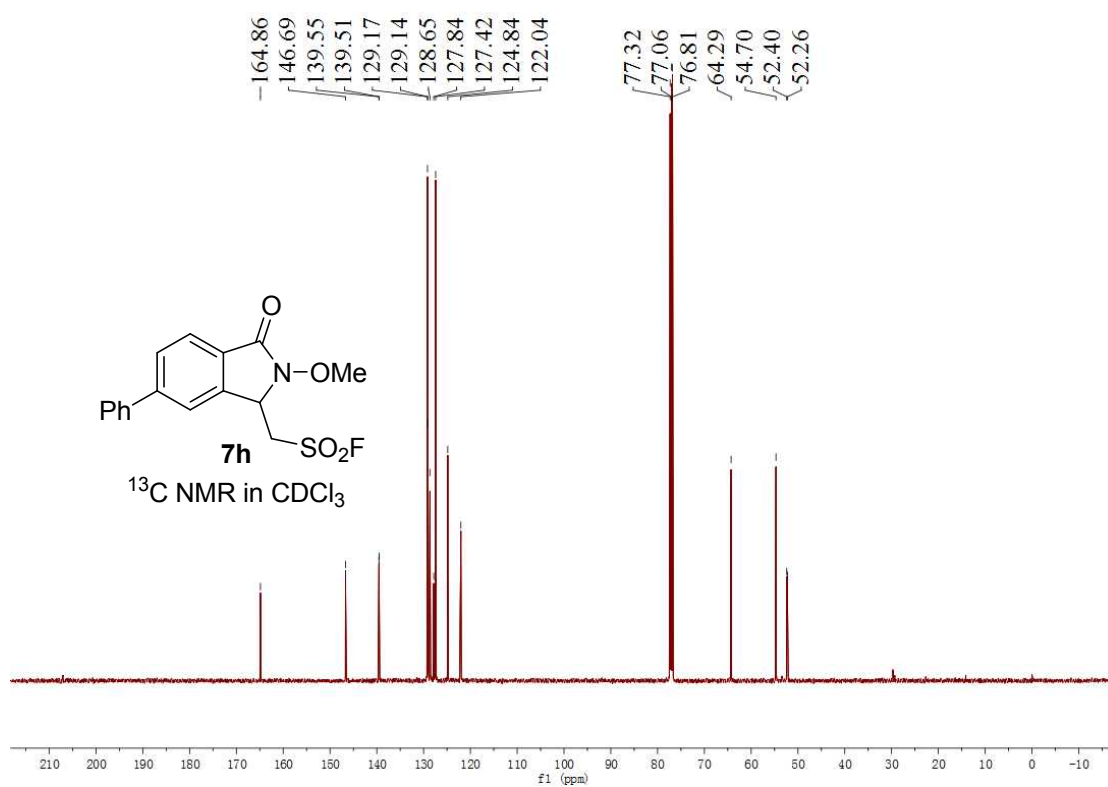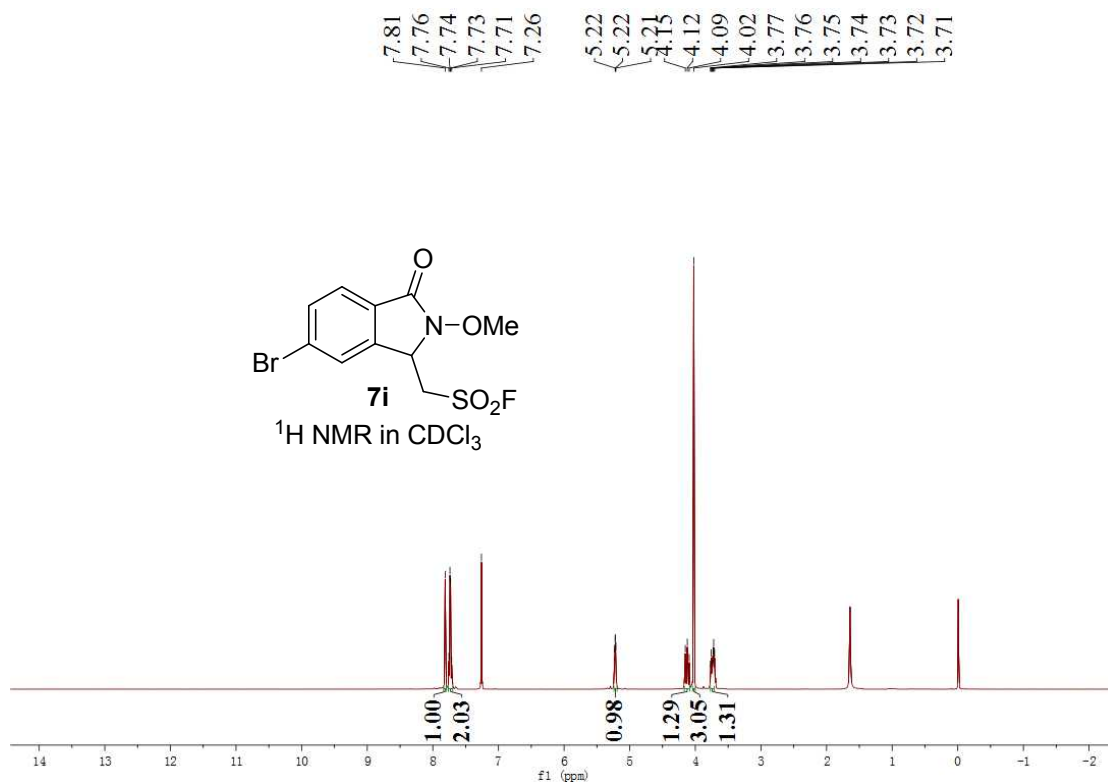

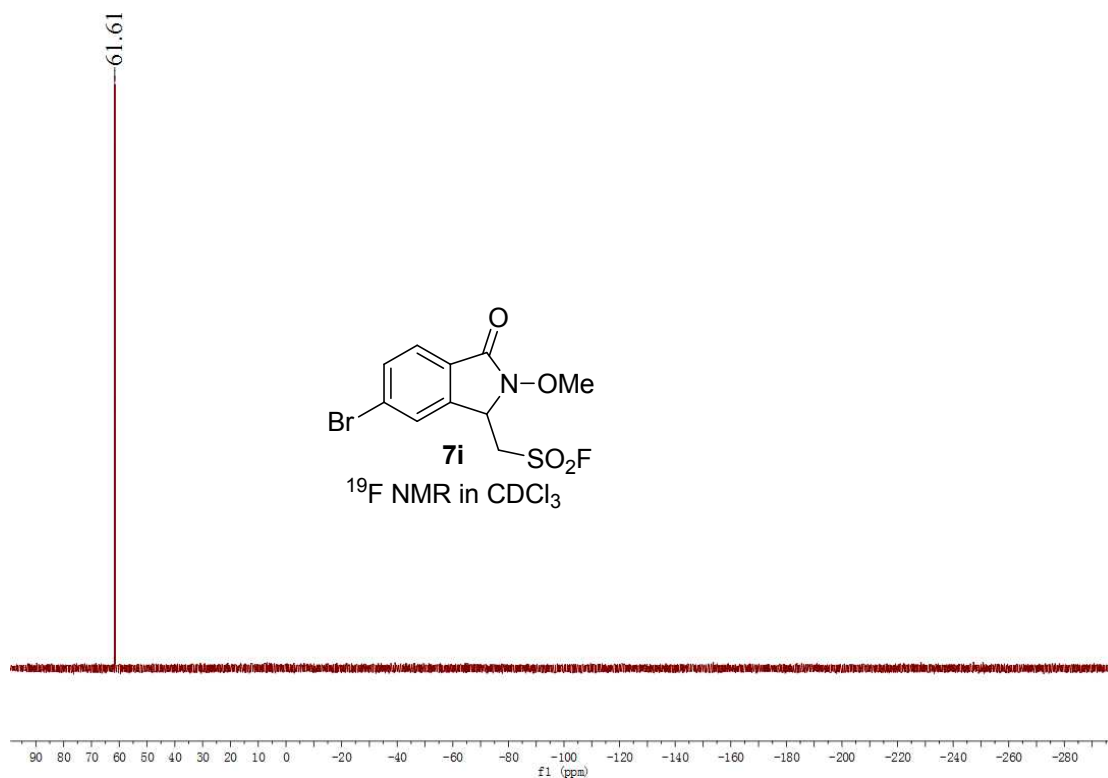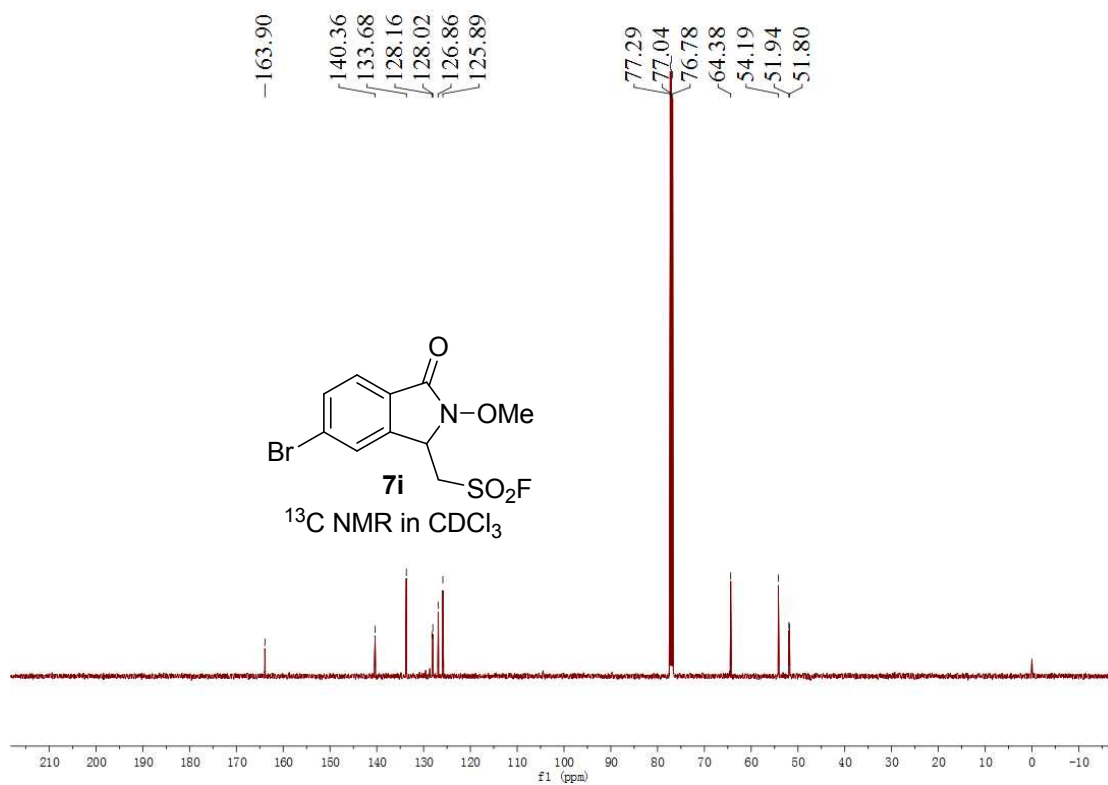

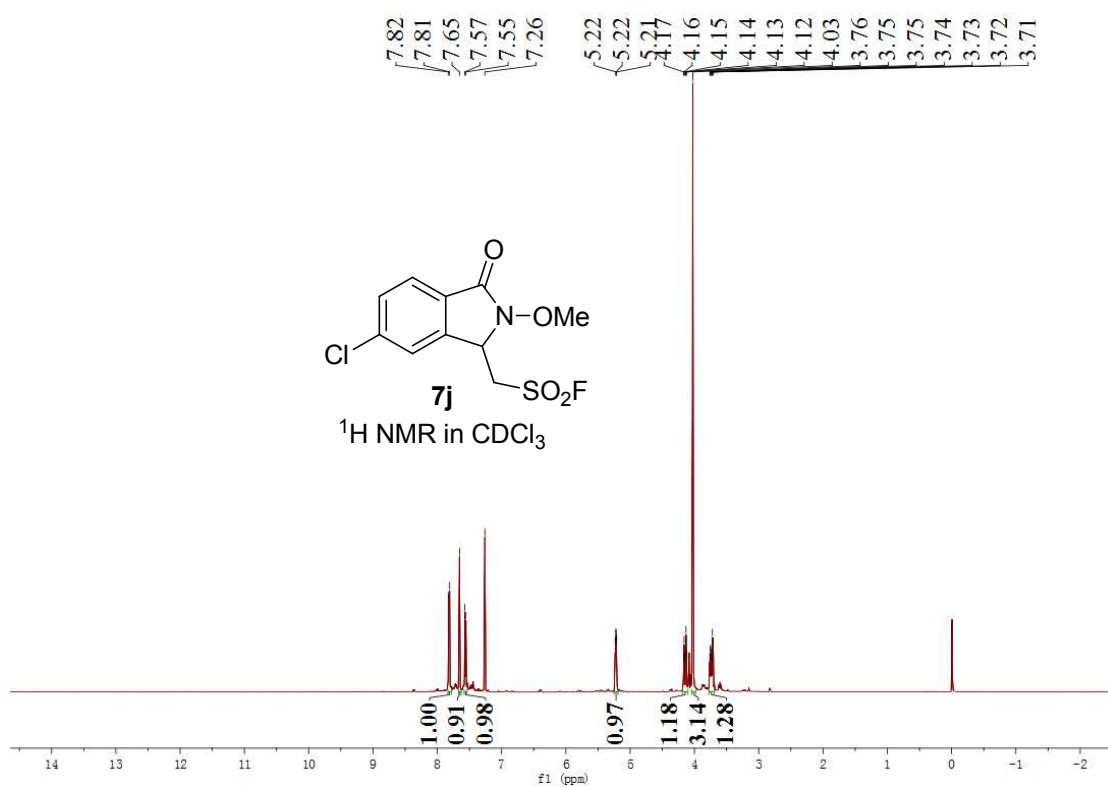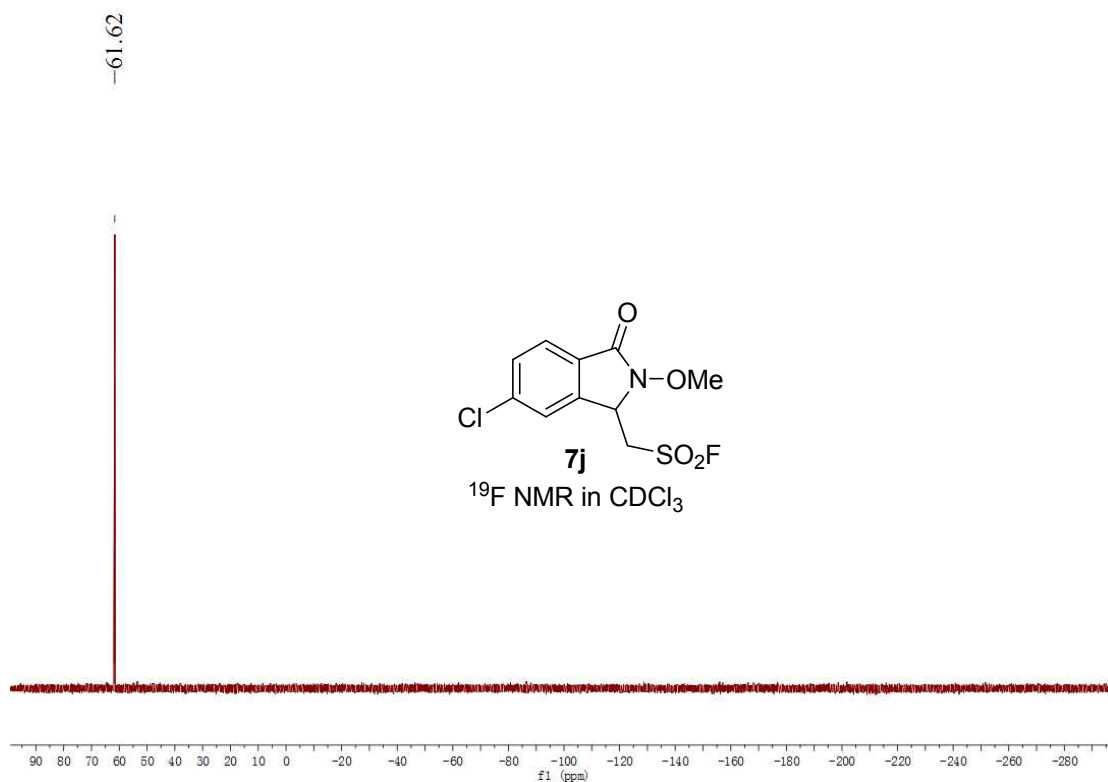

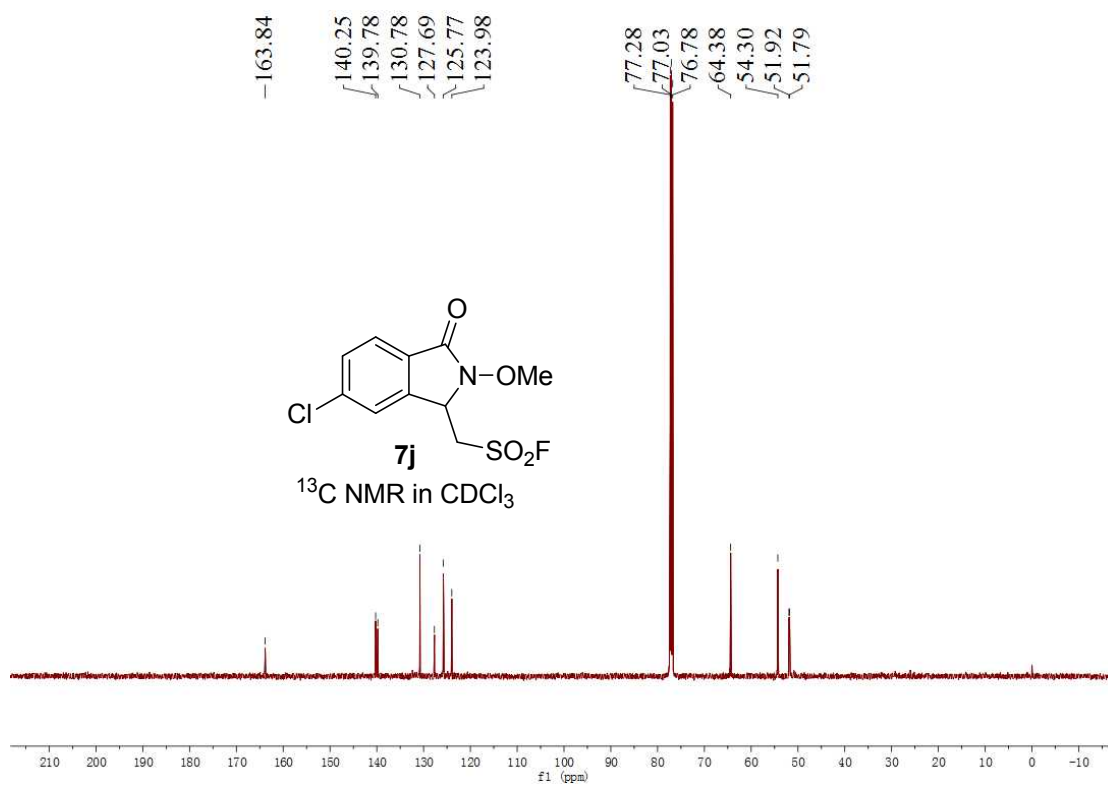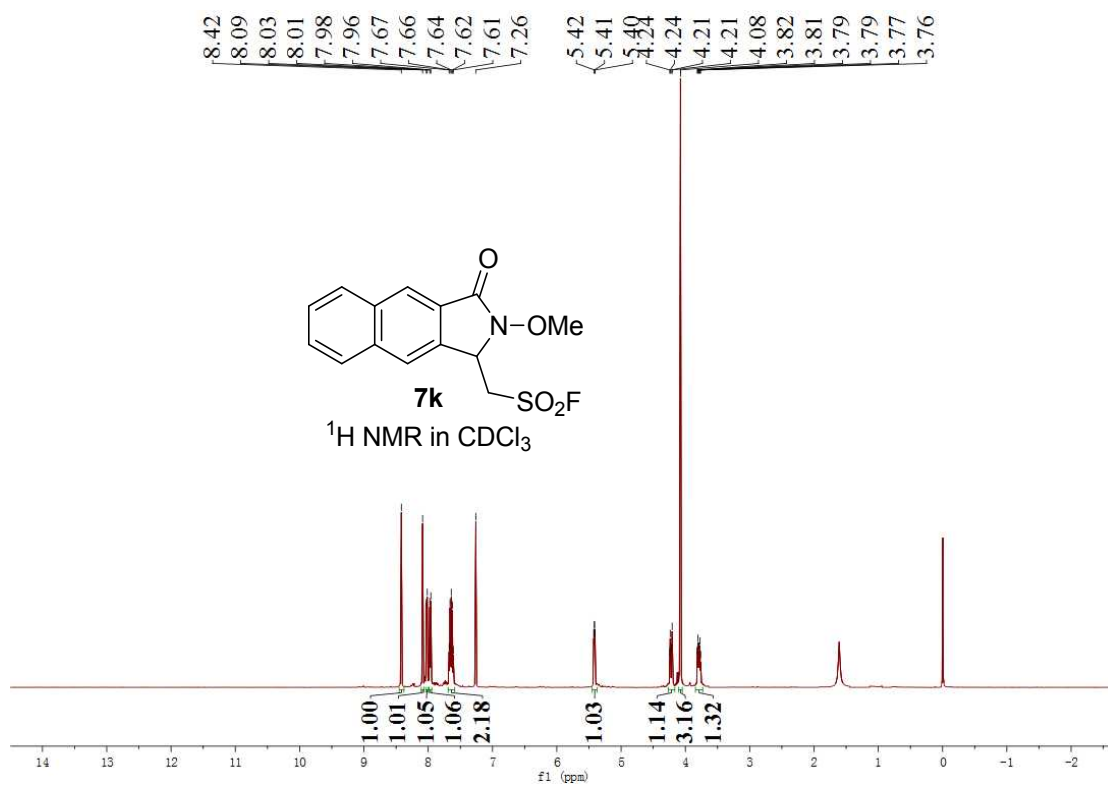

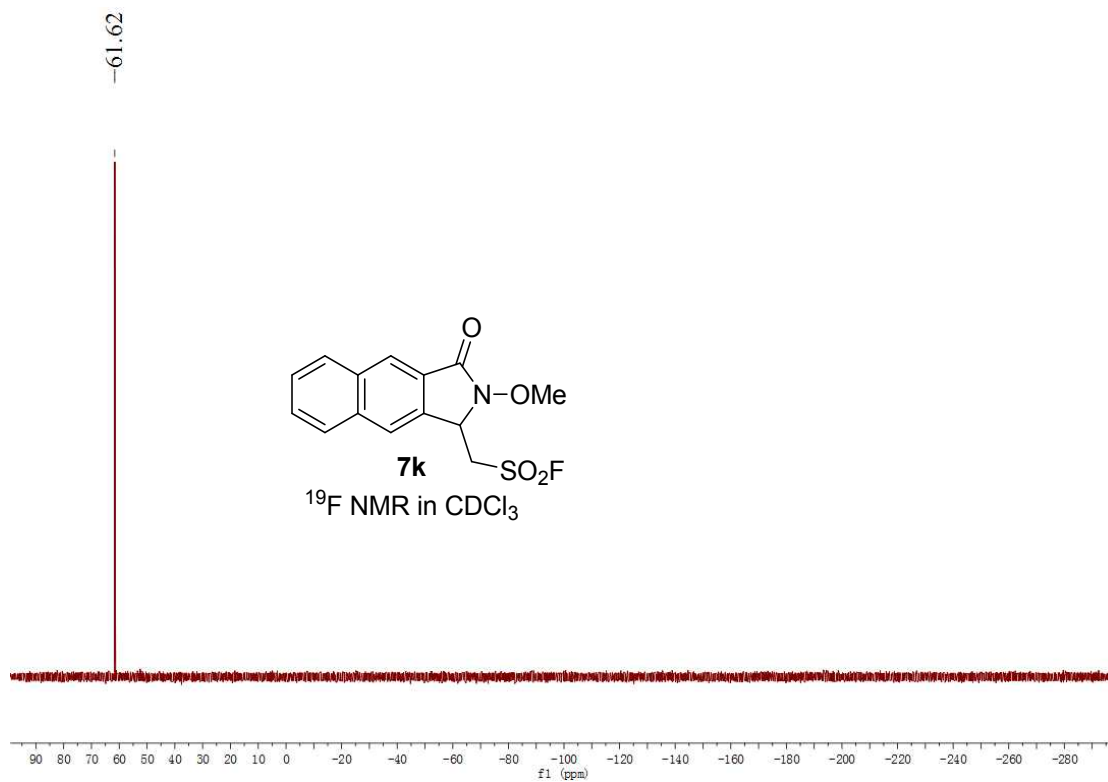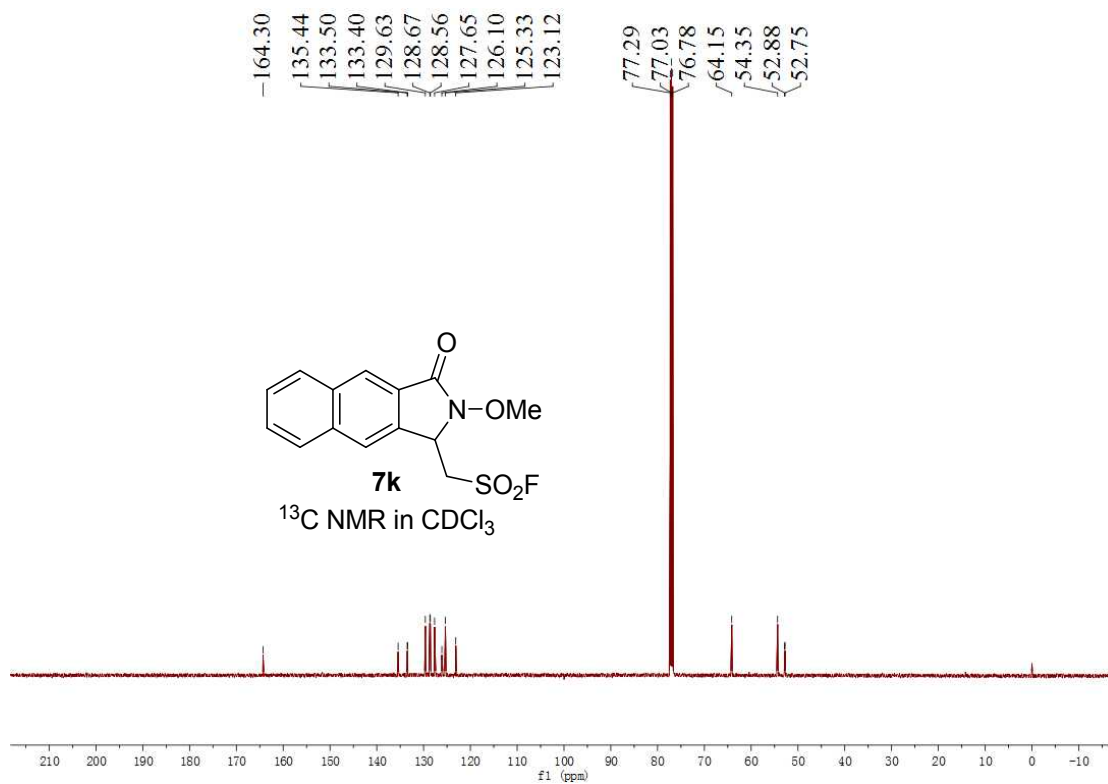

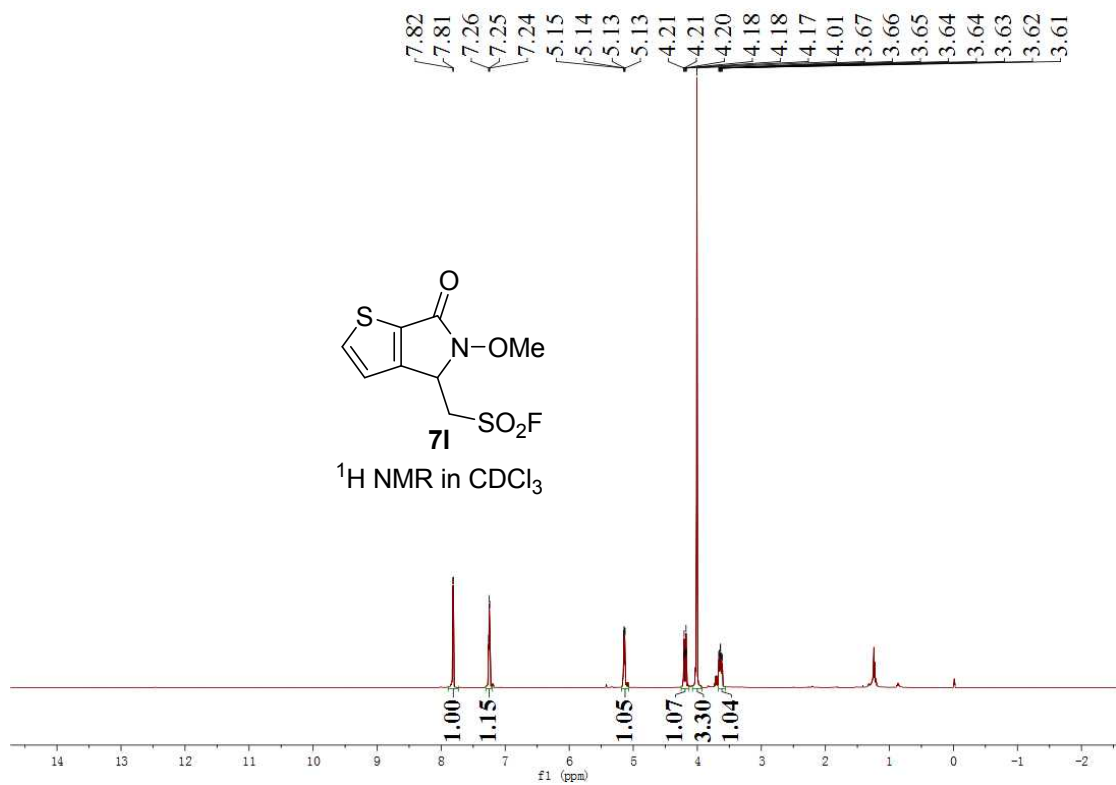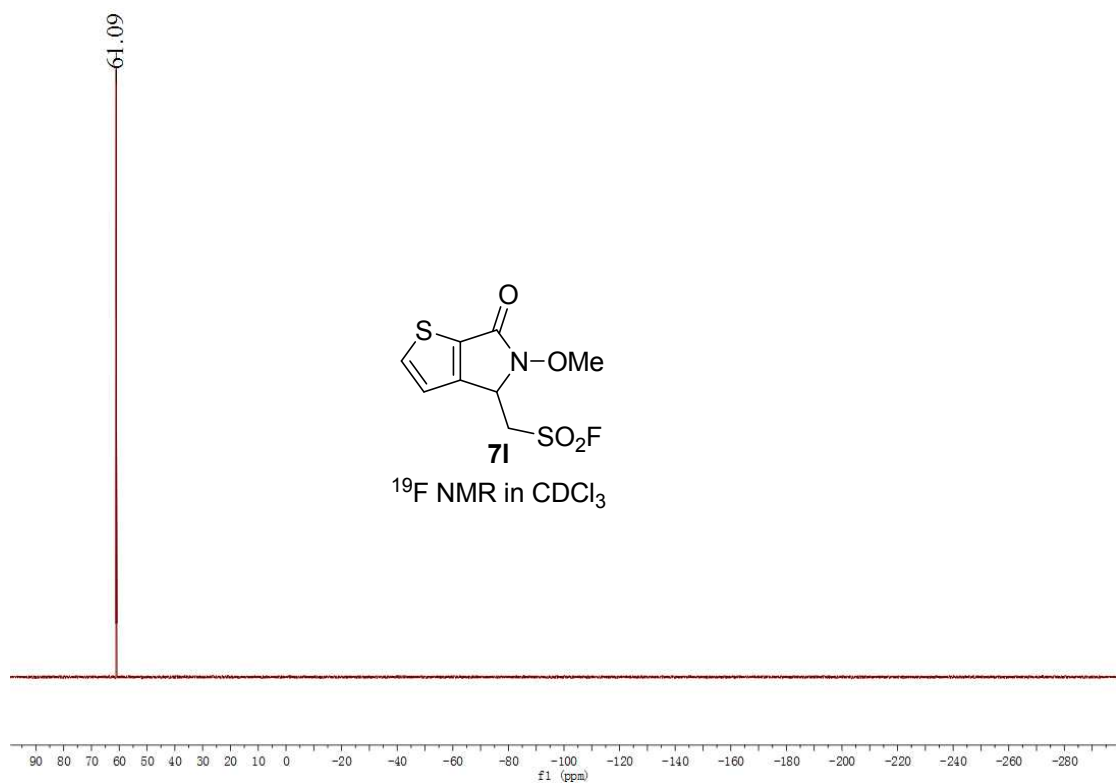

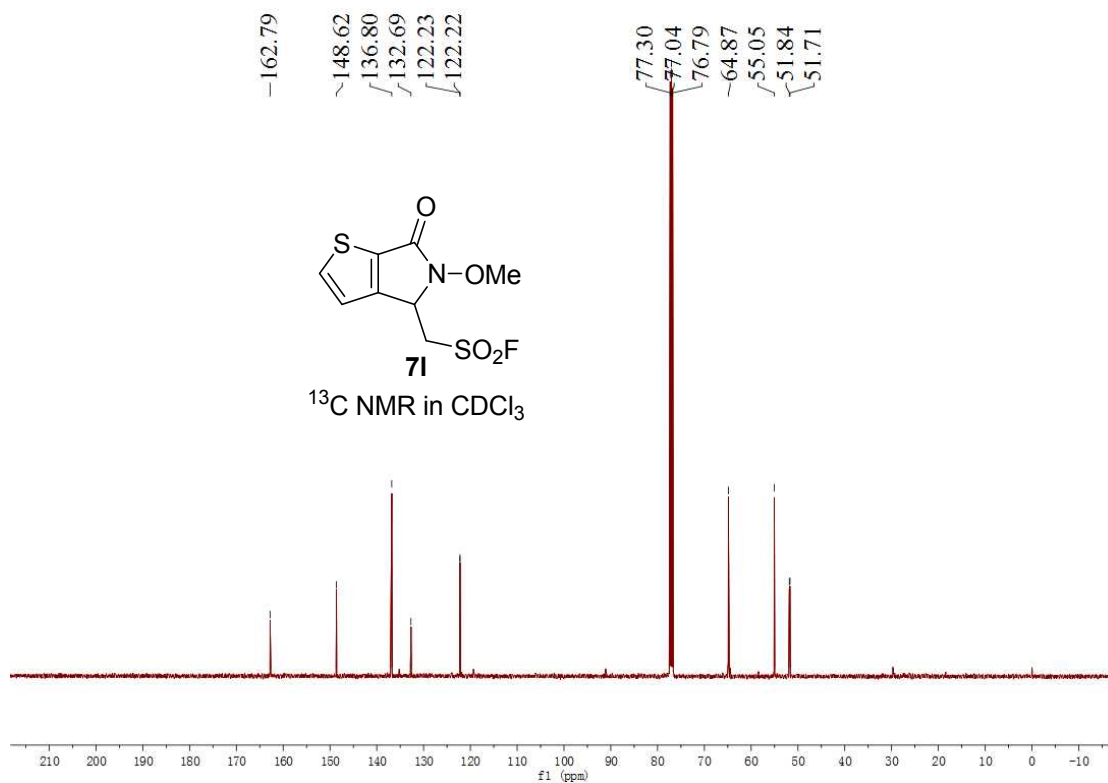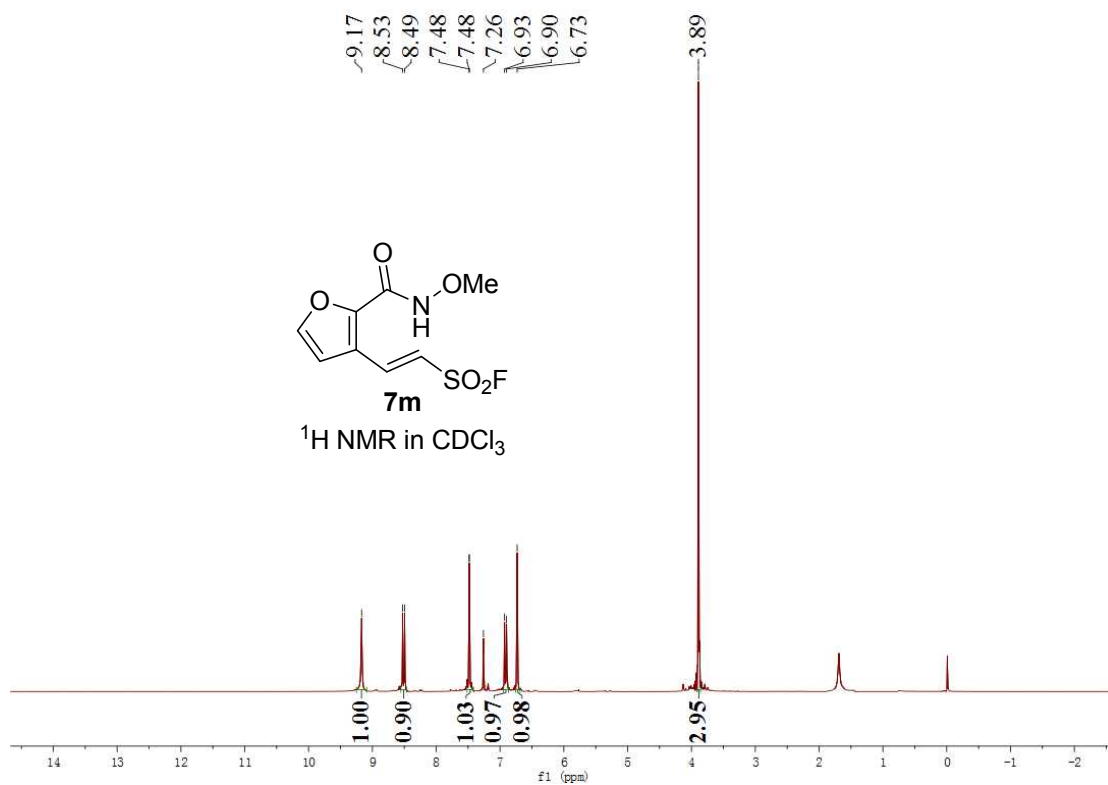

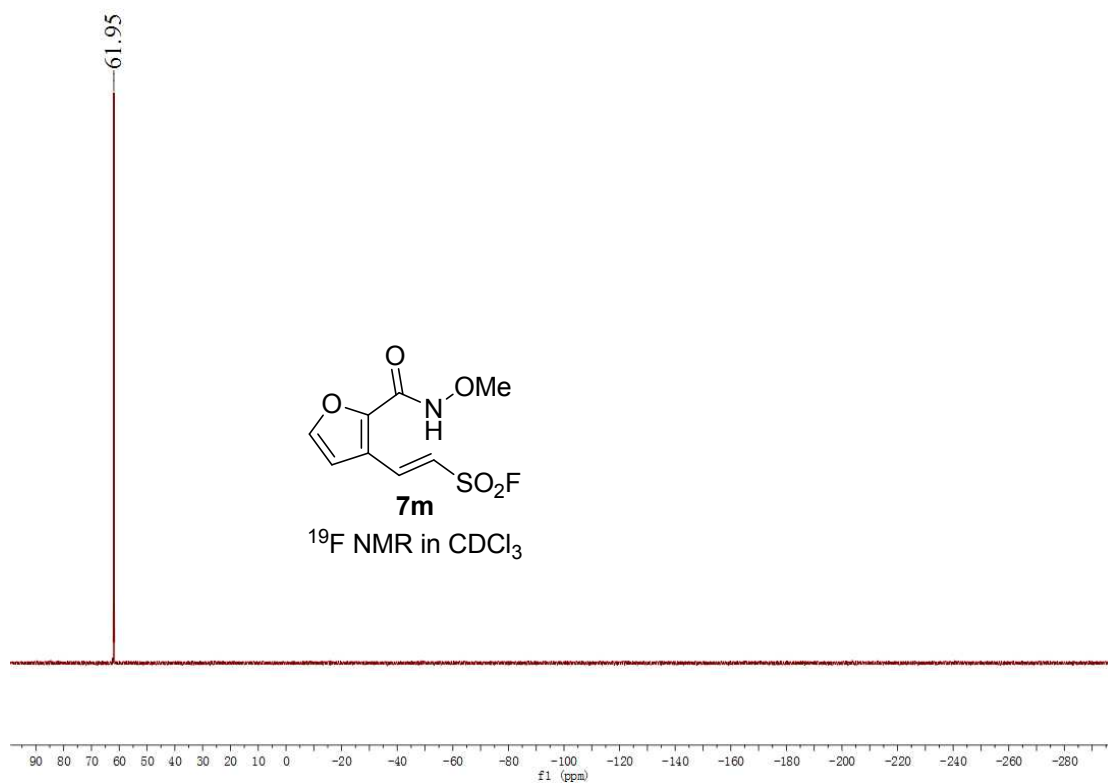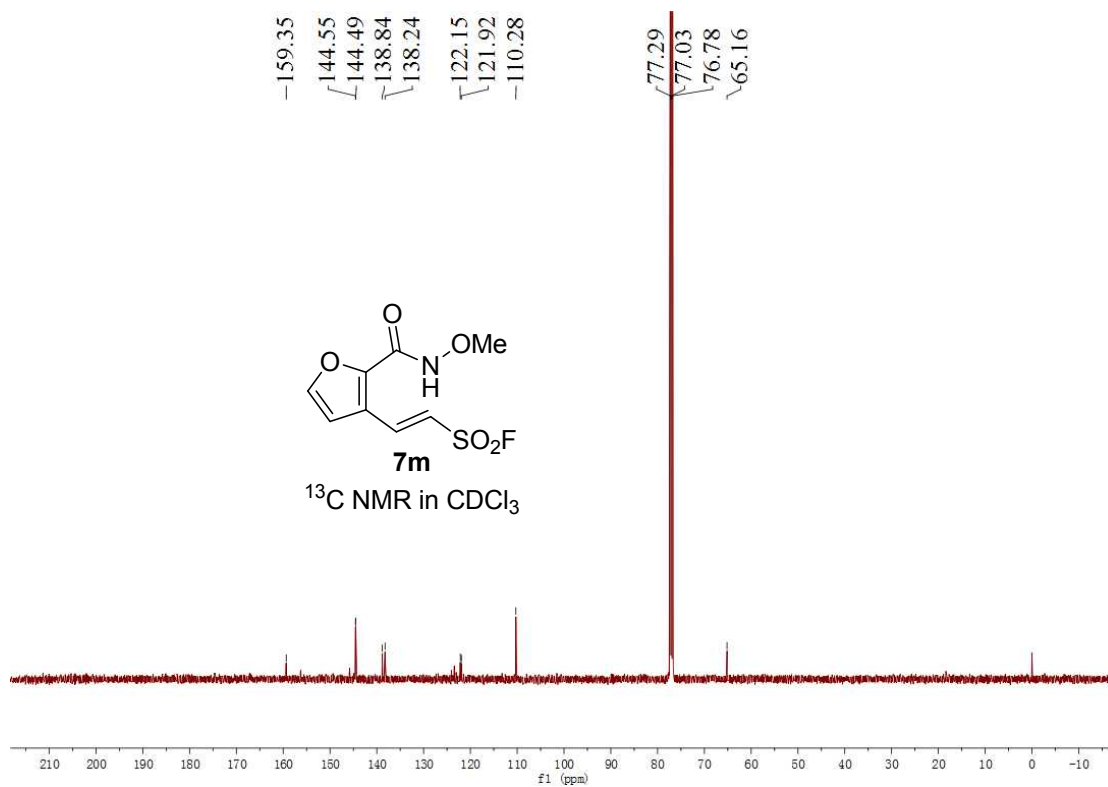



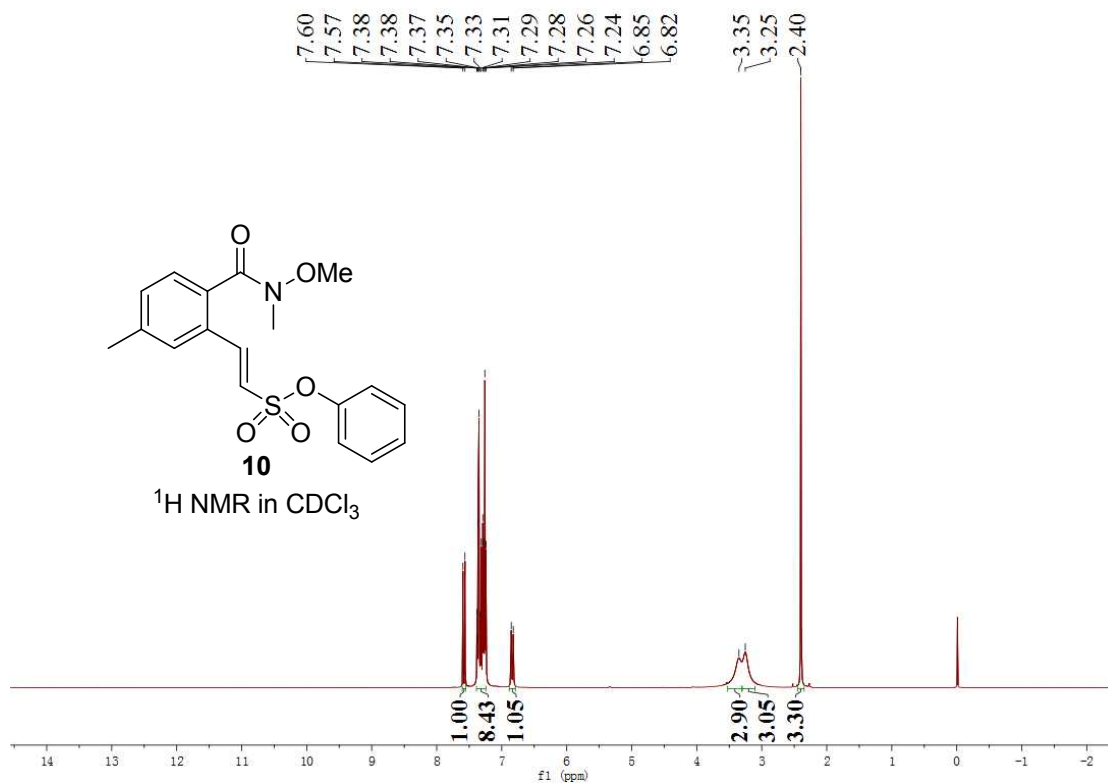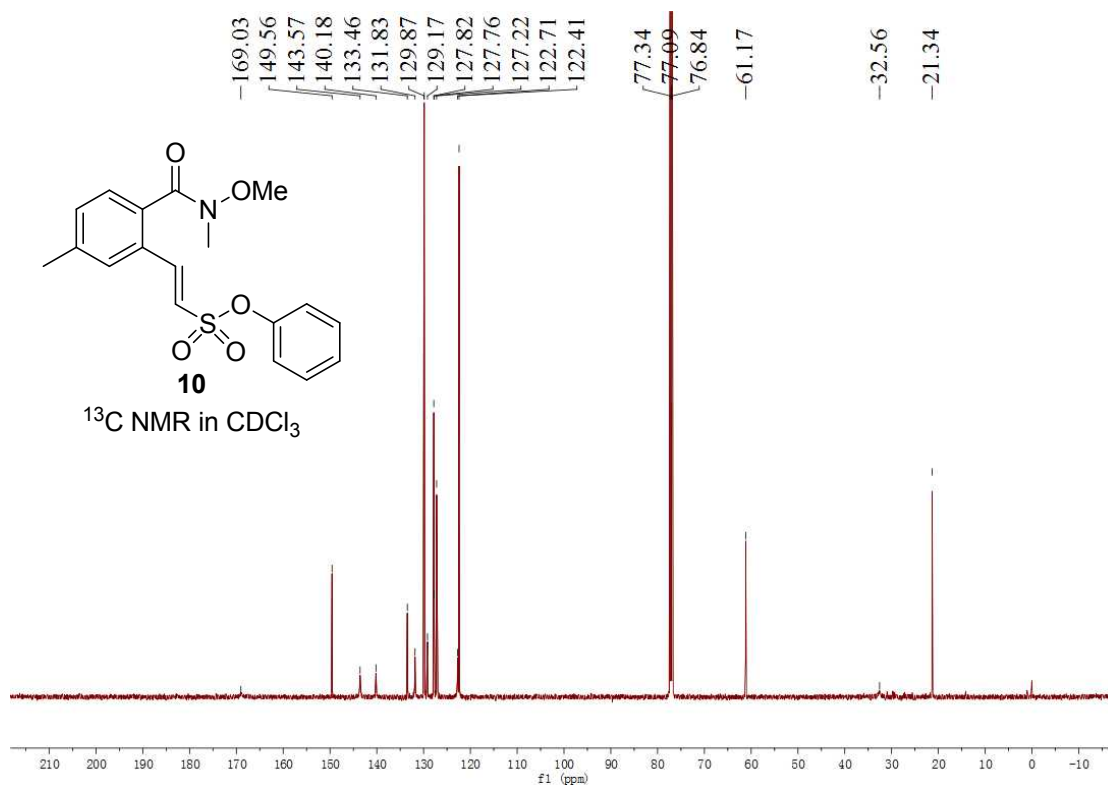

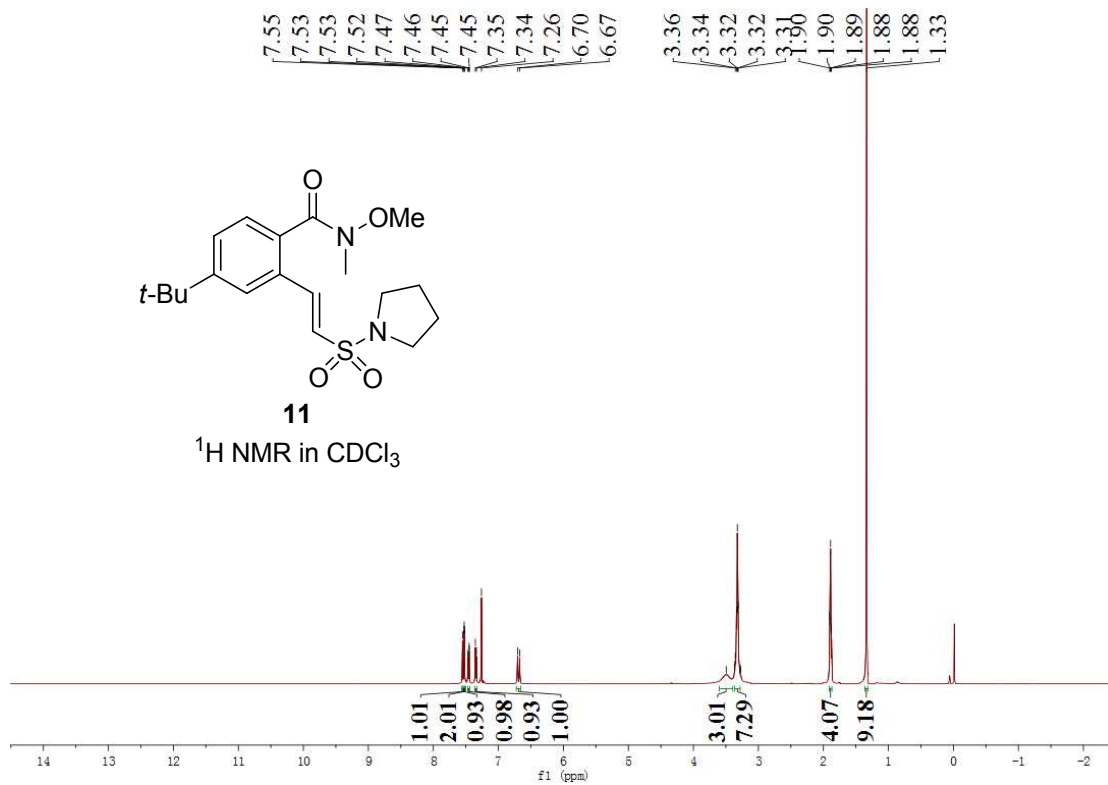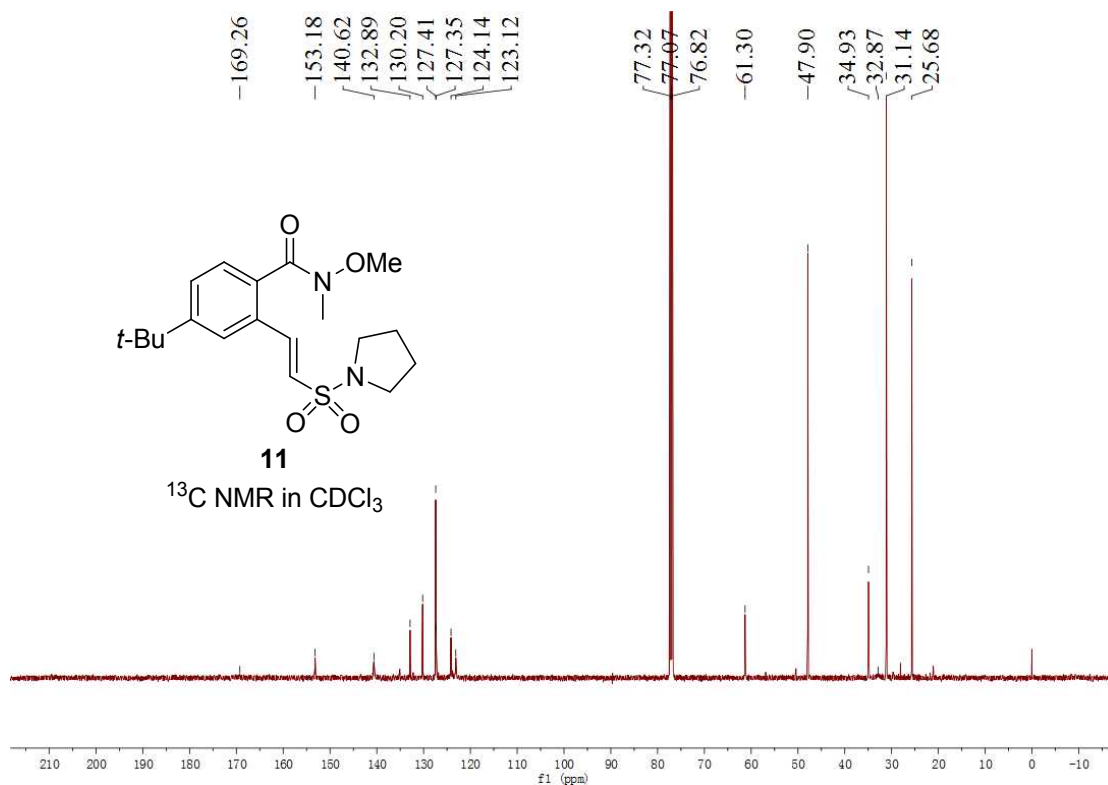

## 9. Data of crystal structures

### 9.1 Data of crystal structure for **5c**.

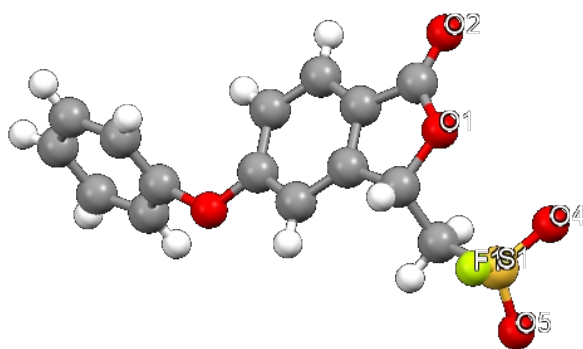

Table 1. Crystal data and structure refinement for 170906f.

|                             |                                                                                   |
|-----------------------------|-----------------------------------------------------------------------------------|
| Identification code         | 170906f                                                                           |
| Empirical formula           | C <sub>15</sub> H <sub>11</sub> F O <sub>5</sub> S                                |
| Formula weight              | 322.30                                                                            |
| Temperature                 | 298(2) K                                                                          |
| Wavelength                  | 0.71073 Å                                                                         |
| Crystal system, space group | Monoclinic, P2(1)/n                                                               |
| Unit cell dimensions        | a = 8.6492(9) Å    alpha = 90 deg.<br>b = 6.7929(8) Å    beta =<br>98.112(2) deg. |

|                                 |                                                           |               |
|---------------------------------|-----------------------------------------------------------|---------------|
| deg.                            | $c = 25.645(3) \text{ \AA}$                               | $\gamma = 90$ |
| Volume                          | 1491.7(3) $\text{\AA}^3$                                  |               |
| Z, Calculated density           | 4, 1.435 $\text{Mg/m}^3$                                  |               |
| Absorption coefficient          | 0.248 $\text{mm}^{-1}$                                    |               |
| F(000)                          | 664                                                       |               |
| Crystal size                    | 0.42 x 0.40 x 0.35 mm                                     |               |
| Theta range for data collection | 3.10 to 25.02 deg.                                        |               |
| Limiting indices                | $-10 \leq h \leq 10, -8 \leq k \leq 8, -5 \leq l \leq 30$ |               |
| Reflections collected / unique  | 2570 / 2570 [R(int) = 0.0000]                             |               |
| Completeness to theta = 25.02   | 98.1 %                                                    |               |
| Absorption correction           | Semi-empirical from equivalents                           |               |
| Max. and min. transmission      | 0.9182 and 0.9029                                         |               |

|                                      |                                       |
|--------------------------------------|---------------------------------------|
| Refinement method                    | Full-matrix least-squares on $F^2$    |
| Data / restraints / parameters       | 2570 / 0 / 200                        |
| Goodness-of-fit on $F^2$             | 1.053                                 |
| Final R indices [ $I > 2\sigma(I)$ ] | R1 = 0.0813, wR2 = 0.2160             |
| R indices (all data)                 | R1 = 0.1039, wR2 = 0.2291             |
| Largest diff. peak and hole          | 0.351 and -0.398 e. $\text{\AA}^{-3}$ |

Table 2. Atomic coordinates ( $\times 10^4$ ) and equivalent isotropic displacement parameters ( $\text{Å}^2 \times 10^3$ ) for 170906f.

U(eq) is defined as one third of the trace of the orthogonalized Uij tensor.

---

|       | x       | y        | z        |        |
|-------|---------|----------|----------|--------|
| U(eq) |         |          |          |        |
| <hr/> |         |          |          |        |
| O(4)  | 7330(6) | 7871(9)  | 11016(2) | 100(2) |
| O(1)  | 7415(4) | 9537(5)  | 9913(1)  | 53(1)  |
| O(2)  | 8862(4) | 12054(5) | 9697(2)  | 61(1)  |
| O(3)  | 8863(7) | 4339(6)  | 8199(2)  | 91(2)  |
| F(1)  | 5021(5) | 6488(8)  | 10551(2) | 104(2) |
| O(5)  | 7021(7) | 4405(9)  | 10990(2) | 113(2) |
| S(1)  | 6630(2) | 6233(2)  | 10702(1) | 58(1)  |
| C(1)  | 8385(6) | 10420(7) | 9599(2)  | 46(1)  |
| C(2)  | 8645(5) | 9065(7)  | 9189(2)  | 44(1)  |
| C(3)  | 9538(6) | 9262(8)  | 8782(2)  | 55(1)  |
| C(4)  | 9636(7) | 7730(9)  | 8445(2)  | 61(2)  |

|       |           |          |          |       |
|-------|-----------|----------|----------|-------|
| C(5)  | 8796(7)   | 5988(8)  | 8509(2)  | 59(1) |
| C(6)  | 7901(6)   | 5765(7)  | 8905(2)  | 53(1) |
| C(7)  | 7837(5)   | 7350(7)  | 9243(2)  | 43(1) |
| C(8)  | 7029(6)   | 7553(7)  | 9724(2)  | 45(1) |
| C(9)  | 7619(6)   | 6089(7)  | 10148(2) | 46(1) |
| C(10) | 9485(7)   | 4397(9)  | 7727(2)  | 60(2) |
| C(11) | 8937(8)   | 5588(10) | 7321(3)  | 80(2) |
| C(12) | 9566(11)  | 5472(12) | 6850(3)  | 91(2) |
| C(13) | 10662(11) | 4130(12) | 6797(3)  | 93(2) |
| C(14) | 11203(10) | 2925(12) | 7202(3)  | 97(3) |
| C(15) | 10641(8)  | 3080(10) | 7676(2)  | 77(2) |

---

Table 3. Bond lengths [Å] and angles [deg] for 170906f.

---

|            |          |
|------------|----------|
| O(4)-S(1)  | 1.455(4) |
| O(1)-C(1)  | 1.378(6) |
| O(1)-C(8)  | 1.455(6) |
| O(2)-C(1)  | 1.198(6) |
| O(3)-C(5)  | 1.379(6) |
| O(3)-C(10) | 1.392(6) |
| F(1)-S(1)  | 1.402(4) |
| O(5)-S(1)  | 1.461(5) |
| S(1)-C(9)  | 1.760(5) |
| C(1)-C(2)  | 1.440(7) |
| C(2)-C(7)  | 1.376(6) |
| C(2)-C(3)  | 1.391(7) |
| C(3)-C(4)  | 1.361(8) |
| C(3)-H(3)  | 0.9300   |
| C(4)-C(5)  | 1.410(8) |
| C(4)-H(4)  | 0.9300   |
| C(5)-C(6)  | 1.370(7) |
| C(6)-C(7)  | 1.389(7) |
| C(6)-H(6)  | 0.9300   |



|                 |           |
|-----------------|-----------|
| C(7)-C(8)       | 1.507(6)  |
| C(8)-C(9)       | 1.508(7)  |
| C(8)-H(8)       | 0.9800    |
| C(9)-H(9A)      | 0.9700    |
| C(9)-H(9B)      | 0.9700    |
| C(10)-C(11)     | 1.351(9)  |
| C(10)-C(15)     | 1.362(9)  |
| C(11)-C(12)     | 1.395(10) |
| C(11)-H(11)     | 0.9300    |
| C(12)-C(13)     | 1.336(11) |
| C(12)-H(12)     | 0.9300    |
| C(13)-C(14)     | 1.353(11) |
| C(13)-H(13)     | 0.9300    |
| C(14)-C(15)     | 1.375(9)  |
| C(14)-H(14)     | 0.9300    |
| C(15)-H(15)     | 0.9300    |
|                 |           |
| C(1)-O(1)-C(8)  | 109.8(4)  |
| C(5)-O(3)-C(10) | 122.0(4)  |
| F(1)-S(1)-O(4)  | 112.2(3)  |
| F(1)-S(1)-O(5)  | 113.2(3)  |
| O(4)-S(1)-O(5)  | 108.7(4)  |
| F(1)-S(1)-C(9)  | 111.2(2)  |
| O(4)-S(1)-C(9)  | 106.2(3)  |

|                |          |
|----------------|----------|
| O(5)-S(1)-C(9) | 104.9(3) |
| O(2)-C(1)-O(1) | 120.0(5) |
| O(2)-C(1)-C(2) | 131.3(5) |
| O(1)-C(1)-C(2) | 108.6(4) |
| C(7)-C(2)-C(3) | 120.1(4) |
| C(7)-C(2)-C(1) | 109.5(4) |
| C(3)-C(2)-C(1) | 130.4(4) |
| C(4)-C(3)-C(2) | 119.5(5) |
| C(4)-C(3)-H(3) | 120.2    |
| C(2)-C(3)-H(3) | 120.2    |
| C(3)-C(4)-C(5) | 119.3(5) |
| C(3)-C(4)-H(4) | 120.3    |
| C(5)-C(4)-H(4) | 120.3    |
| C(6)-C(5)-O(3) | 114.3(4) |
| C(6)-C(5)-C(4) | 122.2(5) |
| O(3)-C(5)-C(4) | 123.4(4) |
| C(5)-C(6)-C(7) | 117.0(4) |
| C(5)-C(6)-H(6) | 121.5    |
| C(7)-C(6)-H(6) | 121.5    |
| C(2)-C(7)-C(6) | 121.9(4) |
| C(2)-C(7)-C(8) | 107.8(4) |
| C(6)-C(7)-C(8) | 130.2(4) |
| O(1)-C(8)-C(7) | 104.2(4) |
| O(1)-C(8)-C(9) | 109.4(4) |

|                   |          |
|-------------------|----------|
| C(7)-C(8)-C(9)    | 112.4(4) |
| O(1)-C(8)-H(8)    | 110.2    |
| C(7)-C(8)-H(8)    | 110.2    |
| C(9)-C(8)-H(8)    | 110.2    |
| C(8)-C(9)-S(1)    | 113.0(3) |
| C(8)-C(9)-H(9A)   | 109.0    |
| S(1)-C(9)-H(9A)   | 109.0    |
| C(8)-C(9)-H(9B)   | 109.0    |
| S(1)-C(9)-H(9B)   | 109.0    |
| H(9A)-C(9)-H(9B)  | 107.8    |
| C(11)-C(10)-C(15) | 120.1(5) |
| C(11)-C(10)-O(3)  | 123.4(6) |
| C(15)-C(10)-O(3)  | 116.4(6) |
| C(10)-C(11)-C(12) | 119.7(7) |
| C(10)-C(11)-H(11) | 120.1    |
| C(12)-C(11)-H(11) | 120.1    |
| C(13)-C(12)-C(11) | 119.7(7) |
| C(13)-C(12)-H(12) | 120.1    |
| C(11)-C(12)-H(12) | 120.1    |
| C(12)-C(13)-C(14) | 120.5(6) |
| C(12)-C(13)-H(13) | 119.7    |
| C(14)-C(13)-H(13) | 119.7    |
| C(13)-C(14)-C(15) | 120.3(7) |
| C(13)-C(14)-H(14) | 119.8    |

|                   |          |
|-------------------|----------|
| C(15)-C(14)-H(14) | 119.8    |
| C(10)-C(15)-C(14) | 119.4(7) |
| C(10)-C(15)-H(15) | 120.3    |
| C(14)-C(15)-H(15) | 120.3    |

---

Symmetry transformations used to generate equivalent atoms:

Table 4. Anisotropic displacement parameters ( $\text{\AA}^2 \times 10^3$ ) for 170906f.

The anisotropic displacement factor exponent takes the form:

$$-2 \pi^2 [ h^2 a^{*2} U_{11} + \dots + 2 h k a^* b^* U_{12} ]$$

---

|      | U11    | U22    | U33   | U23    | U13   | U12    |
|------|--------|--------|-------|--------|-------|--------|
| O(4) | 86(3)  | 142(5) | 78(3) | -68(3) | 34(2) | -61(3) |
| O(1) | 62(2)  | 41(2)  | 59(2) | -7(2)  | 18(2) | -1(2)  |
| O(2) | 68(2)  | 35(2)  | 76(2) | -3(2)  | 1(2)  | -9(2)  |
| O(3) | 144(4) | 57(3)  | 91(3) | -22(2) | 81(3) | -30(3) |
| F(1) | 75(2)  | 152(4) | 91(3) | -20(3) | 34(2) | -21(3) |
| O(5) | 130(5) | 126(5) | 91(3) | 63(3)  | 43(3) | 17(4)  |
| S(1) | 57(1)  | 76(1)  | 46(1) | -7(1)  | 18(1) | -16(1) |
| C(1) | 45(3)  | 36(3)  | 54(3) | 1(2)   | -1(2) | -2(2)  |
| C(2) | 44(3)  | 37(3)  | 51(3) | 2(2)   | 3(2)  | -10(2) |
| C(3) | 59(3)  | 49(3)  | 59(3) | 3(2)   | 13(3) | -18(2) |
| C(4) | 66(3)  | 65(4)  | 56(3) | -3(3)  | 25(3) | -19(3) |

---

|       |        |       |        |        |       |        |
|-------|--------|-------|--------|--------|-------|--------|
| C(5)  | 75(4)  | 48(3) | 60(3)  | -6(2)  | 33(3) | -17(3) |
| C(6)  | 67(3)  | 45(3) | 50(3)  | -7(2)  | 20(2) | -21(2) |
| C(7)  | 46(3)  | 40(3) | 42(2)  | -1(2)  | 7(2)  | -9(2)  |
| C(8)  | 47(3)  | 42(3) | 47(3)  | -10(2) | 13(2) | -9(2)  |
| C(9)  | 50(3)  | 42(3) | 49(3)  | -2(2)  | 16(2) | -4(2)  |
| C(10) | 79(4)  | 55(3) | 54(3)  | -13(3) | 30(3) | -19(3) |
| C(11) | 71(4)  | 68(4) | 100(5) | 2(4)   | 17(4) | 5(3)   |
| C(12) | 133(7) | 86(5) | 52(3)  | 13(3)  | -1(4) | -8(5)  |
| C(13) | 144(7) | 77(5) | 67(4)  | -8(4)  | 52(5) | -9(5)  |
| C(14) | 115(6) | 84(5) | 107(6) | 11(5)  | 65(5) | 24(5)  |
| C(15) | 95(5)  | 77(4) | 64(4)  | 6(3)   | 30(3) | 7(4)   |

---

Table 5. Hydrogen coordinates ( $\times 10^4$ ) and isotropic displacement parameters ( $\text{Å}^2 \times 10^3$ ) for 170906f.

| U(eq) | x     | y     | z     |     |
|-------|-------|-------|-------|-----|
| H(3)  | 10065 | 10432 | 8739  | 66  |
| H(4)  | 10250 | 7832  | 8177  | 73  |
| H(6)  | 7360  | 4604  | 8945  | 63  |
| H(8)  | 5897  | 7417  | 9627  | 54  |
| H(9A) | 8724  | 6317  | 10259 | 55  |
| H(9B) | 7502  | 4770  | 10003 | 55  |
| H(11) | 8142  | 6482  | 7355  | 95  |
| H(12) | 9224  | 6326  | 6574  | 110 |
| H(13) | 11057 | 4024  | 6479  | 111 |
| H(14) | 11959 | 1987  | 7160  | 117 |
| H(15) | 11047 | 2292  | 7959  | 92  |





Table 6. Torsion angles [deg] for 170906f.

---

|                      |           |
|----------------------|-----------|
| C(8)-O(1)-C(1)-O(2)  | -178.5(4) |
| C(8)-O(1)-C(1)-C(2)  | 1.1(5)    |
| O(2)-C(1)-C(2)-C(7)  | 179.9(5)  |
| O(1)-C(1)-C(2)-C(7)  | 0.3(5)    |
| O(2)-C(1)-C(2)-C(3)  | 0.0(9)    |
| O(1)-C(1)-C(2)-C(3)  | -179.5(5) |
| C(7)-C(2)-C(3)-C(4)  | -1.6(8)   |
| C(1)-C(2)-C(3)-C(4)  | 178.3(5)  |
| C(2)-C(3)-C(4)-C(5)  | 1.6(9)    |
| C(10)-O(3)-C(5)-C(6) | 168.6(6)  |
| C(10)-O(3)-C(5)-C(4) | -14.5(10) |
| C(3)-C(4)-C(5)-C(6)  | -1.2(10)  |
| C(3)-C(4)-C(5)-O(3)  | -177.8(6) |
| O(3)-C(5)-C(6)-C(7)  | 177.6(5)  |
| C(4)-C(5)-C(6)-C(7)  | 0.7(9)    |
| C(3)-C(2)-C(7)-C(6)  | 1.1(8)    |
| C(1)-C(2)-C(7)-C(6)  | -178.8(5) |
| C(3)-C(2)-C(7)-C(8)  | 178.3(5)  |
| C(1)-C(2)-C(7)-C(8)  | -1.6(5)   |

|                         |           |
|-------------------------|-----------|
| C(5)-C(6)-C(7)-C(2)     | -0.6(8)   |
| C(5)-C(6)-C(7)-C(8)     | -177.1(5) |
| C(1)-O(1)-C(8)-C(7)     | -2.0(5)   |
| C(1)-O(1)-C(8)-C(9)     | 118.5(4)  |
| C(2)-C(7)-C(8)-O(1)     | 2.1(5)    |
| C(6)-C(7)-C(8)-O(1)     | 179.0(5)  |
| C(2)-C(7)-C(8)-C(9)     | -116.2(5) |
| C(6)-C(7)-C(8)-C(9)     | 60.7(7)   |
| O(1)-C(8)-C(9)-S(1)     | 67.3(4)   |
| C(7)-C(8)-C(9)-S(1)     | -177.4(3) |
| F(1)-S(1)-C(9)-C(8)     | 41.4(5)   |
| O(4)-S(1)-C(9)-C(8)     | -80.8(5)  |
| O(5)-S(1)-C(9)-C(8)     | 164.2(4)  |
| C(5)-O(3)-C(10)-C(11)   | -58.2(9)  |
| C(5)-O(3)-C(10)-C(15)   | 125.8(7)  |
| C(15)-C(10)-C(11)-C(12) | -0.4(10)  |
| O(3)-C(10)-C(11)-C(12)  | -176.2(6) |
| C(10)-C(11)-C(12)-C(13) | 2.7(12)   |
| C(11)-C(12)-C(13)-C(14) | -2.1(13)  |
| C(12)-C(13)-C(14)-C(15) | -0.7(13)  |
| C(11)-C(10)-C(15)-C(14) | -2.3(11)  |
| O(3)-C(10)-C(15)-C(14)  | 173.7(7)  |
| C(13)-C(14)-C(15)-C(10) | 2.9(12)   |

---

Symmetry transformations used to generate equivalent atoms:

Table 7. Hydrogen bonds for 170906f [A and deg.].

---



---

| D-H...A<br><(DHA) | d(D-H) | d(H...A) | d(D...A) |
|-------------------|--------|----------|----------|
|-------------------|--------|----------|----------|

9.2 Data of crystal structure for 7i.

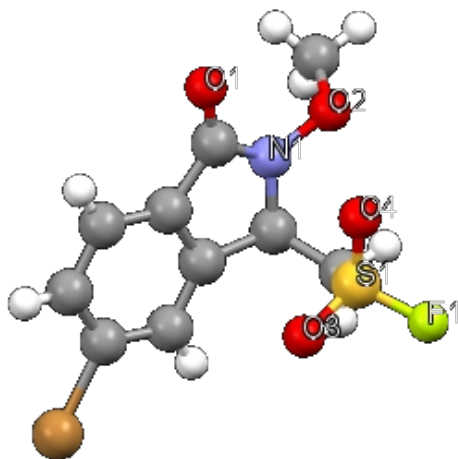

Table 1. Crystal data and structure refinement for 170526e.

|                     |                    |
|---------------------|--------------------|
| Identification code | 170526e            |
| Empirical formula   | C10 H9 Br F N O4 S |
| Formula weight      | 338.15             |

|                                 |                                                                                                                                |
|---------------------------------|--------------------------------------------------------------------------------------------------------------------------------|
| Temperature                     | 298(2) K                                                                                                                       |
| Wavelength                      | 0.71073 Å                                                                                                                      |
| Crystal system, space group     | Monoclinic, P2(1)/n                                                                                                            |
| Unit cell dimensions            | a = 8.7382(6) Å    alpha = 90 deg.<br>b = 5.8569(4) Å    beta =<br>91.1410(10) deg.<br>c = 23.8346(18) Å    gamma = 90<br>deg. |
| Volume                          | 1219.58(15) Å <sup>3</sup>                                                                                                     |
| Z, Calculated density           | 4, 1.842 Mg/m <sup>3</sup>                                                                                                     |
| Absorption coefficient          | 3.560 mm <sup>-1</sup>                                                                                                         |
| F(000)                          | 672                                                                                                                            |
| Crystal size                    | 0.40 x 0.30 x 0.23 mm                                                                                                          |
| Theta range for data collection | 2.50 to 25.02 deg.                                                                                                             |

|                                   |                                                           |
|-----------------------------------|-----------------------------------------------------------|
| Limiting indices                  | $-10 \leq h \leq 9, -6 \leq k \leq 6, -28 \leq l \leq 20$ |
| Reflections collected / unique    | 5749 / 2143 [R(int) = 0.0441]                             |
| Completeness to theta = 25.02     | 99.6 %                                                    |
| Absorption correction             | Semi-empirical from equivalents                           |
| Max. and min. transmission        | 0.4948 and 0.3301                                         |
| Refinement method                 | Full-matrix least-squares on F <sup>2</sup>               |
| Data / restraints / parameters    | 2143 / 0 / 164                                            |
| Goodness-of-fit on F <sup>2</sup> | 1.043                                                     |
| Final R indices [I > 2sigma(I)]   | R1 = 0.0397, wR2 = 0.0926                                 |
| R indices (all data)              | R1 = 0.0627, wR2 = 0.0996                                 |
| Largest diff. peak and hole       | 0.540 and -0.433 e.A <sup>-3</sup>                        |

Table 2. Atomic coordinates ( $\times 10^4$ ) and equivalent isotropic displacement parameters ( $\text{\AA}^2 \times 10^3$ ) for 170526e.

U(eq) is defined as one third of the trace of the orthogonalized Uij tensor.

---

| U(eq) | x       | y        | z              |
|-------|---------|----------|----------------|
| Br(1) | 9087(1) | 13223(1) | 478(1) 65(1)   |
| F(1)  | 5730(5) | 8440(5)  | 2955(1) 112(1) |
| N(1)  | 3051(3) | 8412(5)  | 1345(1) 47(1)  |
| O(1)  | 3187(3) | 5201(5)  | 794(1) 55(1)   |
| O(2)  | 1812(3) | 7716(5)  | 1658(1) 48(1)  |
| O(3)  | 7010(4) | 8309(7)  | 2116(2) 102(1) |
| O(4)  | 4784(5) | 6005(5)  | 2246(2) 114(2) |
| S(1)  | 5528(1) | 8047(2)  | 2342(1) 52(1)  |
| C(1)  | 3683(4) | 7039(7)  | 955(2) 40(1)   |
| C(2)  | 5057(4) | 8308(6)  | 780(2) 36(1)   |
| C(3)  | 6088(4) | 7808(7)  | 366(2) 45(1)   |

|       |         |          |         |       |
|-------|---------|----------|---------|-------|
| C(4)  | 7281(4) | 9281(7)  | 280(2)  | 46(1) |
| C(5)  | 7406(4) | 11222(7) | 601(2)  | 43(1) |
| C(6)  | 6396(4) | 11778(6) | 1016(2) | 41(1) |
| C(7)  | 5212(4) | 10285(6) | 1100(1) | 36(1) |
| C(8)  | 3923(4) | 10412(6) | 1515(2) | 39(1) |
| C(9)  | 4404(4) | 10394(6) | 2133(2) | 46(1) |
| C(10) | 420(5)  | 8374(8)  | 1382(2) | 65(1) |

---



Table 3. Bond lengths [Å] and angles [deg] for 170526e.

---

|            |          |
|------------|----------|
| Br(1)-C(5) | 1.906(4) |
| F(1)-S(1)  | 1.486(3) |
| N(1)-C(1)  | 1.355(5) |
| N(1)-O(2)  | 1.387(4) |
| N(1)-C(8)  | 1.451(5) |
| O(1)-C(1)  | 1.220(4) |
| O(2)-C(10) | 1.424(5) |
| O(3)-S(1)  | 1.421(3) |
| O(4)-S(1)  | 1.378(3) |
| S(1)-C(9)  | 1.756(4) |
| C(1)-C(2)  | 1.479(5) |
| C(2)-C(3)  | 1.380(5) |
| C(2)-C(7)  | 1.392(5) |
| C(3)-C(4)  | 1.372(5) |
| C(3)-H(3)  | 0.9300   |
| C(4)-C(5)  | 1.374(5) |
| C(4)-H(4)  | 0.9300   |
| C(5)-C(6)  | 1.377(5) |
| C(6)-C(7)  | 1.372(5) |

|              |          |
|--------------|----------|
| C(6)-H(6)    | 0.9300   |
| C(7)-C(8)    | 1.515(4) |
| C(8)-C(9)    | 1.522(5) |
| C(8)-H(8)    | 0.9800   |
| C(9)-H(9A)   | 0.9700   |
| C(9)-H(9B)   | 0.9700   |
| C(10)-H(10A) | 0.9600   |
| C(10)-H(10B) | 0.9600   |
| C(10)-H(10C) | 0.9600   |

|                 |            |
|-----------------|------------|
| C(1)-N(1)-O(2)  | 121.8(3)   |
| C(1)-N(1)-C(8)  | 116.8(3)   |
| O(2)-N(1)-C(8)  | 119.9(3)   |
| N(1)-O(2)-C(10) | 110.0(3)   |
| O(4)-S(1)-O(3)  | 117.5(3)   |
| O(4)-S(1)-F(1)  | 110.2(3)   |
| O(3)-S(1)-F(1)  | 105.3(3)   |
| O(4)-S(1)-C(9)  | 111.9(2)   |
| O(3)-S(1)-C(9)  | 108.4(2)   |
| F(1)-S(1)-C(9)  | 102.35(18) |
| O(1)-C(1)-N(1)  | 126.3(3)   |
| O(1)-C(1)-C(2)  | 129.8(3)   |
| N(1)-C(1)-C(2)  | 103.9(3)   |
| C(3)-C(2)-C(7)  | 120.7(3)   |

|                 |          |
|-----------------|----------|
| C(3)-C(2)-C(1)  | 129.8(3) |
| C(7)-C(2)-C(1)  | 109.5(3) |
| C(4)-C(3)-C(2)  | 118.8(4) |
| C(4)-C(3)-H(3)  | 120.6    |
| C(2)-C(3)-H(3)  | 120.6    |
| C(3)-C(4)-C(5)  | 119.3(3) |
| C(3)-C(4)-H(4)  | 120.4    |
| C(5)-C(4)-H(4)  | 120.4    |
| C(4)-C(5)-C(6)  | 123.4(4) |
| C(4)-C(5)-Br(1) | 118.4(3) |
| C(6)-C(5)-Br(1) | 118.2(3) |
| C(7)-C(6)-C(5)  | 116.8(4) |
| C(7)-C(6)-H(6)  | 121.6    |
| C(5)-C(6)-H(6)  | 121.6    |
| C(6)-C(7)-C(2)  | 121.0(3) |
| C(6)-C(7)-C(8)  | 129.5(3) |
| C(2)-C(7)-C(8)  | 109.5(3) |
| N(1)-C(8)-C(7)  | 99.9(3)  |
| N(1)-C(8)-C(9)  | 113.4(3) |
| C(7)-C(8)-C(9)  | 115.9(3) |
| N(1)-C(8)-H(8)  | 109.1    |
| C(7)-C(8)-H(8)  | 109.1    |
| C(9)-C(8)-H(8)  | 109.1    |
| C(8)-C(9)-S(1)  | 115.0(3) |

|                     |       |
|---------------------|-------|
| C(8)-C(9)-H(9A)     | 108.5 |
| S(1)-C(9)-H(9A)     | 108.5 |
| C(8)-C(9)-H(9B)     | 108.5 |
| S(1)-C(9)-H(9B)     | 108.5 |
| H(9A)-C(9)-H(9B)    | 107.5 |
| O(2)-C(10)-H(10A)   | 109.5 |
| O(2)-C(10)-H(10B)   | 109.5 |
| H(10A)-C(10)-H(10B) | 109.5 |
| O(2)-C(10)-H(10C)   | 109.5 |
| H(10A)-C(10)-H(10C) | 109.5 |
| H(10B)-C(10)-H(10C) | 109.5 |

---

Symmetry transformations used to generate equivalent atoms:

Table 4. Anisotropic displacement parameters ( $\text{\AA}^2 \times 10^3$ ) for 170526e.

The anisotropic displacement factor exponent takes the form:

$$-2 \pi^2 [ h^2 a^{*2} U_{11} + \dots + 2 h k a^* b^* U_{12} ]$$

---

|       | U11    | U22    | U33    | U23   | U13    | U12    |
|-------|--------|--------|--------|-------|--------|--------|
| Br(1) | 60(1)  | 55(1)  | 82(1)  | 21(1) | 26(1)  | -6(1)  |
| F(1)  | 183(4) | 98(3)  | 54(2)  | 9(2)  | -13(2) | 24(2)  |
| N(1)  | 49(2)  | 45(2)  | 47(2)  | -5(2) | 19(2)  | -10(2) |
| O(1)  | 63(2)  | 40(2)  | 63(2)  | -9(2) | 6(1)   | -5(1)  |
| O(2)  | 44(1)  | 54(2)  | 48(2)  | 14(1) | 14(1)  | -1(1)  |
| O(3)  | 68(2)  | 128(4) | 109(3) | 45(3) | 24(2)  | 30(2)  |
| O(4)  | 118(3) | 31(2)  | 191(4) | 17(2) | -72(3) | -6(2)  |
| S(1)  | 67(1)  | 41(1)  | 47(1)  | 6(1)  | 1(1)   | 0(1)   |
| C(1)  | 46(2)  | 38(2)  | 36(2)  | 5(2)  | 4(2)   | 6(2)   |
| C(2)  | 44(2)  | 31(2)  | 33(2)  | 2(2)  | 3(2)   | 4(2)   |
| C(3)  | 55(2)  | 41(2)  | 40(2)  | -6(2) | 5(2)   | 10(2)  |

---

|       |       |       |       |       |       |       |
|-------|-------|-------|-------|-------|-------|-------|
| C(4)  | 48(2) | 50(2) | 39(2) | -1(2) | 14(2) | 9(2)  |
| C(5)  | 45(2) | 43(2) | 43(2) | 15(2) | 11(2) | 6(2)  |
| C(6)  | 55(2) | 30(2) | 38(2) | 6(2)  | 10(2) | 2(2)  |
| C(7)  | 45(2) | 31(2) | 33(2) | 5(2)  | 10(2) | 6(2)  |
| C(8)  | 48(2) | 26(2) | 42(2) | 4(2)  | 14(2) | 5(2)  |
| C(9)  | 61(2) | 37(2) | 39(2) | 0(2)  | 18(2) | -1(2) |
| C(10) | 51(2) | 75(3) | 69(3) | 5(3)  | 2(2)  | 9(2)  |

---

Table 5. Hydrogen coordinates ( $\times 10^4$ ) and isotropic displacement parameters ( $\text{Å}^2 \times 10^3$ ) for 170526e.

| U(eq)  | x    | y     | z    |    |
|--------|------|-------|------|----|
| H(3)   | 5976 | 6494  | 150  | 54 |
| H(4)   | 7998 | 8969  | 7    | 55 |
| H(6)   | 6510 | 13101 | 1228 | 49 |
| H(8)   | 3312 | 11783 | 1438 | 46 |
| H(9A)  | 3489 | 10419 | 2356 | 55 |
| H(9B)  | 4972 | 11781 | 2214 | 55 |
| H(10A) | 428  | 9992  | 1317 | 98 |
| H(10B) | -428 | 7988  | 1614 | 98 |
| H(10C) | 322  | 7587  | 1030 | 98 |

Table 6. Torsion angles [deg] for 170526e.

---

|                      |           |
|----------------------|-----------|
| C(1)-N(1)-O(2)-C(10) | -91.5(4)  |
| C(8)-N(1)-O(2)-C(10) | 102.7(4)  |
| O(2)-N(1)-C(1)-O(1)  | 7.5(6)    |
| C(8)-N(1)-C(1)-O(1)  | 173.8(4)  |
| O(2)-N(1)-C(1)-C(2)  | -173.1(3) |
| C(8)-N(1)-C(1)-C(2)  | -6.9(4)   |
| O(1)-C(1)-C(2)-C(3)  | 4.1(7)    |
| N(1)-C(1)-C(2)-C(3)  | -175.2(4) |
| O(1)-C(1)-C(2)-C(7)  | -177.0(4) |
| N(1)-C(1)-C(2)-C(7)  | 3.7(4)    |
| C(7)-C(2)-C(3)-C(4)  | 0.7(5)    |
| C(1)-C(2)-C(3)-C(4)  | 179.6(4)  |
| C(2)-C(3)-C(4)-C(5)  | -0.8(6)   |
| C(3)-C(4)-C(5)-C(6)  | 0.6(6)    |
| C(3)-C(4)-C(5)-Br(1) | 179.3(3)  |
| C(4)-C(5)-C(6)-C(7)  | -0.3(6)   |
| Br(1)-C(5)-C(6)-C(7) | -179.0(3) |
| C(5)-C(6)-C(7)-C(2)  | 0.1(5)    |
| C(5)-C(6)-C(7)-C(8)  | -179.6(4) |



|                     |           |
|---------------------|-----------|
| C(3)-C(2)-C(7)-C(6) | -0.4(5)   |
| C(1)-C(2)-C(7)-C(6) | -179.4(3) |
| C(3)-C(2)-C(7)-C(8) | 179.4(3)  |
| C(1)-C(2)-C(7)-C(8) | 0.4(4)    |
| C(1)-N(1)-C(8)-C(7) | 7.0(4)    |
| O(2)-N(1)-C(8)-C(7) | 173.5(3)  |
| C(1)-N(1)-C(8)-C(9) | -117.0(4) |
| O(2)-N(1)-C(8)-C(9) | 49.5(4)   |
| C(6)-C(7)-C(8)-N(1) | 175.8(4)  |
| C(2)-C(7)-C(8)-N(1) | -4.0(4)   |
| C(6)-C(7)-C(8)-C(9) | -62.1(5)  |
| C(2)-C(7)-C(8)-C(9) | 118.2(3)  |
| N(1)-C(8)-C(9)-S(1) | 58.7(4)   |
| C(7)-C(8)-C(9)-S(1) | -56.0(4)  |
| O(4)-S(1)-C(9)-C(8) | -59.1(4)  |
| O(3)-S(1)-C(9)-C(8) | 72.0(3)   |
| F(1)-S(1)-C(9)-C(8) | -177.0(3) |

---

Symmetry transformations used to generate equivalent atoms:

Table 7. Hydrogen bonds for 170526e [A and deg.].

---

---

| D-H...A<br><(DHA) | d(D-H) | d(H...A) | d(D...A) |
|-------------------|--------|----------|----------|
|-------------------|--------|----------|----------|

### 10. References

- [1] Q. Zheng, J. Dong, K. B. Sharpless, *J. Org. Chem.* **2016**, *81*, 11360.  
[2] Y. Liu, H. Xu, W.-J. Kong, M. Shang, H.-X. Dai, J.-Q. Yu, *Nature*, **2014**, *515*, 389.  
[3] D. C. Fabry, J. Zoller, S. Raja, and M. Rueping, *Angew. Chem. Int. Ed.* **2014**, *53*, 10228.
